# 1 High Resolution Epigenomic Atlas of Early Human Craniofacial Development

2

3 Andrea Wilderman<sup>1,2</sup>, Jeffrey Kron<sup>2</sup>, Jennifer VanOudenhove<sup>2</sup>, James P. Noonan<sup>3,4</sup>, and  
4 Justin Cotney<sup>1,2,5,\*</sup>

5

6 <sup>1</sup>Graduate Program in Genetics and Developmental Biology, UConn Health; <sup>2</sup>Department of Genetics and  
7 Genome Sciences, UConn Health; <sup>3</sup>Department of Genetics, Yale University School of Medicine, <sup>4</sup>Kavli  
8 Institute for Neuroscience, Yale University; <sup>5</sup>Institute for Systems Genomics, University of Connecticut

9

10 \*correspondence should be sent to [cotney@uchc.edu](mailto:cotney@uchc.edu)

11

## 12 Abstract

13

14 Defects in embryonic patterning resulting in craniofacial abnormalities are common birth  
15 defects affecting up to 1 in 500 live births worldwide, and are mostly non-syndromic.  
16 The regulatory programs that build and shape the craniofacial complex are thought to  
17 be controlled by information encoded in the genome between genes and within intronic  
18 sequences. Early stages of human craniofacial development have not been interrogated  
19 with modern functional genomics techniques, preventing systematic analysis of genetic  
20 associations with craniofacial-specific regulatory sequences. Here we describe a  
21 comprehensive resource of craniofacial epigenomic annotations and systematic,  
22 integrative analysis with a variety of human tissues and cell types. We identified  
23 thousands of novel craniofacial enhancers and provide easily accessible genome  
24 annotations for craniofacial researchers and clinicians. We demonstrate the utility of our  
25 data to find likely causal variants for craniofacial abnormalities and identify a large  
26 enhancer cluster that interacts with *HOXA* genes during craniofacial development.

## 27 **Introduction**

28 Formation of the craniofacial complex is an intricate process of precisely timed events  
29 that occurs relatively early in vertebrate embryonic development. For example, in  
30 human embryonic development the majority of the events that lead to the formation of  
31 the human face and skull occur during the first ten weeks of gestation<sup>1</sup>. Defects in the  
32 orchestration of these events result in several different congenital abnormalities  
33 including failure of features to fuse (orofacial clefting) and premature fusion of structures  
34 (craniosynostosis). Worldwide, orofacial clefting is one of the most common birth  
35 defects, affecting ~1 in 700 live births<sup>2</sup>. The majority of those affected with these types  
36 of clefting do not have defects in other tissues or organ systems and thus are referred to  
37 as “non-syndromic”<sup>3</sup>. While these birth defects are largely repairable through surgical  
38 means, the financial, sociological, and psychological effects have a much broader  
39 impact and represent a significant public health burden<sup>4-7</sup>. Screening, prevention, and  
40 non-surgical therapeutic options are thus highly desirable. The high heritability of such  
41 disorders suggests a major genetic component<sup>8,9</sup>; however, causative genetic changes  
42 have only been identified in a fraction of those affected<sup>10</sup>. Candidate gene approaches  
43 have identified mutations in seven different genes that explain less than ten percent of  
44 non-syndromic orofacial clefting cases<sup>11</sup>. In the past decade, several genome wide  
45 association studies, copy number variant analyses, and whole exome sequencing  
46 studies have sought to identify additional genetic sources of non-syndromic orofacial  
47 clefting<sup>11-21</sup>. These studies identified common and rare variants associated with  
48 orofacial clefting, but most are located in non-coding portions of the genome. Our  
49 genomes are littered with gene regulatory sequences, located primarily in intronic and  
50 intergenic sequences, that are active in a small number of tissues and/or developmental  
51 stages in humans<sup>22</sup>. While the regulatory potential of the human genome is still not  
52 completely understood, defects in regulatory sequences can cause non-syndromic  
53 developmental defects in humans and mice<sup>23-26</sup>. These findings, coupled with the non-  
54 syndromic nature of most orofacial clefting cases, suggest defective gene regulatory  
55 sequences may underlie much of the incidence of orofacial clefting. However, mapping  
56 of chromatin states and identification of craniofacial-specific regulatory sequences has  
57 been ignored by large functional genomics efforts such as ENCODE and Roadmap

58 Epigenome<sup>22</sup>. The lack of craniofacial-specific gene regulatory information has impeded  
59 the identification of regulatory circuitry important for human craniofacial development  
60 and has prevented accurate interpretation of clinical genetic findings in patients with  
61 craniofacial disorders. Lastly, without sufficient biological context, prioritization and  
62 developing of hypotheses to test genetic associations with craniofacial abnormalities are  
63 hindered<sup>27-30</sup>. Here we present a comprehensive resource of functional genomics data  
64 and predicted chromatin states for important stages of early human craniofacial  
65 development. We have profiled multiple biochemical marks of chromatin activity in  
66 developing human craniofacial tissue samples encompassing 4.5 to 8 post conception  
67 weeks. We have comprehensively compared these data with publicly available genomic  
68 and genetic data from 127 epigenomes which include a wide variety of adult and fetal  
69 tissues. We provide annotations consistent with large consortia efforts<sup>22</sup> in formats  
70 easily loadable into modern genome browsers to enable exploration by other  
71 researchers without large computational effort. We demonstrate how to mine this data  
72 for biological features relevant to craniofacial development and how to experimentally  
73 validate target gene interactions. In total, our analyses have identified thousands of  
74 previously unknown craniofacial enhancer sequences. These analyses will facilitate  
75 interpretation of genetic variation in the context of congenital craniofacial defects, and  
76 will enable future experimental testing of enhancer-target gene interactions in  
77 developing craniofacial tissues.

## 78 **Results**

### 79 **Profiling of Histone Modifications in Developing Human Embryonic Craniofacial** 80 **Tissue.**

81 Chromatin immunoprecipitation of post-translational histone modifications coupled with  
82 next generation sequencing (ChIP-Seq) is a powerful method to identify active  
83 regulatory sequences in a global fashion from a wide variety of biological contexts<sup>22</sup>.  
84 Many of the regulatory elements identified by this method are specific to the biological  
85 context queried<sup>31,32</sup> (i.e. tissue type or developmental stage) and are enriched for  
86 genetic associations with disease in a relevant tissue (i.e. immune-related disorder

87 associations in immune cell-specific enhancers)<sup>33,34</sup>. To identify regulatory sequences  
88 important for human craniofacial development, we utilized ChIP-Seq of six post-  
89 translational histone modifications across multiple stages and multiple biological  
90 replicates of early human craniofacial development. We focused our efforts on histone  
91 modifications both profiled by large consortia and strongly associated with multiple  
92 states of chromatin activity. We performed parallel ChIP-Seq experiments on  
93 craniofacial tissues obtained from 17 individual human embryos spanning the critical  
94 window for the formation of the human orofacial apparatus (**Fig. 1a**). Specifically, we  
95 profiled marks ranging from those associated with repression (H3K27me3), promoter  
96 activation (H3K4me3), active transcription (H3K36me3), and various states of enhancer  
97 activation (H3K4me1, H3K4me2, and H3K27ac) (**Fig. 1b**)<sup>35</sup>. We profiled at least three  
98 biological replicates for four distinct Carnegie stages (CS) (CS13, CS14, CS15, and  
99 CS17) encompassing 4.5 post conception weeks (pcw) to 6 pcw. We also profiled single  
100 biological samples from CS20 (8 pcw) and 10 pcw embryos (**Fig. 1c**). We obtained over  
101 5.3 billion ChIP-Seq reads across a total of 106 datasets, with mean total reads and  
102 uniquely aligned reads per sample of 50.3 and 37.3 million respectively  
103 (**Supplementary Table 1**). Overall the samples correlated well by mark and stage of  
104 development (**Fig. 2a and Supplementary Fig. 1**). We uniformly processed these data  
105 to identify reproducibly enriched regions for each mark within each stage. The genomic  
106 features identified by each set of enriched regions closely mirror what has previously  
107 been reported for each of these post-translational marks (**Fig. 2b and Supplementary**  
108 **Fig. 2**)<sup>32,35</sup>. For example, we observed very strong enrichment of H3K4me3 at  
109 promoters of genes and identified a large number of intronic or intergenic regions  
110 enriched for H3K27ac. When we examined all the samples for a given Carnegie stage,  
111 we identified thousands of enriched regions, at each stage for each mark, that were  
112 found in at least two biological replicates (**Fig. 2c**). Combined, these results indicated  
113 our ChIP-Seq data from human embryonic tissues were of high quality, reflected the  
114 previously described nature of these marks, and was likely to identify tissue-specific  
115 regulatory sequences.

## 116 **Generation of Human Craniofacial Chromatin State Segmentations**

117 Defining enriched regions for a single histone modification such as H3K27ac has  
118 been utilized to identify active regulatory sequences from a variety of tissues, biological  
119 contexts, and different species<sup>36-40</sup>. However, in the absence of H3K27ac, other marks  
120 can identify active regulatory sequences, and low levels of H3K27ac may be present at  
121 enhancers that are either about to become active or are no longer active<sup>41-43</sup>. More  
122 advanced methods, such as using machine learning techniques and integrating multiple  
123 chromatin signals from a single tissue, allow segmentation of the genome into a more  
124 complex array of biological states<sup>44,45</sup>. These techniques can identify tissue-specific and  
125 disease-relevant regulatory information in a large cohort of tissues<sup>35,46</sup>. To leverage  
126 such available data to identify regulatory information likely to be critical for craniofacial  
127 development, we processed our data in a uniform fashion to match those generated by  
128 Roadmap Epigenome (Methods)<sup>22</sup>. Using p-value based signals<sup>47,48</sup> for each of the six  
129 epigenomic marks we assayed, along with the same type of signals for 12 epigenomic  
130 marks for 127 tissues and cell types generated by Roadmap Epigenome, we imputed  
131 our data to create a uniform, directly comparable dataset<sup>49</sup> (**Fig. 1c**). The imputed  
132 samples' signals correlated well with their primary signals and clustered generally by  
133 mark and biological function (**Fig. 3a and Supplementary Fig. 3**). Using the imputed  
134 craniofacial data, we then segmented the genome for each embryonic sample based on  
135 previously generated models of 15, 18, and 25 states of chromatin activity<sup>22</sup>. We  
136 identified similar numbers and proportions of segments in each state in our tissues (**Fig.**  
137 **3b and Supplementary Fig. 4**). The 25-state model results showed the most similar  
138 trends across these measures and utilized all of the primary data generated in our study  
139 when compared to those previously generated by Roadmap Epigenome (**Fig. 3c,d and**  
140 **Supplementary Fig. 4**); therefore we focused our downstream analyses on these  
141 segmentations. Using the 25-state segmentations, we reproducibly identified 75928  
142 segments in at least one of six enhancer categories defined by Roadmap Epigenome  
143 (EnhA1, EnhA2, EnhAF, EnhW1, EnhW2, and EnhAc). To determine if these  
144 segmentations are enriched for craniofacial enhancers, we first turned to a large catalog  
145 of experimentally validated developmental enhancers tested in mouse embryos and  
146 available in the Vista Enhancer Browser<sup>50</sup>. We identified over 80% of all craniofacial-

147 positive enhancers in this database. Moreover, our enhancer annotations were  
148 significantly enriched for craniofacial enhancers versus those that lacked craniofacial  
149 activity ( $p = 3.28 \times 10^{-14}$ ) (**Fig. 4a,b and Supplementary Fig. 5**). While these results are  
150 encouraging - namely, that our data identified craniofacial enhancers - they did not  
151 reveal any specificity for craniofacial tissues in our chromatin state annotations. To  
152 address this problem, we quantitatively compared H3K27ac signals at all enhancer  
153 segments in our data with 127 samples from Roadmap Epigenome. Both hierarchical  
154 clustering and principal component analysis showed that our samples were well  
155 correlated with one another in this multi-tissue context (**Fig. 4c and Supplementary**  
156 **Fig. 6**). They were most similar to embryonic stem cells (ESC) and cell types derived  
157 from them (ESDR), but distinct from fetal and adult samples present in Roadmap  
158 Epigenome data. Previous analyses of Roadmap Epigenome have identified a  
159 significant number of enhancers that are tissue-specific<sup>22</sup>. To identify such novel  
160 enhancers in craniofacial tissue we first determined if any of our enhancer segments  
161 were ever annotated as such in the 127 samples obtained from Roadmap Epigenome.  
162 We identified 6651 enhancer segments (8.7% of total craniofacial enhancer segments)  
163 in our craniofacial epigenomic atlas that were never annotated as any type of enhancer  
164 state in all of Roadmap Epigenome (**Supplementary Table 2**). To determine if these  
165 sites are relevant for craniofacial development or represent spurious segmentations in  
166 our data we analyzed sequence content of these regions and functional enrichments of  
167 genes potentially regulated by these regions. When we assessed the novel craniofacial-  
168 specific enhancers for enrichment of transcription factor binding sites, we identified  
169 motifs matching those of *TWIST2*, *LMX1B*, *SIX1*, *NKX6.1*, multiple members of the *LHX*  
170 and *HOX* families, and *TCF12*, all of which have been implicated in craniofacial and  
171 skeletal development<sup>51-57</sup> (**Fig. 4d and Supplementary Table 3**). Utilizing the Genomic  
172 Regions Enrichment of Annotations Tool (GREAT)<sup>58</sup>, we found significant enrichment of  
173 craniofacial-specific enhancers assigned to genes associated with craniofacial  
174 abnormalities such as cleft palate in both humans and mice (**Fig. 4e and**  
175 **Supplementary Fig. 7**). Interestingly, we also identified more general categories of  
176 enrichment amongst the putative gene targets including general transcriptional  
177 activators (**Supplementary Table 4**). When we interrogated this list of transcription



178 factors, we found significant enrichment for expression in both craniofacial and  
179 appendicular skeleton (**Fig. 4f**). These results suggest that many of the novel  
180 craniofacial enhancers we identified are likely to play a direct role in patterning of the  
181 bones of the face, jaws, and portions of the skull. However, it is unclear whether they  
182 are directly involved in human craniofacial abnormalities.

183 To begin to explore this uncertainty, we turned to genome wide association data  
184 obtained from the GWAS catalog related to orofacial clefting and craniofacial  
185 morphology<sup>17,21,59-63</sup>. We overlaid associations from these studies with each of the  
186 segmentation maps from our data, as well as data from Roadmap Epigenome, and  
187 assessed enrichment. We observed significant enrichment of orofacial clefting tag SNPs  
188 in most of our craniofacial samples and relatively few Roadmap Epigenomes  
189 (**Supplementary Fig. 8a**). These analyses identified several enhancer segments that  
190 directly contain strong genetic associations. For instance, we identified a discrete  
191 enhancer state in the noncoding region between *IRF6* and *DIEXF* that contains a tag  
192 SNP previously associated with non-syndromic cleft lip and palate<sup>64</sup> (**Supplementary**  
193 **Fig. 8b**). This particular region can directly influence *IRF6* expression and is potentially  
194 a causative allele for orofacial clefting<sup>65</sup>. We also identified 13 other regions that are  
195 identified in craniofacial tissue and directly contain such tag SNPs, including an intronic  
196 sequence of the *TXNDC16* gene<sup>59</sup> (**Supplementary Fig. 8c and Supplementary Table**  
197 **5**). These findings suggest that our chromatin state maps will be extremely useful in  
198 identifying and prioritizing causative variation in patients affected by craniofacial  
199 abnormalities.

## 200 **Machine learning approaches to mining of activated craniofacial enhancer data.**

201 To more comprehensively explore our data for regions likely to be important for  
202 craniofacial development and human disease, we turned to the unsupervised machine  
203 learning method known as self-organizing maps. This approach is a powerful means to  
204 identify relationships within large genomic datasets, but also allows fine-grained  
205 analysis relevant to specific biological questions<sup>66</sup>. We first extracted H3K27ac signals  
206 from all of our craniofacial samples and all Roadmap Epigenome samples across all  
207 enhancer segmentations, resulting in signal measurements for 425000 enhancer

208 segments in 146 epigenomes. The resulting matrix was used to train a self-organizing  
209 toroid map with a map size of 2500 units; we selected the best scoring map from 50  
210 map building trials. We then clustered each of the units of the map into metaclusters  
211 and found 199 that identify enhancer segments that have similar signal properties and  
212 are likely to be biologically related (**Fig. 5a**). For each enhancer segment, we assigned  
213 potential target genes and overlaid the gene assignments to each unit. Based on these  
214 gene assignments, we then determined the gene and human phenotype ontology  
215 enrichments of each unit. This resource is available for interrogation via a standard web  
216 browser, allowing for retrieval of regions, genes, and functional associations for each  
217 unit and metacluster. Inspection of this map identified several metaclusters that showed  
218 distinct H3K27ac activation in craniofacial tissues. These clusters were enriched for a  
219 number of ontologies related to craniofacial biology and abnormalities. For example, we  
220 identified a metacluster that showed significantly increased H3K27ac signal in  
221 craniofacial samples relative to other tissue types and that is enriched for potential  
222 target genes associated with various craniofacial abnormalities (**Fig. 5b**). We obtained  
223 similar types of functional enrichments when performing k-means clustering directly on  
224 the matrix of H3K27ac signals using the same number of clusters utilized for the self-  
225 organizing map (**Supplementary Fig. 9a and Supplementary Table 6**). When we  
226 assessed the sequence content of clusters most specific for craniofacial activity, we  
227 identified enrichment of motifs for the *ALX*, *DLX*, *HOX*, and *MSX* families of transcription  
228 factors (**Supplementary Fig. 9b**).

## 229 **Identification of novel craniofacial locus control region and potential regulatory** 230 **targets**

231 Thus far, our analyses have focused on the annotation and activation state of individual  
232 genome segments in bulk. However, these enhancers likely do not operate in isolation  
233 and clusters of enhancers activated in concert have been shown to be powerful  
234 regulators of important genes for a given tissue or cell type<sup>67</sup>. To identify such enhancer  
235 clusters, we applied a sliding window approach to detect enrichment of craniofacial  
236 enhancer states relative to both randomly chosen sequences as well as those identified  
237 by Roadmap Epigenome. We identified 582 regions across the genome that



238 demonstrate high levels of craniofacial enhancer activity (**Supplementary Table 7**).  
239 These windows had an average size of ~400kb but ranged up to 2 Mb in length. In  
240 many cell types these clusters of enhancers, sometimes referred to as super  
241 enhancers, are embedded in the genome both surrounding and within the introns of  
242 their likely tissue-specific target<sup>68</sup>. Indeed, most of the windows we identified contained  
243 multiple genes and were enriched for developmental genes, including multiple *Frizzled*,  
244 *WNT*, *ALX*, *DLX*, and *TBX* family members (**Supplementary Table 8**). Interestingly, we  
245 identified 37 large windows that were located entirely in intergenic space and did not  
246 overlap a promoter region for any known genes. These windows represent potentially  
247 novel large clusters of regulatory regions, but their targets and activities are difficult to  
248 interpret using linear genomic annotations and distances. Given that studies have  
249 shown that our genome can form numerous long range interactions<sup>69,70</sup>, especially  
250 between regulatory regions, we sought to determine if any of these intergenic clusters of  
251 putative enhancers could be important for craniofacial development by identifying direct  
252 three-dimensional interactions in relevant tissues. To ensure that we were interrogating  
253 bona fide enhancer clusters, we focused our downstream efforts on regions that  
254 contained *in vivo*-validated craniofacial enhancers. We identified a single window  
255 encompassing a 450kb region located on chromosome 7 that contains five confirmed  
256 craniofacial enhancers from the Vista Enhancer Browser<sup>50</sup> (**Fig. 6a**). This region also  
257 contains a unique chromatin signature at its 3' end, where strongly active and repressed  
258 states are directly adjacent. This is most commonly observed at looping or topological  
259 domain boundaries. Indeed, long-range contact maps from human umbilical vein  
260 endothelial cells<sup>69</sup> indicate this observed chromatin state transition is a topologically  
261 associated domain (TAD) boundary (**Supplementary Fig. 10**). We tested an element  
262 annotated as a bivalent chromatin state, which is highly conserved across mammals,  
263 near this chromatin boundary for enhancer activity<sup>71</sup>. It displayed strong craniofacial and  
264 limb enhancer activity in the E11.5 mouse embryo (**Fig. 6a**). Inspection of chromatin  
265 data from Mouse ENCODE<sup>72</sup> indicate similar patterns of activation in the orthologous  
266 window, suggesting functional conservation of chromatin state in this large region  
267 (**Supplementary Fig. 11**). Having demonstrated that this region is enriched for  
268 craniofacial enhancers and active chromatin states, we sought to determine the gene(s)

269 this region interacts with and potentially regulates. This region is located between the  
270 *NPVF* and *NFE2L3* genes, neither of which appears to be active based on observed  
271 chromatin states in developing human craniofacial tissue. The next closest target is  
272 *CBX3*, which is strongly expressed in most cell types and has similar chromatin states  
273 in both our tissues and in Roadmap Epigenome. Comparisons of the mouse and human  
274 genomes revealed this window is part of a large syntenic block between the two species  
275 which stretches nearly 10 Mb in length with the *HOXA* gene cluster at its center  
276 (**Supplementary Fig. 12**). The enrichment for craniofacial enhancer annotations,  
277 harboring of six *in vivo* validated craniofacial enhancers, potential TAD boundary, and  
278 conservation both at the sequence and epigenomic level suggest this region is an  
279 important regulatory hub.

280 Two control regions, the early limb control region (ELCR) and the global control  
281 region (GCR), have been identified for the *HOXD* gene cluster that are important for  
282 regulation of the cluster's expression in the developing mammalian limb. The exact  
283 coordinates of the ELCR are unknown, but they are thought to be located in the large  
284 noncoding region adjacent to the cluster, while the GCR is approximately 250kb away,  
285 beyond the *LNP* gene<sup>73,74</sup>. No such control regions have been identified or described for  
286 the *HOXA* cluster. Furthermore, loss of at least one gene in the cluster, *HOXA2*, has  
287 been implicated in cranial neural crest skeletal morphogenesis and results in mice born  
288 with cleft palates and other craniofacial abnormalities<sup>57,75</sup>. The region we have identified  
289 is located nearly 1.5 Mb from the *HOXA* cluster and contains at least seven annotated  
290 genes in the intervening genomic sequence; thus it is not clear whether this region  
291 could regulate the *HOXA* gene cluster. Utilizing circularized chromosome conformation  
292 capture with sequencing<sup>76</sup> (4C-seq) we assessed the interactions of four viewpoints in  
293 this window in E11.5 mouse craniofacial tissue. For two viewpoints, we identified  
294 extensive interactions within the identified window that do not cross the putative TAD  
295 boundary. When we assessed viewpoints flanking the TAD boundary, one of which  
296 contained the active enhancer HACNS50<sup>71</sup>, we observed interactions within this  
297 identified region as well as significant interactions with the *HOXA* gene cluster (**Fig. 6b**).  
298 To confirm these interactions, we performed additional 4C-seq experiments utilizing  
299 viewpoints located directly within the *HOXA* cluster and the promoter of the *SKAP2*

300 gene. We observed strong interactions between both of these viewpoints and the TAD  
301 boundary of the original window. Interestingly, *HOXA* made contacts with the outer  
302 limits of this window but not within the window. These findings illustrate that the region  
303 we identified in human craniofacial tissue makes strong contacts over nearly 1.5 Mb  
304 with genes of the *HOXA* cluster in developing mouse craniofacial tissue and indicate it  
305 could be a conserved global control region important for craniofacial development.

## 306 **Discussion**

307 Our understanding of the regulation of craniofacial development and the genetic  
308 changes that give rise to developmental defects has not advanced greatly in the last  
309 decade despite it being a heavily studied area of human and mouse biology and the  
310 advent of more advanced genomic technologies. Recent large consortia efforts to  
311 identify the genetics of common disease have gained traction utilizing tissue-specific  
312 annotations of the genome to identify potential regulatory regions and overlaying  
313 genetic associations<sup>33,34</sup>. Such genetic association data exist for craniofacial  
314 abnormalities, but the lack of craniofacial-specific annotations of regulatory function  
315 have prevented systematic identification of causal genetic changes. We have  
316 addressed this need by generating an extensive resource of functional genomics data  
317 obtained directly from human craniofacial tissues during important stages of formation  
318 of the orofacial apparatus. We have uniformly processed our data to allow integration of  
319 these data with similarly generated signals from a variety of human tissues and  
320 developmental stages. These analyses have allowed us to generate craniofacial-  
321 specific annotations of chromatin states across the human genome. These chromatin  
322 state segmentations reveal tens of thousands of regions with potential gene regulatory  
323 activity in craniofacial development. Over 6000 of the enhancer segments we identified  
324 have never been annotated previously as having enhancer activity in 127 different cell  
325 types. These regions are strongly enriched near genes implicated in craniofacial  
326 development and would have remained unknown to craniofacial researchers relying  
327 solely on the current state of genome annotations. Indeed, recent targeted sequencing  
328 of GWAS intervals at 13 loci in patients affected by craniofacial abnormalities likely  
329 excluded important craniofacial regulatory regions due to the lack of appropriate

330 chromatin state annotations<sup>77</sup> (**Supplementary Fig. 13**). These findings illuminate that  
331 our current understanding of the regulatory information our genomes encode is  
332 incomplete and reinforces the need for more and higher resolution tissue-specific  
333 chromatin state annotations.

334 To illustrate the utilization of this resource we analyzed these data in many  
335 different fashions to narrow down particular regions of interest and to interrogate them  
336 for genetic and functional associations with craniofacial development. Furthermore, we  
337 demonstrated that once a region of interest has been identified, it is possible to develop  
338 a hypothesis of potential gene regulatory targets and directly test them *in vivo* in the  
339 context of both genomic and functional conservation in the mouse. Here, we chose to  
340 focus on clusters of craniofacial enhancer segments that have been functionally verified  
341 in the developing mouse embryo to ensure relevance for craniofacial biology. Our  
342 windowing approach identified an extremely dense, large array of craniofacial  
343 enhancers, suggesting we have identified an important regulatory hub. The  
344 conservation of activating histone modification signals in developing mouse craniofacial  
345 tissues indicates this region is likely important for the formation of craniofacial features  
346 in multiple species. Additionally, the identification of direct long-range interactions  
347 between portions of this unique enhancer region, including a rapidly evolving conserved  
348 non-coding sequence (HACNS50)<sup>71</sup>, with the *HOXA* gene cluster suggest this region  
349 could be important not only for normal craniofacial development but also for evolution of  
350 the human skull. Lastly, this region has been implicated as a uniquely deleted segment  
351 in a patient with facial dysgenesis<sup>78</sup> (**Supplementary Figure 10**). This patient was  
352 noted to have overtly normal organs and brain activity despite lacking most features of a  
353 face resembling other non-syndromic abnormalities caused by regulatory sequence  
354 defects<sup>23-26</sup>. Further genetic dissection of this region in cultured human cells or in the  
355 developing mouse are needed to determine the role this region plays in regulating this  
356 conserved cluster of *HOXA* genes .

357 We provide all our craniofacial functional genomics data and resulting chromatin  
358 state segmentations in several standard formats as well as a complete catalog of tracks  
359 that can be easily loaded into many modern genome browsers. Additionally, we provide  
360 our self organizing map of active enhancers across 146 samples as a website that can

361 be explored by a variety of researchers to interrogate the regions, genes, and  
362 phenotypes relevant for their research without high level computational processing or  
363 expertise.

364 ([https://cotneylab.cam.uhc.edu/~jcotney/CRANIOFACIAL\\_HUB/Craniofacial\\_H3K27ac\\_SOM/](https://cotneylab.cam.uhc.edu/~jcotney/CRANIOFACIAL_HUB/Craniofacial_H3K27ac_SOM/)). This  
365 will allow the craniofacial community to develop hypotheses related to craniofacial  
366 abnormalities which are rooted in craniofacial biology instead of using chromatin state  
367 annotations from other tissues not directly related to the tissue of interest. These  
368 resources stand to bring the craniofacial research world firmly into the functional  
369 genomics era, advance our understanding of these disorders, and provide tools for  
370 clinicians seeking to diagnose patients utilizing whole genome sequencing.

371

## 372 **Acknowledgements**

373 We would like to thank the donors to HDBR, as without them this resource would not be  
374 possible. We would also like to thank Camden Jansen and Ali Mortazavi for assistance  
375 in generation of the self-organizing map resource and Heather Adinolfi for technical  
376 assistance in the transgenic enhancer assay. Funding support was provided by an R00  
377 award from NIDCR to J.C.

## 378 **Author Contributions**

379 All ChIP experiments were performed by J.C. Sequencing libraries and sequencing runs were  
380 performed by J.K. Data analysis was performed by J.C. 4C-Seq experiments and analysis were  
381 performed by A.W. Writing and data interpretation were performed by all authors.

## 382 **Data and Code Availability**

383 All data can be visualized in the UCSC Genome Browser using track hub functionality. Hub files  
384 and interesting browser examples can be found on our website:  
385 <http://cotney.research.uhc.edu/data/>

386

387 ChIP-Seq signals, peak calls, chromatin state segmentations and 4C-Seq data are available at  
388 GEO accessions GSE98251 and GSE97752.

389

390 All generic scripts used in processing ChIP-Seq and generating chromatin states are available  
391 on github: <https://github.com/cotneylab/ChIP-Seq>

392

393 All generic scripts for processing of 4C-Seq data from mouse are available on github:  
394 <https://github.com/cotneylab/Mouse-HOXA-4C-Seq>

395

## 396 **Methods**

### 397 **Tissue Collection and fixation**

398 Use of human fetal tissue was reviewed and approved by the Human Subjects Protection  
399 Program at UConn Health. Human embryonic craniofacial tissue was collected, staged and  
400 provided by the Joint MRC/Wellcome Trust Human Developmental Biology Resource  
401 ([www.hdbr.org](http://www.hdbr.org)). Tissues were flash frozen upon collection and stored at -80°C. Fixation for  
402 ChIP-Seq was performed as described in Cotney and Noonan, 2015<sup>79</sup>. Briefly, each tissue  
403 sample was rapidly thawed in 1 mL of ice cold phosphate buffered saline (PBS) and briefly  
404 homogenized with a disposable plastic pestle in a 1.5 mL microcentrifuge tube. Samples were  
405 then fixed by the addition of formaldehyde to a final concentration of 1% and incubated at room  
406 temperature on a rotisserie for 15 minutes. Samples were then quenched with 150 mM glycine  
407 at 10 minutes at room temperature. Tissue was collected by centrifugation (5 min, 2500g, 4°C)  
408 and washed with 1 mL of fresh PBS. Fixed tissue pellets were then rapidly frozen in a dry  
409 ice/alcohol bath and stored at -80°C until batch processing for chromatin immunoprecipitation  
410 (ChIP).

### 411 **Antibody Specifications**

412 Antibodies used in this study: anti-H3K27ac (ab4729, Abcam), anti-H3K4me1 (ab8895, Abcam),  
413 anti-H3K4me2 (ab7777, Abcam), anti-H3K4me3 (ab8580, Abcam), anti-H3K27me3 (07-449,  
414 EMD Millipore), anti-H3K36me3 (ab9050, Abcam).

### 415 **ChIP-Seq**

416 Fixed tissue pellets were processed for ChIP as previously described<sup>79</sup>. Briefly, samples were  
417 thawed in 1 mL of 1x Cell Lysis buffer and incubated on ice for 20 minutes. Cells were lysed  
418 with dounce homogenization and nuclei were collected by centrifugation (5 min, 2500g, 4°C).



419 Nuclei were resuspended in 300  $\mu$ L of 1x Nuclear Lysis buffer + 0.3% SDS + 2 mM sodium  
420 butyrate and incubated on ice for 20 minutes. Chromatin was sheared with a Qsonica Q800R1  
421 sonicator system operating at amplitude 20 and 2 $\square$  for 30 minutes (10 seconds duty, 10  
422 seconds rest). Samples were cleared by centrifugation (5 min, 20,000g, 4 $\square$ ) and soluble  
423 chromatin was transferred equally into six separate tubes with 10% reserved as an input control.  
424 SDS concentration was reduced to 0.18% with ChIP Dilution buffer. Protein G Dynabeads  
425 (ThermoFisher) separately preloaded with 2  $\mu$ g of antibodies listed above were added to each  
426 chromatin aliquot. ChIP samples were incubated overnight at 4 $\square$  on a rotisserie. Chromatin was  
427 then immunoprecipitated on a magnet and supernatant was discarded. Beads were washed 8  
428 times with 1 mL of 500 mM LiCl ChIP-Seq Wash Buffer and once with 1 mL of TE. Chromatin  
429 was eluted from the beads twice with ChIP Elution buffer at 65 $\square$  for 10 minutes with constant  
430 agitation. Combined eluates for each ChIP were subjected to crosslink reversal overnight at  
431 65 $\square$ . Samples were then sequentially treated with RNAse A and proteinase K, purified with a  
432 PCR Purification Kit (Qiagen), and eluted in 50  $\mu$ L of EB. ChIP samples were then quantified  
433 with picoGreen (ThermoFisher) and prepared for sequencing on Illumina instruments using the  
434 ThruPLEX 48S Library Prep kit (Rubicon Genomics) according to manufacturer's instructions.  
435 Final libraries were quantified by QPCR (NEBNext Library Quant Kit for Illumina), multiplexed,  
436 and sequenced for 75 cycles across multiple flow cells on an Illumina NextSeq 500 instrument.

### 437 **Primary ChIP-Seq Data Analysis**

438 Sequencing data was directly retrieved from Illumina's BaseSpace Cloud service using  
439 Basemount command line tools provided by Illumina. Multiple FASTQs for each ChIP were  
440 combined and assessed for quality using FASTQC (v0.11.2)<sup>80</sup> and compared visually using  
441 MultiQC (v0.9)<sup>81</sup>. Reads were then aligned to the human genome (hg19) using Bowtie2  
442 (v2.2.5)<sup>82</sup> keeping only uniquely mapped reads. Fragment sizes of each library were estimated  
443 using PhantomPeakQualTools (v.1.14)<sup>47</sup>. Histone modification enriched regions were identified  
444 and annotated using HOMER (v4.8.3)<sup>83</sup>. Reproducibly enriched regions were determined by  
445 creating a union of all enriched regions for a respective histone modification from all replicates  
446 of a single Carnegie stage and filtering for regions identified in at least two biological replicates  
447 using BEDtools (v2.25.0)<sup>84</sup>. We then generated p-value based signal tracks relative to  
448 appropriate input controls based on estimated library fragment size using MACS2  
449 (2.1.1.20160309)<sup>48</sup>. All signal and enriched region files were converted for display in the UCSC  
450 Genome Browser using the Kent Source Tools (v329)<sup>85</sup>. Correlations of ChIP-Seq signals and

451 Principal Component Analysis across samples and marks were calculated in non-overlapping  
452 10kb windows using deepTools2 (v2.5.0.1)<sup>86</sup>.

### 453 **Roadmap Epigenome Data Retrieval**

454 Aligned and consolidated primary ChIP-Seq reads in tagAlign format were retrieved from  
455 Roadmap Epigenome for eleven epigenomic signals: H2A.Z, H3K4me1, H3K4me2, H3K4me3,  
456 H3K9ac, H3K9me3, H3K27ac, H3K27me3, H3K36me3, H3K79me2, and H4K20me1.  
457 (<http://egg2.wustl.edu/roadmap/data/byFileType/alignments/consolidated/>). To ensure the most  
458 compatible signals with our data, p-value signals were generated by MACS2 from these data  
459 based on library fragment sizes reported by Roadmap Epigenome as above. DNase p-value  
460 signals were retrieved directly from Roadmap Epigenome  
461 (<http://egg2.wustl.edu/roadmap/data/byFileType/signal/consolidated/macs2signal/pval/>) and  
462 converted from bigWig to bedGraph for use with ChromImpute<sup>49</sup> using Kent Source Tools<sup>85</sup>.  
463 Chromatin state segmentations for 127 epigenomes and associated 15-, 18-, and 25-state  
464 model files were retrieved from Roadmap Epigenome  
465 (<http://egg2.wustl.edu/roadmap/data/byFileType/chromhmmSegmentations/ChmmModels/>).

### 466 **Chromatin Imputation**

467 Bedgraph files for all p-value signals from primary ChIP-Seq data were converted to 25 bp  
468 resolution and processed for model training and generation of imputed signals for all samples  
469 using ChromImpute (v1.0.1) as previously described<sup>49</sup>. Resulting imputed signal tracks were  
470 converted to bigWig format for display in UCSC genome browser and converted to combined  
471 signal format at 200 bp resolution for use with ChromHMM (v1.12)<sup>44</sup> using deepTools2<sup>86</sup>.

### 472 **Chromatin State Segmentation**

473 Signal files for individual chromosomes for each craniofacial epigenome were binarized and  
474 segmentation was performed using previously published joint 15-, 18-, and 25-state chromatin  
475 models using ChromHMM as previously described<sup>22</sup>. Following segmentation, annotation of  
476 states and generation of genome browser files was performed based on annotations provided  
477 by Roadmap Epigenome. Individual models of 15, 18 and 25 chromatin states were also  
478 learned for each craniofacial epigenome using default settings in ChromHMM. Pearson  
479 Correlations and Principal Component Analyses were performed on total H3K27ac signals  
480 extracted observed in all imputed p-value signal tracks for craniofacial and Roadmap

481 Epigenome samples from the union of all enhancer state segmentations (EnhA1, EnhA2,  
482 EnhAF, EnhW1, EnhW2, and EnhAc) using deepTools2<sup>86</sup>. All plots were made using tabular  
483 data generated by deepTools2 in R (v3.3.3)<sup>87</sup>.

## 484 **Functional Enrichments in Craniofacial Epigenomes**

485 Craniofacial enhancer state segmentations (EnhA1, EnhA2, EnhAF, EnhW1, EnhW2, and  
486 EnhAc) were interrogated for tissue activity in the developing mouse embryo from the Vista  
487 Enhancer Browser<sup>50</sup>. Significance of overlap of enhancers identified in human craniofacial tissue  
488 and shown to be active in mouse craniofacial tissue relative to all other tissue annotations was  
489 determined using Fisher's exact test. To identify totally novel craniofacial enhancers, enhancer  
490 state segmentations for all craniofacial segmentations were interrogated for single base overlap  
491 with the same states from all Roadmap Epigenomes using BEDtools<sup>84</sup>. These novel craniofacial  
492 enhancer segmentations were assessed for gene ontology and functional enrichments based on  
493 assigned target genes using GREAT (v3.0.0)<sup>58</sup>. Genes identified as transcriptional regulators by  
494 GREAT were assessed for enrichment of anatomical expression using default parameters in  
495 GeneORGANizer<sup>88</sup>. Sequence from novel craniofacial enhancer segmentations was extracted  
496 from hg19 using fastaFromBed within BEDTools<sup>84</sup>. The resulting sequences were assessed for  
497 transcription factor motif enrichment using HOMER<sup>83</sup>. Enhancer state segmentations from  
498 craniofacial epigenomes and all Roadmap epigenomes were interrogated for significance of  
499 overlap with GWAS tag SNPs associated with orofacial clefting and craniofacial  
500 morphology<sup>17,21,59-63</sup> obtained from the GWAS Catalog (retrieved 2017-02-20)<sup>89</sup> using Fisher's  
501 exact test within BEDTools<sup>84</sup>.

## 502 **Self-Organizing Maps of Enhancer Activation**

503 The self-organizing map of H3K27ac signal at all enhancer segments was generated as  
504 previously described<sup>66</sup>. Briefly, a union of all enhancer segmentations from craniofacial tissues  
505 and all samples in Roadmap Epigenome was generated and merged to form a consistent  
506 annotation of enhancers across the entire genome resulting in 425380 individual enhancer  
507 segments. H3K27ac signals from imputed p-value signal tracks for each of the 146 epigenomes  
508 were extracted for each of the 425380 enhancer segments. This matrix was then used to train a  
509 self-organizing map with 50 rows and 50 columns (2500 units) to allow for the possibility of  
510 small numbers of highly tissue-specific enhancers (<200) to be clustered together. We  
511 performed 50 training trials and retained the best scoring map. For this final self-organizing map

512 we then annotated each unit with Ensembl (v75) genes based on association rules defined by  
513 GREAT<sup>58</sup>. Based on these unit/gene assignments we then determined enrichment of gene  
514 ontologies (<http://geneontology.org/ontology/go.obo>) and human phenotype ontologies from the  
515 Monarch Initiative<sup>90</sup> (<http://purl.obolibrary.org/obo/hp.obo>) as previously described<sup>91</sup>. Clusters of  
516 units, or metaclusters, were then determined with four separate trials testing for the presence of  
517 up to 250 metaclusters as previously described<sup>66</sup>. The algorithm converged on 199 clusters as  
518 optimal for the self-organizing map generated above. Metaclusters were then assessed for  
519 functional enrichments as was done for individual units above. Metaclusters identified as  
520 specific for craniofacial and brain tissues were visualized using a JavaScript web-based viewer  
521 of the self-organizing map available here:  
522 [https://cotneylab.cam.uchc.edu/~jcotney/CRANIOFACIAL\\_HUB/Craniofacial\\_H3K27ac\\_SOM/](https://cotneylab.cam.uchc.edu/~jcotney/CRANIOFACIAL_HUB/Craniofacial_H3K27ac_SOM/)

### 523 **K-means clustering of Enhancer Activation**

524 K-means clustering of the same H3K27ac signal matrix utilized for the self-organizing map was  
525 performed using Cluster (v3.0)<sup>92</sup>. Rows were centered on the mean value of the row and  
526 normalized, the number of metaclusters identified in the self-organizing map analysis above was  
527 used as the k parameter, and 100 runs were performed. The clustering result was then  
528 visualized and craniofacial-specific clusters were extracted using Java TreeView<sup>93</sup>. Sequences  
529 underlying the enhancers in the craniofacial-specific clusters were extracted as above for novel  
530 craniofacial enhancers. We performed motif enrichment within these sequences using a  
531 combination of multiple tools for more robust enrichment determination<sup>94</sup>. Functional enrichment  
532 for these enhancers was determined as above using GREAT<sup>58</sup>.

### 533 **Identification of Enhancer Clusters**

534 To identify clusters of craniofacial enhancers we first generated overlapping 200kb windows  
535 with a 50kb step size<sup>84</sup>. Next, we intersected these windows with all enhancer chromatin state  
536 segmentations from craniofacial tissues. We then calculated the fraction of each window  
537 annotated as an enhancer state. We tested for enrichment of enhancers in each window using  
538 permutation testing by randomly shuffling the craniofacial enhancer segments across the  
539 genome 1000 times using BEDtools<sup>84</sup> and determining the fraction of each window annotated as  
540 an enhancer. Overlapping windows of significant enrichment were merged into a single  
541 contiguous region. Final enriched regions were assessed for overlap with gene annotations and  
542 validated craniofacial enhancers using BEDtools<sup>84</sup>.

## 543 **Transgenic Enhancer Assay**

544 A 2.6 kb segment centered on the conserved sequence corresponding to HACNS50<sup>71</sup> was  
545 amplified from human genomic DNA by polymerase chain reaction (PCR) using the following  
546 primers: HACNS50 F 5'-CACCCCATTTCTGAGGGGAAATAA-3', HACNS50 R 5'-  
547 TTATTTCTTCAGGCCCTTG-3', and cloned into an Hsp68-lacZ reporter vector as previously  
548 described<sup>95</sup>. Generation of transgenic mice at the Yale University Transgenic Mouse Facility and  
549 embryo staining were carried out as previously described<sup>95</sup>. We required reporter gene  
550 expression in a given structure to be present in at least three independent transgenic embryos  
551 as assessed by two researchers to be considered reproducible.

552

## 553 **Circularized Chromosome Conformation Capture with Sequencing (4C-Seq)**

554 All animal work was done in accordance with approved University of Connecticut Health Center  
555 IACUC protocols. 4C-seq was performed according to van de Werken et al. (2012)<sup>76</sup> with  
556 modifications for tissue. Input mouse embryonic craniofacial and brain tissue from the same  
557 litter was fixed and nuclei isolated following homogenization with a dounce tissue grinder as  
558 described<sup>79</sup>. Each replicate consists of tissue from an individual litter. Subsequent digestion and  
559 ligation steps were followed from van de Werken et al. (2012)<sup>76</sup>. Chromatin was digested  
560 sequentially with NlaIII and DpnII. Amplification of final libraries was performed with primers  
561 selected using a primer database generated for NlaIII/DpnII digestion as previously described<sup>76</sup>.  
562 The sequences added to these primers were modified to allow hybridization to NextSeq 500  
563 flow cells and split across two sets of primers to improve efficiency and allow for dense  
564 multiplexing (Table S9).

## 565 **4C-seq Data Analysis**

566 4C-seq libraries were sequenced for 75 cycles using the NextSeq500 (Illumina). Fastq files  
567 were demultiplexed by barcode yielding Fastq files for each tissue replicate. Tissue replicate  
568 Fastq files were further demultiplexed by viewpoint using Cutadapt (v1.8.3)<sup>96</sup>. Trimmed reads  
569 were uniquely aligned to mm9 using bowtie2<sup>82</sup>. Significant interactions in craniofacial tissue  
570 were assessed using r3Cseq<sup>97</sup> with a modification allowing a larger viewing window near the  
571 viewpoint (<https://github.com/cotneylab/r3Cseq>) and using brain as a control. The significant  
572 interactions are represented in the accompanying track hub as bigBed files. The location of the  
573 viewpoint and sequenced interacting fragment are denoted with thick bars. A thin bar is included  
574 to denote the connection between the viewpoint and the distal sites.

## 575 References

576

- 577 1. Schoenwolf, G.C., Bleyl, S.B., Brauer, P.R. & Francis-West, P.H. *Larsen's Human*  
578 *Embryology*, 687 (Churchill Livingstone/Elsevier, Ann Arbor, MI, 2009).
- 579 2. World Health Organization. *World Atlas of Birth Defects*, 237 (World Health  
580 Organization, Geneva, Switzerland, 2003).
- 581 3. Mossey, P.A. & Modell, B. Epidemiology of oral clefts 2012: an international perspective.  
582 *Frontiers of oral biology* **16**, 1-18 (2012).
- 583 4. Wehby, G.L., Pedersen, D.A., Murray, J.C. & Christensen, K. The effects of oral clefts on  
584 hospital use throughout the lifespan. *BMC health services research* **12**, 58 (2012).
- 585 5. Wehby, G.L. *et al.* The effect of systematic pediatric care on neonatal mortality and  
586 hospitalizations of infants born with oral clefts. *BMC pediatrics* **11**, 1307-1321 (2011).
- 587 6. Boulet, S.L., Grosse, S.D., Honein, M.A. & Correa-Villaseñor, A. Children with orofacial  
588 clefts: health-care use and costs among a privately insured population. *Public health*  
589 *reports (Washington, D.C. : 1974)* **124**, 447-453 (2009).
- 590 7. Wehby, G.L. & Cassell, C.H. The impact of orofacial clefts on quality of life and  
591 healthcare use and costs. *Oral diseases* **16**, 3-10 (2010).
- 592 8. Grosen, D. *et al.* Risk of oral clefts in twins. *Epidemiology (Cambridge, Mass.)* **22**, 313-  
593 319 (2011).
- 594 9. Grosen, D. *et al.* A cohort study of recurrence patterns among more than 54 000  
595 relatives of oral cleft cases in Denmark: support for the multifactorial threshold model of  
596 inheritance. *Journal of Medical Genetics* **47**, 162-168 (2010).
- 597 10. Beaty, T.H., Marazita, M.L. & Leslie, E.J. Genetic factors influencing risk to orofacial  
598 clefts: today's challenges and tomorrow's opportunities. *F1000Research* **5**, 2800-10  
599 (2016).
- 600 11. Camargo, M. *et al.* GWAS reveals new recessive loci associated with non-syndromic  
601 facial clefting. *European journal of medical genetics* **55**, 510-514 (2012).
- 602 12. Ludwig, K.U. *et al.* Imputation of Orofacial Clefting Data Identifies Novel Risk Loci and  
603 Sheds Light on the Genetic Background of Cleft Lip ± Cleft Palate and Cleft Palate Only.  
604 *Human molecular genetics*, ddx012 (2017).
- 605 13. Ludwig, K.U. *et al.* Meta-analysis Reveals Genome-Wide Significance at 15q13 for  
606 Nonsyndromic Clefting of Both the Lip and the Palate, and Functional Analyses Implicate  
607 GREM1 As a Plausible Causative Gene. *PLoS genetics* **12**, e1005914 (2016).
- 608 14. Lidral, A.C. *et al.* A single nucleotide polymorphism associated with isolated cleft lip and  
609 palate, thyroid cancer and hypothyroidism alters the activity of an oral epithelium and  
610 thyroid enhancer near FOXE1. *Human molecular genetics* **24**, 3895-3907 (2015).
- 611 15. Conte, F. *et al.* Systematic analysis of copy number variants of a large cohort of orofacial  
612 cleft patients identifies candidate genes for orofacial clefts. *Human genetics*, 1-19  
613 (2015).
- 614 16. Bureau, A. *et al.* Whole Exome Sequencing of Distant Relatives in Multiplex Families  
615 Implicates Rare Variants in Candidate Genes for Oral Clefts. *Genetics* **197**, 1039-1044  
616 (2014).
- 617 17. Ludwig, K.U. *et al.* Genome-wide meta-analyses of nonsyndromic cleft lip with or without  
618 cleft palate identify six new risk loci. *Nature genetics* **44**, 968-971 (2012).
- 619 18. Yuan, Q., Blanton, S.H. & Hecht, J.T. Association of ABCA4 and MAFB with  
620 non-syndromic cleft lip with or without cleft palate. *American journal of medical genetics*  
621 *Part A* **155**, 1469-1471 (2011).
- 622 19. Letra, A. *et al.* Novel cleft susceptibility genes in chromosome 6q. *Journal of dental*  
623 *research* **89**, 927-932 (2010).



- 624 20. Beaty, T.H. *et al.* A genome-wide association study of cleft lip with and without cleft  
625 palate identifies risk variants near MAFB and ABCA4. *Nature genetics* **42**, 525-529  
626 (2010).
- 627 21. Mangold, E. *et al.* Genome-wide association study identifies two susceptibility loci for  
628 nonsyndromic cleft lip with or without cleft palate. *Nature genetics* **42**, 24-26 (2010).
- 629 22. Consortium, R.E. *et al.* Integrative analysis of 111 reference human epigenomes. *Nature*  
630 **518**, 317-330 (2015).
- 631 23. Petit, F. *et al.* The disruption of a novel limb cis-regulatory element of SHH is associated  
632 with autosomal dominant preaxial polydactyly-hypertrichosis. **24**, 37-43 (2015).
- 633 24. Sagai, T., Hosoya, M., Mizushina, Y., Tamura, M. & Shiroishi, T. Elimination of a long-  
634 range cis-regulatory module causes complete loss of limb-specific Shh expression and  
635 truncation of the mouse limb. *Development (Cambridge, England)* **132**, 797-803 (2005).
- 636 25. Lettice, L.A. *et al.* A long-range Shh enhancer regulates expression in the developing  
637 limb and fin and is associated with preaxial polydactyly. *Human molecular genetics* **12**,  
638 1725-1735 (2003).
- 639 26. Weedon, M.N. *et al.* Recessive mutations in a distal PTF1A enhancer cause isolated  
640 pancreatic agenesis. *Nature genetics* **46**, 61-64 (2014).
- 641 27. Leslie, E.J. & Marazita, M.L. Genetics of Orofacial Cleft Birth Defects. *Current Genetic*  
642 *Medicine Reports*, 1-9 (2015).
- 643 28. Khandelwal, K.D., Van Bokhoven, H., Roscioli, T., Carels, C.E.L. & Zhou, H. Genomic  
644 approaches for studying craniofacial disorders. *American journal of medical genetics.*  
645 *Part C, Seminars in medical genetics* **163C**, 218-231 (2013).
- 646 29. Rahimov, F., Jugessur, A. & Murray, J.C. Genetics of nonsyndromic orofacial clefts. *The*  
647 *Cleft palate-craniofacial journal : official publication of the American Cleft Palate-*  
648 *Craniofacial Association* **49**, 73-91 (2012).
- 649 30. Dixon, M.J., Marazita, M.L., Beaty, T.H. & Murray, J.C. Cleft lip and palate:  
650 understanding genetic and environmental influences. *Nature reviews Genetics* **12**, 167-  
651 178 (2011).
- 652 31. Visel, A. *et al.* ChIP-seq accurately predicts tissue-specific activity of enhancers. *Nature*  
653 **457**, 854-858 (2009).
- 654 32. Zhu, J. *et al.* Genome-wide chromatin state transitions associated with developmental  
655 and environmental cues. *Cell* **152**, 642-654 (2013).
- 656 33. Farh, K.K.-H. *et al.* Genetic and epigenetic fine mapping of causal autoimmune disease  
657 variants. *Nature* **518**, 337-343 (2015).
- 658 34. Pasquali, L. *et al.* Pancreatic islet enhancer clusters enriched in type 2 diabetes risk-  
659 associated variants. *Nature genetics* **46**, 136-143 (2014).
- 660 35. Ernst, J. *et al.* Mapping and analysis of chromatin state dynamics in nine human cell  
661 types. *Nature* **473**, 43-49 (2011).
- 662 36. Reilly, S.K. *et al.* Evolutionary genomics. Evolutionary changes in promoter and  
663 enhancer activity during human corticogenesis. *Science (New York, NY)* **347**, 1155-1159  
664 (2015).
- 665 37. Cotney, J. *et al.* The evolution of lineage-specific regulatory activities in the human  
666 embryonic limb. *Cell* **154**, 185-196 (2013).
- 667 38. Villar, D. *et al.* Enhancer Evolution across 20 Mammalian Species. *Cell* **160**, 554-566  
668 (2015).
- 669 39. Nord, A.S. *et al.* Rapid and Pervasive Changes in Genome-wide Enhancer Usage during  
670 Mammalian Development. *Cell* **155**, 1521-1531 (2013).
- 671 40. Barozzi, I. *et al.* Genome-wide compendium and functional assessment of in vivo heart  
672 enhancers. *Nature Communications* **7**, 1-13 (2016).

- 673 41. Kumar, V. *et al.* Comprehensive benchmarking reveals H2BK20 acetylation as a  
674 distinctive signature of cell-state-specific enhancers and promoters. *Genome research*  
675 **26**, 612-623 (2016).
- 676 42. Bonn, S. *et al.* Tissue-specific analysis of chromatin state identifies temporal signatures  
677 of enhancer activity during embryonic development. *Nature genetics* **44**, 148-156 (2012).
- 678 43. Cotney, J.L. *et al.* Chromatin state signatures associated with tissue-specific gene  
679 expression and enhancer activity in the embryonic limb. *Genome research* **22**, 1069-  
680 1080 (2012).
- 681 44. Ernst, J. & Kellis, M. ChromHMM: automating chromatin-state discovery and  
682 characterization. *Nature Methods* **9**, 215-216 (2012).
- 683 45. Hoffman, M.M. *et al.* Unsupervised pattern discovery in human chromatin structure  
684 through genomic segmentation. *Nature Methods* **9**, 473-476 (2012).
- 685 46. Hoffman, M.M. *et al.* Integrative annotation of chromatin elements from ENCODE data.  
686 *Nucleic Acids Research* **41**, 827-841 (2013).
- 687 47. Landt, S.G. *et al.* ChIP-seq guidelines and practices of the ENCODE and modENCODE  
688 consortia. *Genome research* **22**, 1813-1831 (2012).
- 689 48. Feng, J., Liu, T., Qin, B., Zhang, Y. & Liu, X.S. Identifying ChIP-seq enrichment using  
690 MACS. *Nature protocols* **7**, 1728-1740 (2012).
- 691 49. Ernst, J. & Kellis, M. Large-scale imputation of epigenomic datasets for systematic  
692 annotation of diverse human tissues. *Nature Biotechnology* **33**, 364-376 (2015).
- 693 50. Visel, A., Minovitsky, S., Dubchak, I. & Pennacchio, L.A. VISTA Enhancer Browser--a  
694 database of tissue-specific human enhancers. *Nucleic Acids Research* **35**, D88-92  
695 (2007).
- 696 51. Marchegiani, S. *et al.* Recurrent Mutations in the Basic Domain of TWIST2 Cause  
697 Ablepharon Macrostomia and Barber-Say Syndromes. *The American Journal of Human*  
698 *Genetics* **97**, 99-110 (2015).
- 699 52. Sharma, V.P. *et al.* Mutations in TCF12, encoding a basic helix-loop-helix partner of  
700 TWIST1, are a frequent cause of coronal craniosynostosis. *Nature genetics* **45**, 304-307  
701 (2013).
- 702 53. Chen, H. *et al.* Multiple calvarial defects in *lmx1b* mutant mice. *Developmental genetics*  
703 **22**, 314-320 (1998).
- 704 54. Laclef, C., Souil, E., Demignon, J. & Maire, P. Thymus, kidney and craniofacial  
705 abnormalities in *Six1* deficient mice. *Mechanisms of development* **120**, 669-679 (2003).
- 706 55. Brunskill, E.W. *et al.* A gene expression atlas of early craniofacial development.  
707 *Developmental Biology* **391**, 133-146 (2014).
- 708 56. Zhao, Y. *et al.* Isolated cleft palate in mice with a targeted mutation of the LIM homeobox  
709 gene *lhx8*. *Proceedings of the National Academy of Sciences* **96**, 15002-15006 (1999).
- 710 57. Gendron-Maguire, M., Mallo, M., Zhang, M. & Gridley, T. *Hoxa-2* mutant mice exhibit  
711 homeotic transformation of skeletal elements derived from cranial neural crest. *Cell* **75**,  
712 1317-1331 (1993).
- 713 58. Mclean, C.Y. *et al.* GREAT improves functional interpretation of cis-regulatory regions.  
714 *Nature Biotechnology* **28**, 495-501 (2010).
- 715 59. Shi, M. *et al.* Genome wide study of maternal and parent-of-origin effects on the etiology  
716 of orofacial clefts. *American journal of medical genetics Part A* **158A**, 784-794 (2012).
- 717 60. Birnbaum, S. *et al.* Key susceptibility locus for nonsyndromic cleft lip with or without cleft  
718 palate on chromosome 8q24. *Nature genetics* **41**, 473-477 (2009).
- 719 61. Beaty, T.H. *et al.* Evidence for gene-environment interaction in a genome wide study of  
720 nonsyndromic cleft palate. *Genetic epidemiology* **35**, 469-478 (2011).
- 721 62. Grant, S.F.A. *et al.* A genome-wide association study identifies a locus for nonsyndromic  
722 cleft lip with or without cleft palate on 8q24. *The Journal of pediatrics* **155**, 909-913  
723 (2009).

- 724 63. Shaffer, J.R. *et al.* Genome-Wide Association Study Reveals Multiple Loci Influencing  
725 Normal Human Facial Morphology. *PLoS genetics* **12**, e1006149-21 (2016).
- 726 64. Zuccherro, T.M. *et al.* Interferon Regulatory Factor 6 (IRF6) Gene Variants and the Risk  
727 of Isolated Cleft Lip or Palate. *dx.doi.org* (2009).
- 728 65. Rahimov, F. *et al.* Disruption of an AP-2alpha binding site in an IRF6 enhancer is  
729 associated with cleft lip. *Nature genetics* **40**, 1341-1347 (2008).
- 730 66. Mortazavi, A. *et al.* Integrating and mining the chromatin landscape of cell-type  
731 specificity using self-organizing maps. *Genome research* **23**, 2136-2148 (2013).
- 732 67. Whyte, W.A. *et al.* Master transcription factors and mediator establish super-enhancers  
733 at key cell identity genes. *Cell* **153**, 307-319 (2013).
- 734 68. Hnisz, D. *et al.* Super-Enhancers in the Control of Cell Identity and Disease. *Cell* **155**,  
735 934-947 (2013).
- 736 69. Rao, S.S.P. *et al.* A 3D Map of the Human Genome at Kilobase Resolution Reveals  
737 Principles of Chromatin Looping. *Cell* **159**, 1665-1680 (2014).
- 738 70. Lieberman-Aiden, E. *et al.* Comprehensive mapping of long-range interactions reveals  
739 folding principles of the human genome. *Science (New York, NY)* **326**, 289-293 (2009).
- 740 71. Prabhakar, S. *et al.* Human-Specific Gain of Function in a Developmental Enhancer.  
741 *Science (New York, NY)* **321**, 1346-1350 (2008).
- 742 72. Yue, F. *et al.* A comparative encyclopedia of DNA elements in the mouse genome.  
743 *Nature* **515**, 355-364 (2014).
- 744 73. Zákány, J., Kmita, M. & Duboule, D. A Dual Role for Hox Genes in Limb Anterior-  
745 Posterior Asymmetry. *Science (New York, NY)* **304**, 1669-1672 (2004).
- 746 74. Spitz, F., Gonzalez, F. & Duboule, D. A global control region defines a chromosomal  
747 regulatory landscape containing the HoxD cluster. *Cell* **113**, 405-417 (2003).
- 748 75. Santagati, F. Temporal requirement of Hoxa2 in cranial neural crest skeletal  
749 morphogenesis. *Development (Cambridge, England)* **132**, 4927-4936 (2005).
- 750 76. van de Werken, H.J.G. *et al.* Robust 4C-seq data analysis to screen for regulatory DNA  
751 interactions. *Nature Methods* **9**, 969-972 (2012).
- 752 77. Leslie, E.J. *et al.* Identification of Functional Variants for Cleft Lip with or without Cleft  
753 Palate in or near PAX7, FGFR2, and NOG by Targeted Sequencing of GWAS Loci.  
754 *American journal of human genetics* **96**, 397-411 (2015).
- 755 78. Hoover-Fong, J.E. *et al.* Facial dysgenesis: A novel facial syndrome with chromosome 7  
756 deletion p15.1-21.1. *American Journal of Medical Genetics* **117A**, 47-56 (2003).
- 757 79. Cotney, J.L. & Noonan, J.P. Chromatin immunoprecipitation with fixed animal tissues  
758 and preparation for high-throughput sequencing. *Cold Spring Harbor protocols* **2015**,  
759 191-199 (2015).
- 760 80. Andrews, S. FastQC: a quality control tool for high throughput sequence data. in  
761 *Genome Biology* (2010).
- 762 81. Ewels, P., Magnusson, M., Lundin, S. & Käller, M. MultiQC: summarize analysis results  
763 for multiple tools and samples in a single report. *Bioinformatics (Oxford, England)* **32**,  
764 3047-3048 (2016).
- 765 82. Langmead, B. & Salzberg, S.L. Fast gapped-read alignment with Bowtie 2. *Nature*  
766 *Methods* **9**, 357-359 (2012).
- 767 83. Heinz, S. *et al.* Simple combinations of lineage-determining transcription factors prime  
768 cis-regulatory elements required for macrophage and B cell identities. *Molecular Cell* **38**,  
769 576-589 (2010).
- 770 84. Quinlan, A.R. & Hall, I.M. BEDTools: a flexible suite of utilities for comparing genomic  
771 features. *Bioinformatics (Oxford, England)* **26**, 841-842 (2010).
- 772 85. Kent, W.J. *et al.* The human genome browser at UCSC. *Genome research* **12**, 996-1006  
773 (2002).

- 774 86. Ramírez, F., Dündar, F., Diehl, S., Grüning, B.A. & Manke, T. deepTools: a flexible  
775 platform for exploring deep-sequencing data. *Nucleic Acids Research* **42**, W187-91  
776 (2014).
- 777 87. R Core Team. R: A language and environment for statistical computing. v3.3.3 edn (R  
778 Foundation for Statistical Computing, Vienna, Austria, 2017).
- 779 88. Gokhman, D. *et al.* Gene ORGANizer: Linking Genes to the Organs They Affect.  
780 *bioRxiv*, 106948 (2017).
- 781 89. Welter, D. *et al.* The NHGRI GWAS Catalog, a curated resource of SNP-trait  
782 associations. *Nucleic Acids Research* **42**, D1001-6 (2014).
- 783 90. McMurry, J.A. *et al.* Navigating the Phenotype Frontier: The Monarch Initiative. *Genetics*  
784 **203**, 1491-1495 (2016).
- 785 91. Mortazavi, A., Thompson, E.C.L., Garcia, S.T., Myers, R.M. & Wold, B. Comparative  
786 genomics modeling of the NRSF/REST repressor network: From single conserved sites  
787 to genome-wide repertoire. *Genome research* **16**, 1208-1221 (2006).
- 788 92. de Hoon, M.J.L., Imoto, S., Nolan, J. & Miyano, S. Open source clustering software.  
789 *Bioinformatics (Oxford, England)* **20**, 1453-1454 (2004).
- 790 93. Saldanha, A.J. Java Treeview--extensible visualization of microarray data.  
791 *Bioinformatics (Oxford, England)* **20**, 3246-3248 (2004).
- 792 94. Kheradpour, P. & Kellis, M. Systematic discovery and characterization of regulatory  
793 motifs in ENCODE TF binding experiments. *Nucleic Acids Research* **42**, 2976-2987  
794 (2014).
- 795 95. Visel, A. *et al.* Ultraconservation identifies a small subset of extremely constrained  
796 developmental enhancers. *Nature genetics* **40**, 158-160 (2008).
- 797 96. Martin, M. Cutadapt removes adapter sequences from high-throughput sequencing  
798 reads. *EMBnet.journal* **17**, pp. 10-12 (2011).
- 799 97. Thongjuea, S., Stadhouders, R., Grosveld, F.G., Soler, E. & Lenhard, B. r3Cseq: an  
800 R/Bioconductor package for the discovery of long-range genomic interactions from  
801 chromosome conformation capture and next-generation sequencing data. *Nucleic Acids*  
802 *Research* **41**, e132-e132 (2013).
- 803

## 804 **Figure Legends**

805 **Figure 1. Overview of Epigenomic Profiling of Early Human Craniofacial Development. a.**  
806 Stages and craniofacial tissues (orange shading) of human embryonic development sampled in  
807 this study indicated as Carnegie Stages (CS) or approximate post-conception weeks (pcw).  
808 Voids or cleavages in the embryo are indicated by black shaded regions. **b.** Six post-  
809 translational modifications of histones were profiled in parallel from individual human embryos  
810 via ChIP-Seq. **c.** Signals from primary ChIP-Seq data were imputed using ChromImpute<sup>49</sup> to  
811 match the 12 epigenomic signals profiled by Roadmap Epigenome<sup>22</sup>. Asterisks indicate signals  
812 containing only imputed data. These imputed datasets were then used to predict chromatin  
813 states using a Hidden Markov Model approach (ChromHMM)<sup>44</sup> across the genome for each  
814 craniofacial tissue sample. These chromatin states were then used for downstream functional  
815 analyses to determine relevance for craniofacial biology and disease.



816 **Figure 2. Histone Modification Profiles in Human Craniofacial Development.** **a.** Heatmap  
817 and hierarchical clustering of pairwise Pearson correlations for non-overlapping 10kb bins  
818 across the human genome for 114 individual histone modification profiles from human  
819 craniofacial tissues. Relatedness of epigenomic profiles by sample indicated by dendrogram  
820 along vertical axes of heatmap. Darker orange indicates positive correlation between datasets.  
821 **b.** Genomic feature annotations identified by peak calls from six histone modification profiles  
822 from the same tissue sample plotted as cumulative percentage of total peaks. Peak enrichments  
823 and genomic annotations were performed using HOMER<sup>83</sup>. **c.** Histone modification peaks  
824 identified in at least two separate tissue samples from the same developmental stage and  
825 annotated into three broad categories: promoter (2kb upstream of TSS), exons, and all other  
826 intronic or intergenic locations.

827 **Figure 3. Imputation of Craniofacial Epigenomic Signals and Chromatin State**  
828 **Segmentation.** **a.** Principal component analysis projection of first two component dimensions  
829 for 252 imputed and 114 primary epigenomic profiles for human craniofacial samples across  
830 non-overlapping 10kb bins. Samples are color coded by epigenomic mark and shapes indicate  
831 primary versus imputed data types. Samples generally cluster into three broad categories of  
832 activity: repression, regulatory element activation, and transcription regulation. **b.** Numbers of  
833 individual chromatin state segments identified by each of the color coded 25 states of chromatin  
834 activity based on imputed epigenomic signals for each of the 21 tissue samples profiled. **c.**  
835 Comparison of cumulative percentage of each chromatin state between craniofacial samples  
836 profiled here and 127 segmentations generated by Roadmap Epigenome<sup>22</sup>. **d.** Mean numbers of  
837 segments annotated in each of the 25 states across 21 craniofacial samples (orange) and 127  
838 Roadmap Epigenomes (gray). Error bars represent standard deviation. Overall chromatin state  
839 segmentation in craniofacial samples identifies similar numbers and percentages of each of 25  
840 states published by Roadmap Epigenome<sup>22</sup>.

841 **Figure 4. Chromatin State Segmentations Identify Novel Craniofacial Regulatory**  
842 **Sequences.** **a.** Percentage of *in vivo* validated embryonic enhancers with (orange) or without  
843 (grey) craniofacial activity from the Vista Enhancer Browser<sup>50</sup> identified by craniofacial  
844 chromatin segments annotated as enhancer states. Significance determined by Fisher's exact  
845 test. **b.** Selected validated enhancers with craniofacial activity identified by this study from the  
846 the Vista Enhancer Browser. **c.** Principal component analysis projection of second and third  
847 component dimensions for 146 H3K27ac profiles at 425380 regions annotated as enhancer  
848 segments in any of the samples profiled here or Roadmap Epigenome. Samples are color  
849 coded by group annotations assigned by Roadmap Epigenome or craniofacial samples from this

850 study. Percent of variance across samples explained by each component are indicated along  
851 each axis. **d.** Transcription factor position weight matrices identified by HOMER<sup>83</sup> as enriched in  
852 novel craniofacial enhancer segments. **e.** Significant enrichments of human disease phenotypes  
853 for genes assigned to novel craniofacial enhancer segments as reported by GREAT<sup>58</sup>. **f.**  
854 Enrichment of anatomical expression of transcription factors identified as potentially regulated  
855 by novel craniofacial enhancer segments as reported by GeneORGANizer<sup>88</sup>. Heat indicates fold  
856 enrichment of expression in individual anatomical region or organ. Craniofacial and  
857 appendicular skeleton showed most significant enrichments.

858 **Figure 5. Self-Organizing Map for Biological Mining of Craniofacial Enhancers** **a.** Flattened  
859 projections of toroid self-organizing map generated from H3K27ac signals from 146 samples  
860 across 425380 enhancer segments consisting of 2500 individual hexagonal units for four  
861 craniofacial tissues, four embryonic stem-cell and related cell types, and four adult brain tissues.  
862 Higher scoring units in a given tissue are indicated by red, lower scoring units by blue. Two  
863 selected metaclusters scoring highly for craniofacial or brain tissues are indicated by black  
864 outlines. **b.** Fold enrichment (dots) and significance (bars) of top human disease phenotypes  
865 associated with genes assigned to enhancer segments by GREAT<sup>58</sup> in each metacluster. A  
866 metacluster highly scoring reproducibly in craniofacial tissues is enriched for enhancers  
867 putatively assigned to genes associated with a wide variety of craniofacial abnormalities. A  
868 metacluster highly scoring across brain tissues is enriched for diverse brain and neurological  
869 diseases. While PCA and hierarchical clustering identified craniofacial tissues were more similar  
870 to ESC and ESC-derived cell types, the self-organizing map identifies distinct clusters of  
871 enhancers specific to craniofacial tissues.

872 **Figure 6. Identification of Potential Craniofacial Locus Control Region for *HOXA* Gene**  
873 **Cluster.** **a.** Large 450kb window lacking any annotated protein-coding genes with extensive  
874 enrichment of activated enhancer (yellow and orange) and transcriptionally active (green)  
875 segment annotations in human craniofacial tissue. See Figure 3b for full annotations. Multiple  
876 validated craniofacial enhancers have been identified in this window by the Vista Enhancer  
877 Browser. In this study we tested and validated the craniofacial enhancer activity of HACNS50,  
878 located within the bivalent chromatin state at the right of the displayed window. Segments  
879 interrogated by 4C-Seq indicated by vertical colored viewpoint bars **b.** Approximately 3Mb  
880 window of the human genome encompassing the window identified in panel **a** (black box) and  
881 containing the *HOXA* gene cluster. **c.** Spidergrams indicating significant interactions between  
882 color-coded viewpoints and distal sites identified by 4C-Seq in mouse E11.5 craniofacial tissue.  
883 Viewpoints 1 and 2 do not cross putative TAD boundary near HACNS50 enhancer. Viewpoints 3



884 and 4 make significant contacts within identified window and with the *HOXA* gene cluster.  
885 Reciprocal experiments from the *HOXA* gene cluster (viewpoint 6) indicated significant long-  
886 range interactions with both boundaries of the window in panel **a**.

## 887 **Supplemental Figure and Table Legends**

888 **Supplemental figures and tables can be obtained from FigShare:**

889 [10.6084/m9.figshare.4954202](https://doi.org/10.6084/m9.figshare.4954202)

890

891 **Supplementary Figure 1. Detailed Histone Modification Profiles in Human Craniofacial**  
892 **Development. a.** Heatmap and hierarchical clustering of pairwise Pearson correlations for 114  
893 individual histone modification profiles from human craniofacial tissues. Darker orange indicates  
894 positive correlation between datasets. Enlarged from **Fig. 2a** to include sample details, showing  
895 samples cluster closely by histone mark. **b.** Correlation of only H3K27ac data contained in the  
896 area boxed in black in part **a**. Heatmap and hierarchical clustering show that the samples cluster  
897 well into groups by early or late stage of development.

898 **Supplementary Figure 2. Complete Histone Modification Profiles in Human Craniofacial**  
899 **Development** Genomic feature annotations identified by peak calls from six histone  
900 modification profiles from all craniofacial samples, across all Carnegie stages, plotted as  
901 cumulative percentage of total peaks. Peak enrichments and genomic annotations were  
902 performed using HOMER<sup>83</sup>.

903 **Supplementary Figure 3. Imputed Histone Modification Profiles in Human Craniofacial**  
904 **Development. a.** Heatmap and hierarchical clustering of pairwise Pearson correlations for  
905 imputed histone modification profiles from human craniofacial tissues. Darker orange indicates  
906 positive correlation between datasets. **b.** Heatmap and hierarchical clustering of pairwise  
907 Pearson correlations for imputed and primary histone modification profiles from human  
908 craniofacial tissues. Darker orange indicates positive correlation between datasets.

909 **Supplementary Figure 4. Imputation of Craniofacial Epigenomic Signals and Chromatin**  
910 **State Segmentation in the 15-State (Primary) and 18-State (Auxiliary) ChromHMM models.**  
911 **a.** Numbers of individual chromatin state segments identified by each of the color- coded 15  
912 states of chromatin activity based on imputed epigenomic signals for each of the 21 tissue  
913 samples profiled. **b.** Comparison of cumulative percentage of each chromatin state between  
914 craniofacial samples profiled here and 127 segmentations generated by Roadmap  
915 Epigenome<sup>22</sup>. **c.** Mean numbers of segments annotated in each of the 15 states across 21  
916 craniofacial samples (orange) and 127 Roadmap Epigenomes (gray). **d.** Mean percentages of

917 segments annotated in each of the 15 states across 21 craniofacial samples (orange) and 127  
918 Roadmap Epigenomes (gray). **e.** Same as in panel **a**, but for 18-State Model. **f.** Same as in  
919 panel **b**, but for 18-State Model. **g.** Same as in panel **c**, but for 18-State Model. **h.** Same as in  
920 panel **d**, but for 18-State Model. Error bars represent standard deviation. Overall chromatin  
921 state segmentation in craniofacial samples identifies similar numbers and percentages of each  
922 of the states published by Roadmap Epigenome<sup>22</sup>.

923 **Supplementary Figure 5. All Enhancers Tested for Craniofacial Activity** All enhancers  
924 identified and tested by this study from the Vista Enhancer Browser. Enhancers with *hs* prefix  
925 indicated the human genomic sequence was tested while those with the *mm* prefix indicate that  
926 the orthologous sequence from mouse identified by this study was tested.

927 **Supplementary Figure 6. H3K27ac Signal at Enhancer Segments Allows for Correlation**  
928 **by Tissue Type.** **a.** Heatmap and hierarchical clustering of pairwise comparisons of H3K27ac  
929 signals at all enhancer segments in our craniofacial data and the 127 samples from Roadmap  
930 Epigenome. Red coloring indicates positive correlation between datasets, blue indicates less  
931 correlation. **b.** Principal component analyses of the first four component dimensions of H3K27ac  
932 signals in a serial progressive fashion (i.e PC1 vs PC2, PC2 vs PC3, etc.). Samples are color  
933 coded by tissue type.

934 **Supplementary Figure 7. Identification of Craniofacial-specific Enhancers Flanking *MSX2*.**  
935 Enhancer states annotated by the 25-state model that are found only in craniofacial tissue but  
936 not the 127 samples from Roadmap Epigenome are located upstream and downstream of  
937 *MSX2*, a gene implicated in multiple craniofacial abnormalities. The enhancer states fall within a  
938 region of conservation and are supported at top by ChIP signals from a single human  
939 craniofacial tissue sample.

940 **Supplementary Figure 8. Integration of CL/P GWAS Data Places SNPs within**  
941 **Craniofacial-specific Enhancers.** **a.** Enrichment analysis identified orofacial cleft GWAS tag  
942 SNPs preferentially among craniofacial tissue. **b.** Enhancer state analysis permits placement of  
943 a potentially causative allele for non-syndromic CL/P (rs642961) within a predicted early  
944 development enhancer state. This enhancer state is located between *IRF6* and *DIEXF* and may  
945 influence expression of *IRF6*. **c.** The orofacial cleft-associated tag SNP rs745080 resides within  
946 the intron of *TXNDC16*, which is marked by a craniofacial-specific enhancer state.

947 **Supplementary Figure 9. Clustering Identifies Similar Functional Enrichment to Self-**  
948 **Organizing Maps** **a.** K-means clustering performed directly on the matrix of H3K27ac signals,  
949 using the same number of clusters utilized for the self-organizing map (199), showed distinct  
950 H3K27ac activation in craniofacial tissues (enlarged section on the right). **b.** Analysis of the

951 sequence content of enhancer clusters most specific for craniofacial activity identified  
952 enrichments of motifs for the *HOX*, *LHX*, *MSX* and *DLX* families of transcription factors.

953 **Supplementary Figure 10. Incorporation of Topologically Associated Domain Structure**  
954 **and Clinical Case Suggests Interaction Between Distal Enhancer and HoxA Region.** Hi-C  
955 data from HUVEC visualized using the Hi-C browser (<http://promoter.bx.psu.edu/hi-c/view.php>)  
956 indicates an interaction between the *HOXA* cluster and an intergenic region approximately 1Mb  
957 away from the anterior side. A deletion covering this region and notably leaving the *HOXA*  
958 cluster intact has been described in a patient with facial dysgenesis<sup>78</sup> (indicated in purple).  
959 The intergenic region contains a 450kb enhancer state, as represented by the 15-, 18-  
960 and 25-state ChromHMM model of craniofacial data, with regions of high conservation.  
961 Four viewpoints used in 4C-seq are indicated, flanking the region of interest. Seven  
962 enhancers with craniofacial activity are located within this region, indicated by black  
963 bars and representative images. Enhancers mm403-407 and hs1600 were tested by the  
964 Vista Enhancer Browser<sup>50</sup>, HACNS50 was tested independently.

965 **Supplementary Figure 11. Distal Regulatory Region Shares Chromatin State in Mouse.**  
966 ChIP-Seq data from Mouse Encode for embryonic day 11.5 facial prominence display a  
967 conserved set of chromatin marks in the region distal to the *HOXA* cluster suggesting a  
968 conserved function in mouse craniofacial development.

969 **Supplementary Figure 12. Syntenic Block Near *HOXA* Cluster.** A comparison of a 10 Mb  
970 window around the *HOXA* cluster on human Chromosome 7 shows synteny with mouse  
971 Chromosome 6. In addition to the preservation of gene order, there is also preservation of a  
972 large non-coding region distal to the anterior side of the *HOXA* cluster in mouse.

973 **Supplementary Figure 13. Targeted Sequencing of 13 Loci Identified by GWAS Studies to**  
974 **be Important In Craniofacial Development Misses a Regulatory Region in *BMP4*.** The  
975 study by Leslie et al.<sup>77</sup> performed targeted sequencing of a region of ~60 kb surrounding the  
976 *BMP4* gene (black bar at top of figure). This region excluded a region immediately adjacent  
977 (outlined by green box) identified as an enhancer by the 25-State, Imputed ChromHMM model  
978 in all 21 craniofacial tissues analyzed.

979 **Supplementary Table 1.** Table showing, for each sample, for each mark, the number of total  
980 sequencing reads, the number of uniquely mapped reads, the number of multi-mapped reads,  
981 percentage of mapped reads, and percentage of uniquely mapped reads. Total numbers, in  
982 billions, and means, in millions, are displayed in bottom two rows of the table.

983 **Supplementary Table 2.** Table showing all enhancer segments in craniofacial epigenomic atlas  
984 that were never annotated as any type of enhancer state in all of Roadmap Epigenome.

985 **Supplementary Table 3.** Motifs identified for enrichment of transcription factor binding sites for  
986 novel craniofacial-specific enhancers found in this study. Consensus motif sequence, p-values,  
987 q-values, number of target sequences with the motif, percent of target sequences with the motif,  
988 number of background sequences with the motif, and percent of all background sequences with  
989 the motif are all indicated.

990 **Supplementary Table 4.** Functional categories with significant enrichment based on  
991 assignment of craniofacial-specific enhancers to the nearest gene, using Genomic Regions  
992 Enrichment of Annotations Tool (GREAT)<sup>58</sup>.

993 **Supplementary Table 5.** Regions containing tag SNPS identified in craniofacial tissue and  
994 associated with orofacial clefting, including gene assignments where applicable. Of note is a tag  
995 SNP in the noncoding region between *IRF6* and *DEXIF*, as well as an intronic sequence within  
996 the *TXNDC16* gene.

997 **Supplementary Table 6.** Functional categories with significant enrichment in the clusters of  
998 craniofacial-specific enhancers (annotated to the the nearest gene) obtained from K-means  
999 clustering on the matrix of H3K27ac signals using the same number of clusters utilized for the  
1000 self-organizing map, using Genomic Regions Enrichment of Annotations Tool (GREAT)<sup>58</sup>.

1001 **Supplementary Table 7.** Sheet1: 582 regions identified across the genome as containing  
1002 significant fractions of bases annotated as craniofacial enhancers; start position, end position,  
1003 and fraction of bases annotated as an enhancer state are shown. The second sheet shows  
1004 individual window analysis with fold enrichment versus randomized enhancer segmentations  
1005 and permutation p-values.

1006 **Supplementary Table 8.** Functional categories with significant enrichment based on  
1007 assignment of enriched enhancer windows to the nearest gene, using Genomic Regions  
1008 Enrichment of Annotations Tool (GREAT)<sup>58</sup>.

1009 **Supplementary Table 9.** Primers used for 4C-Seq analysis in mouse craniofacial tissue.

1010



**a**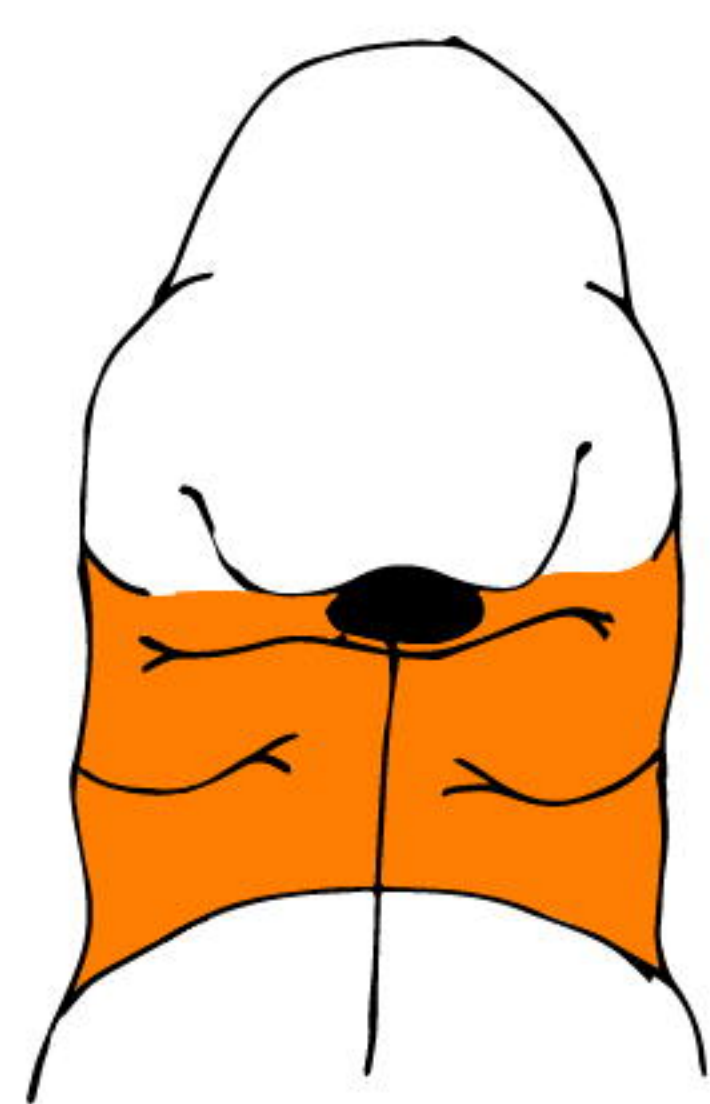

**CS13**  
4 PCW

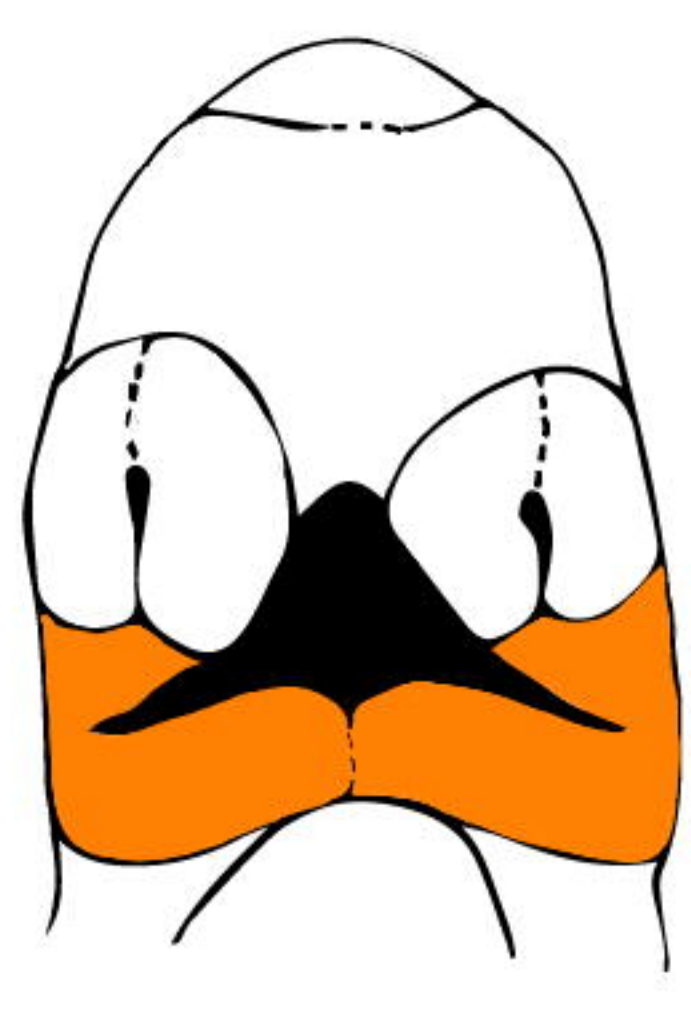

**CS14-15**  
4.5 - 5.5 PCW

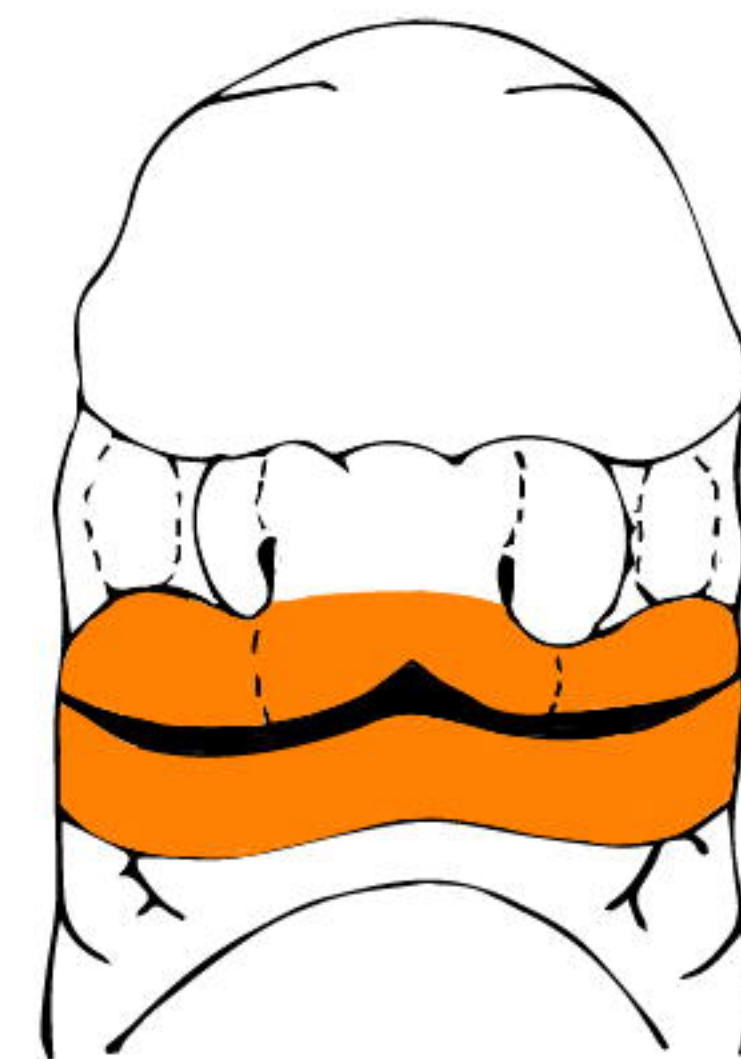

**CS17**  
6 PCW

**b**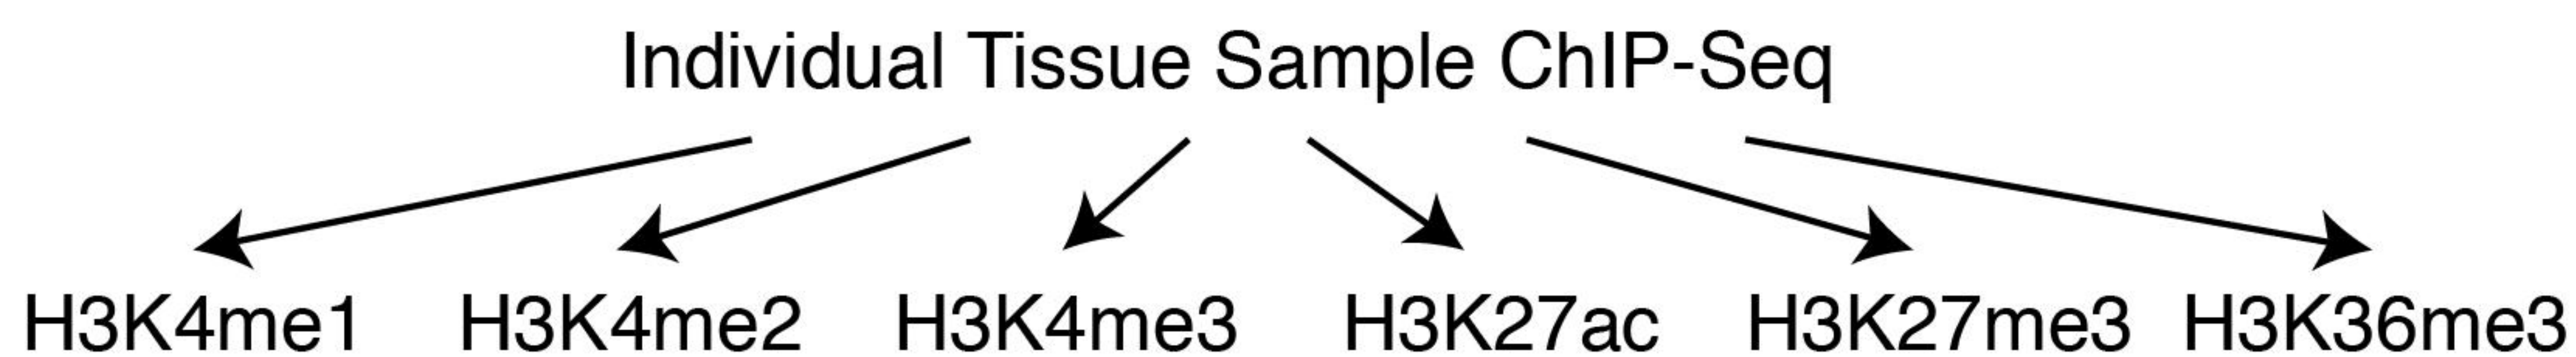

**Chromatin Signal  
Imputation**

**Chromatin State  
Segmentation**

**c**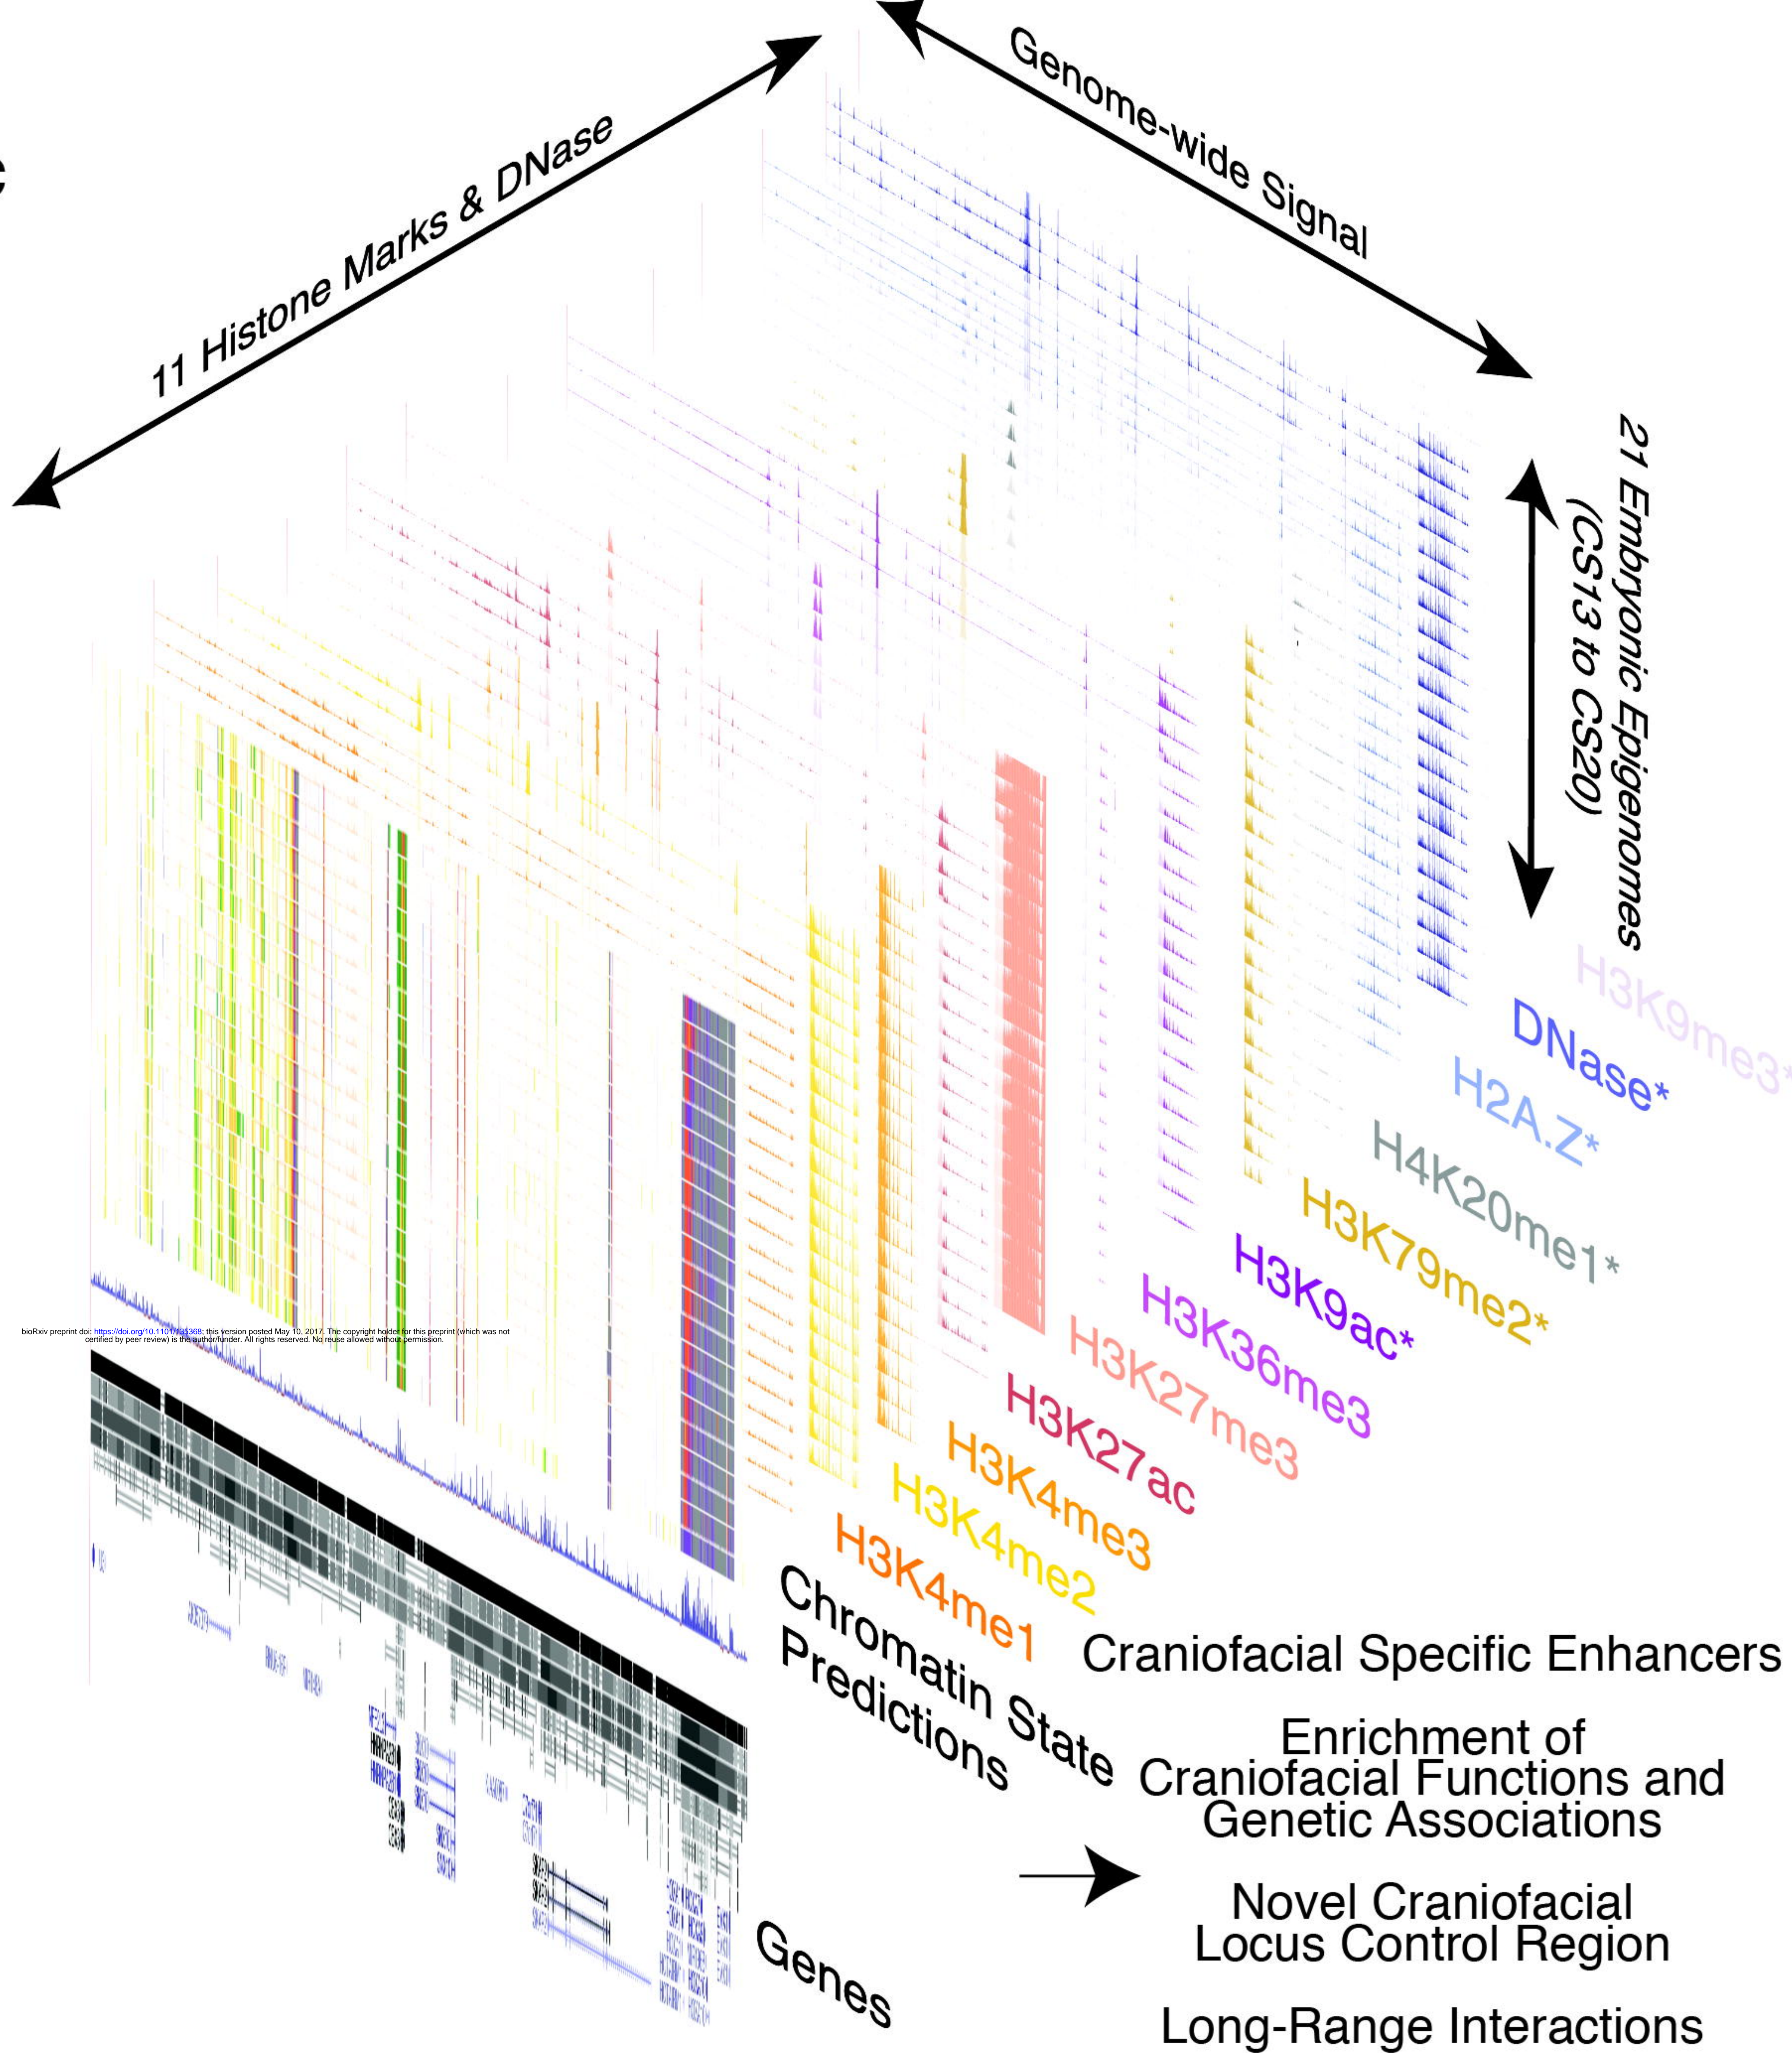



**a****Primary ChIP-Seq Data**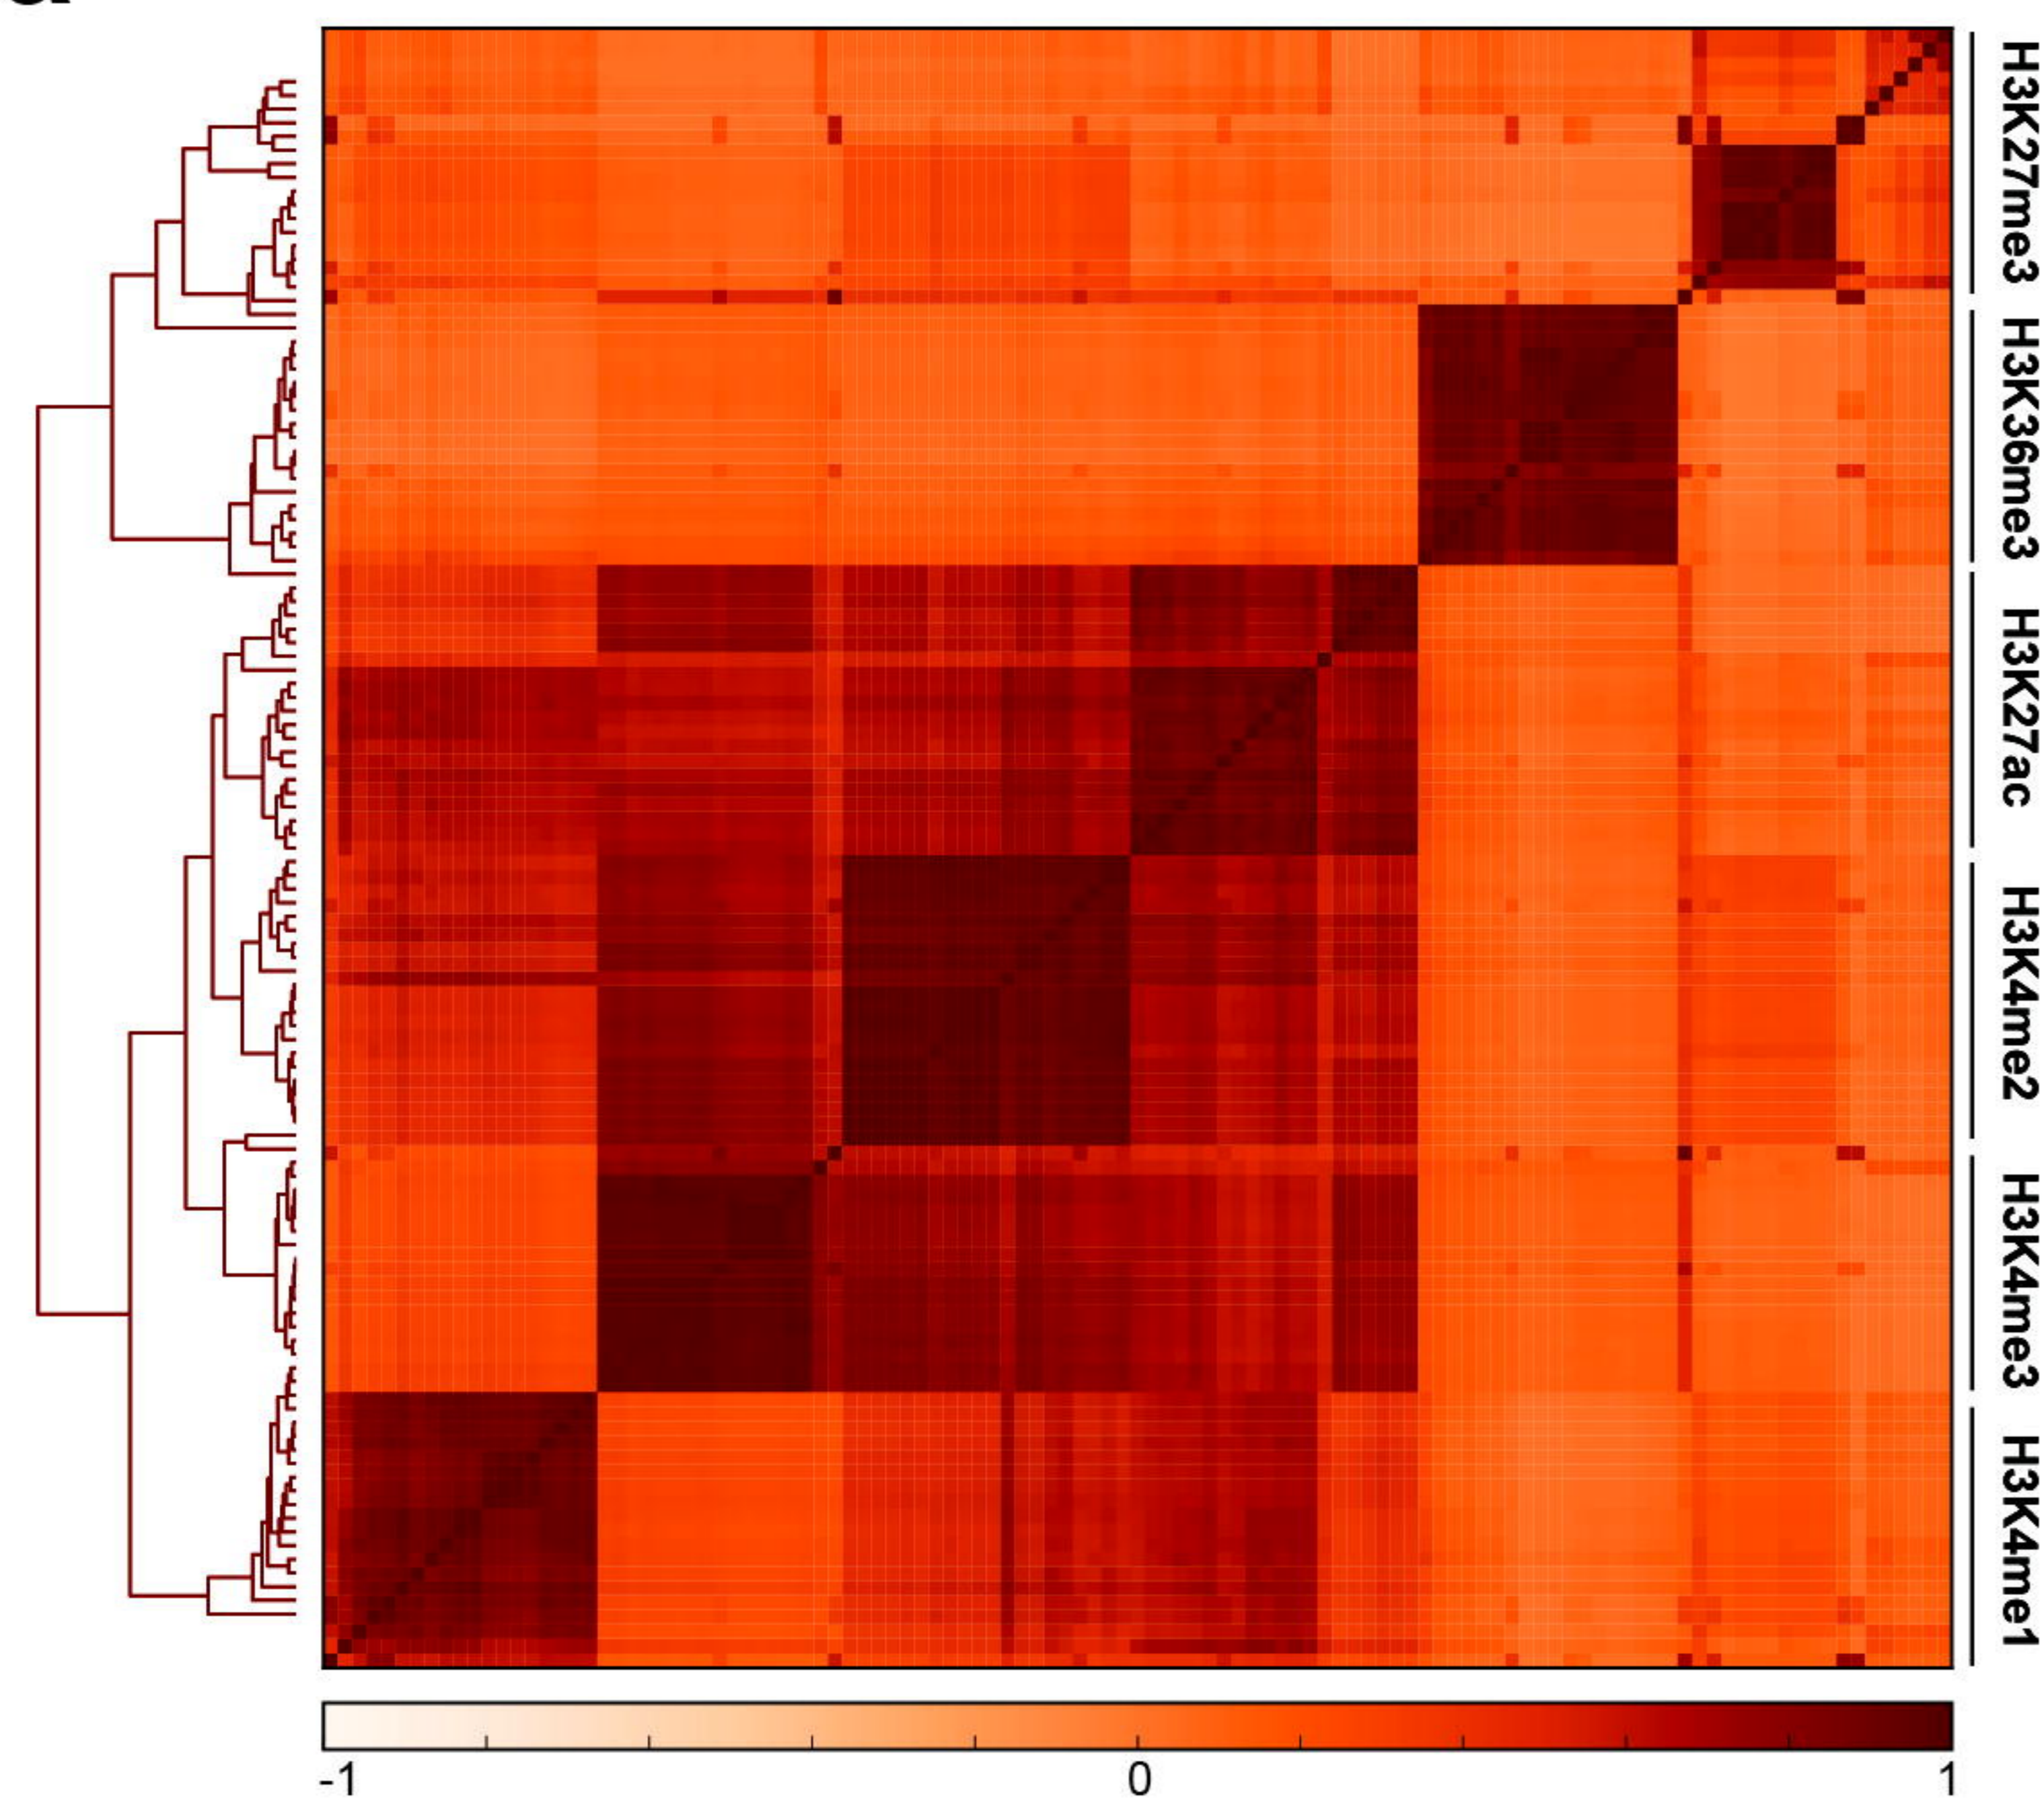**b****Genomic Features Identified by Each Mark**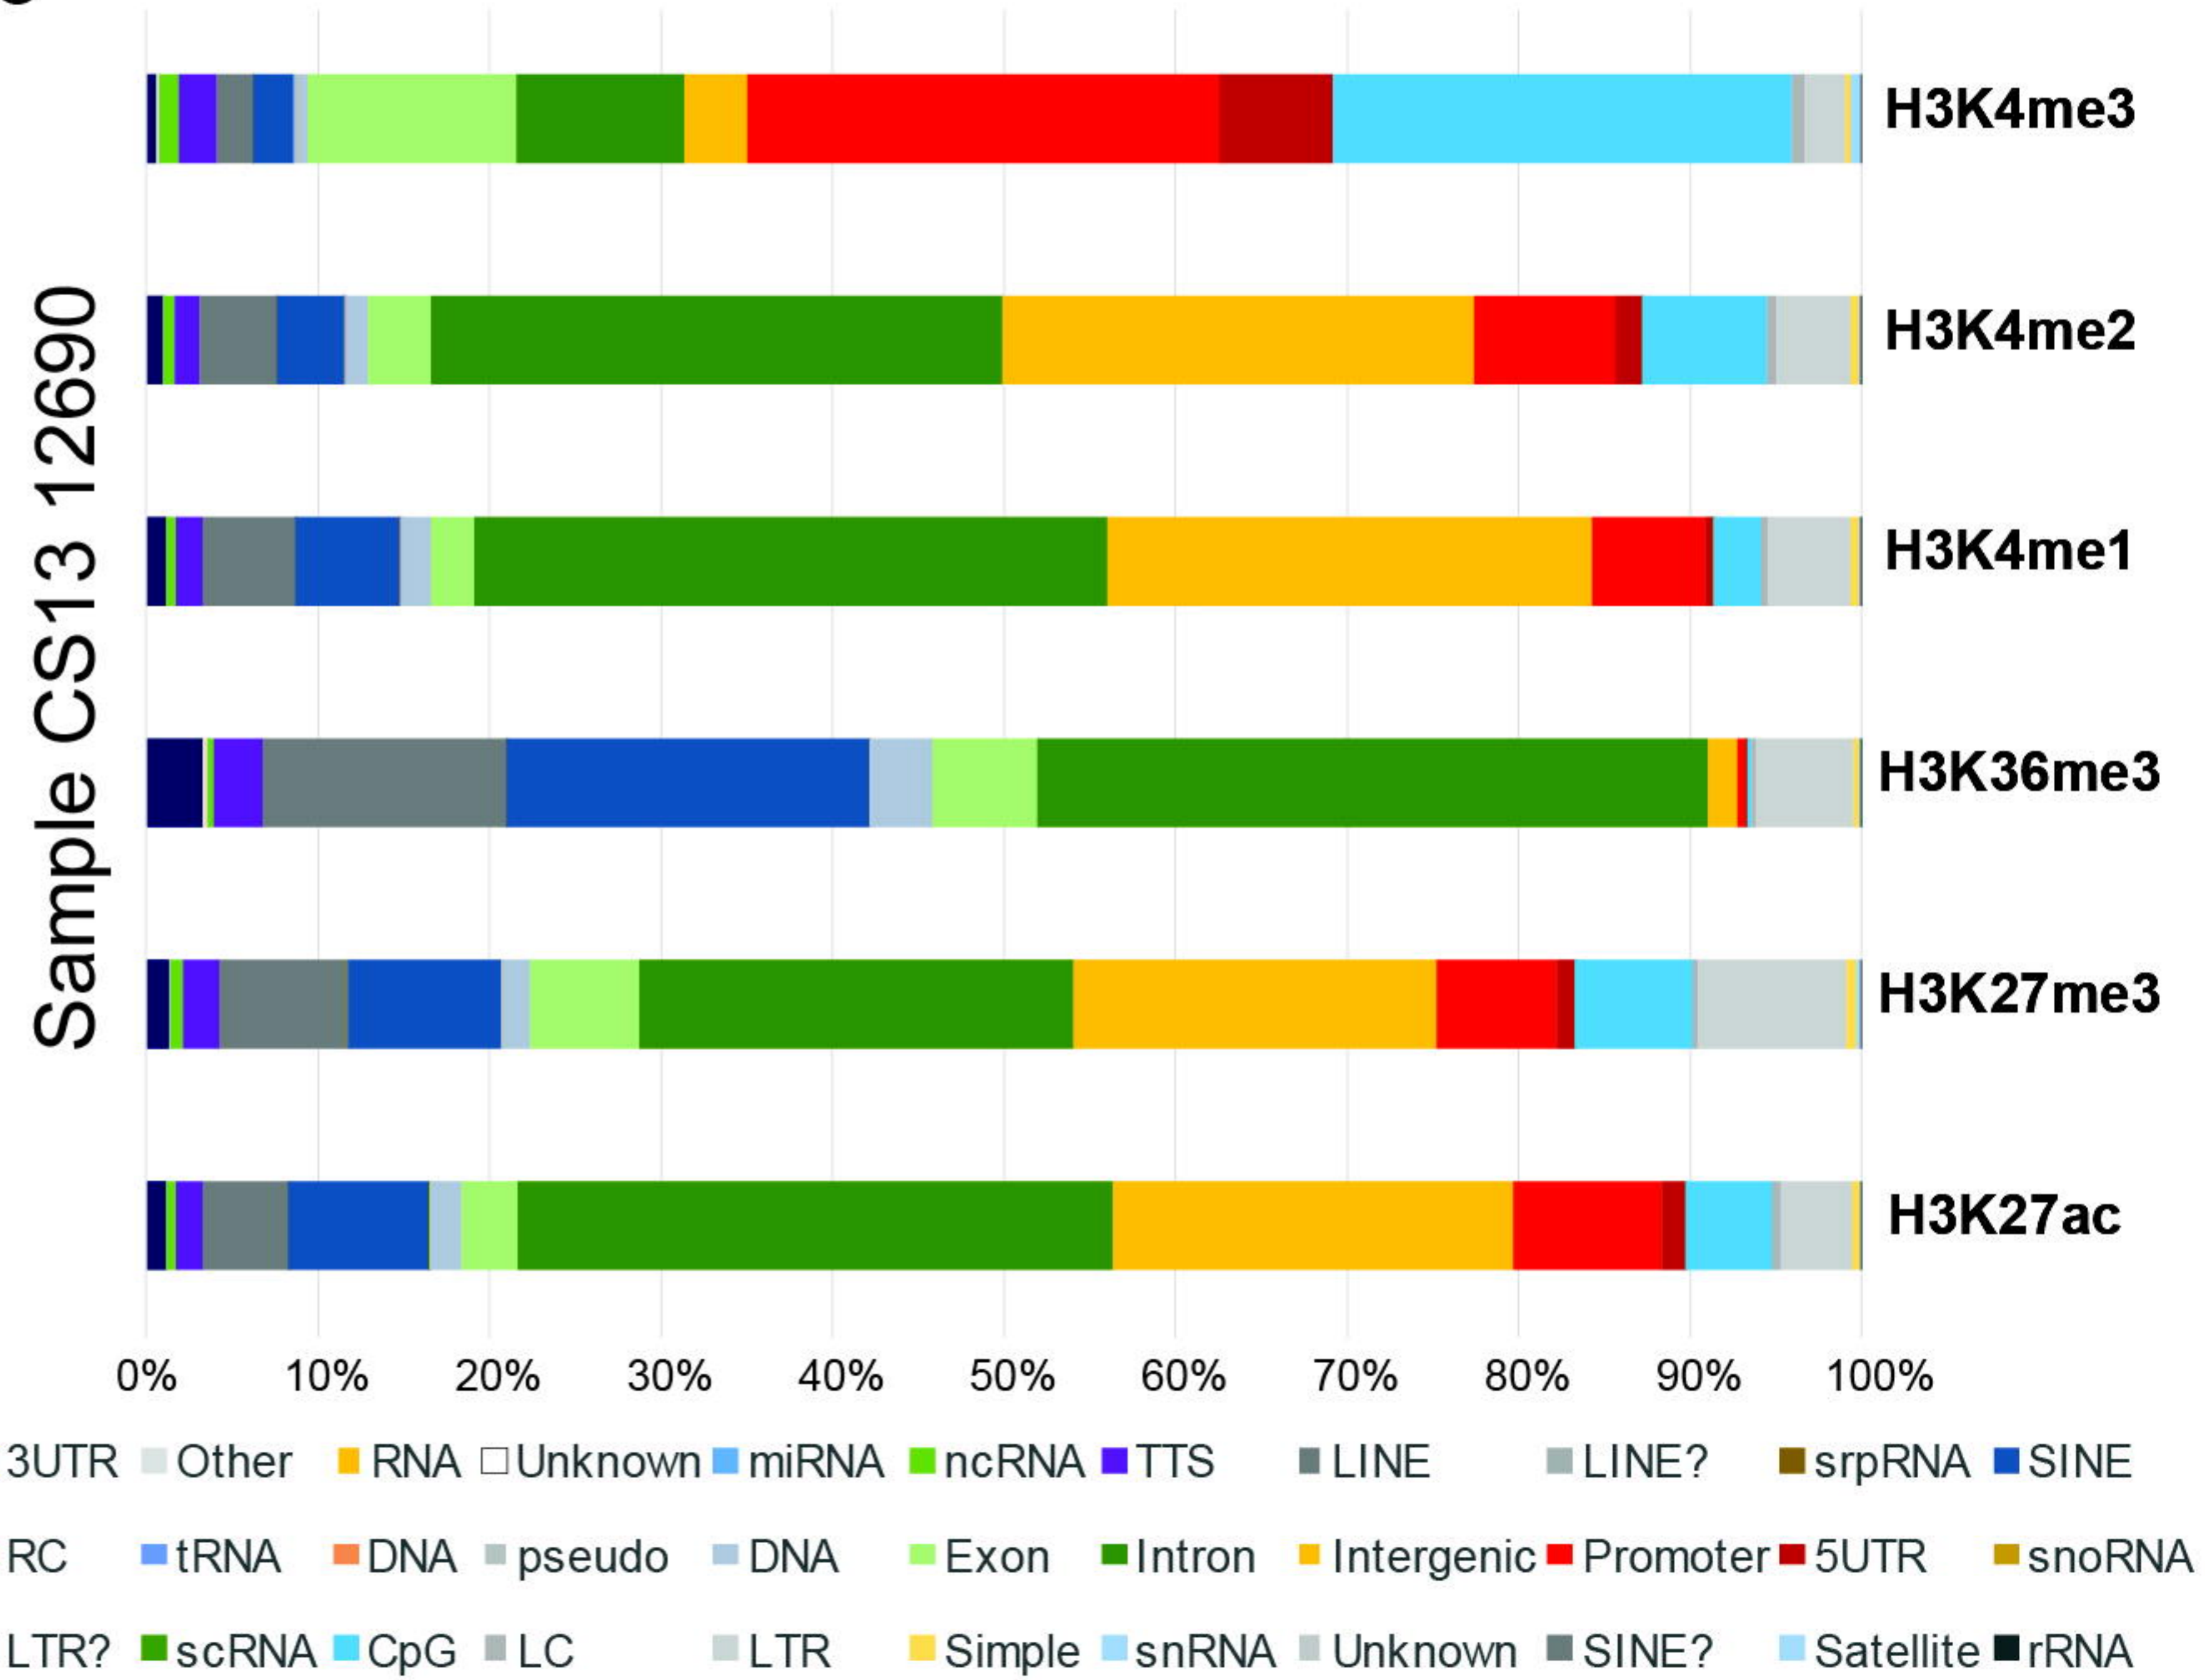**c****Reproducibly Enriched Regions**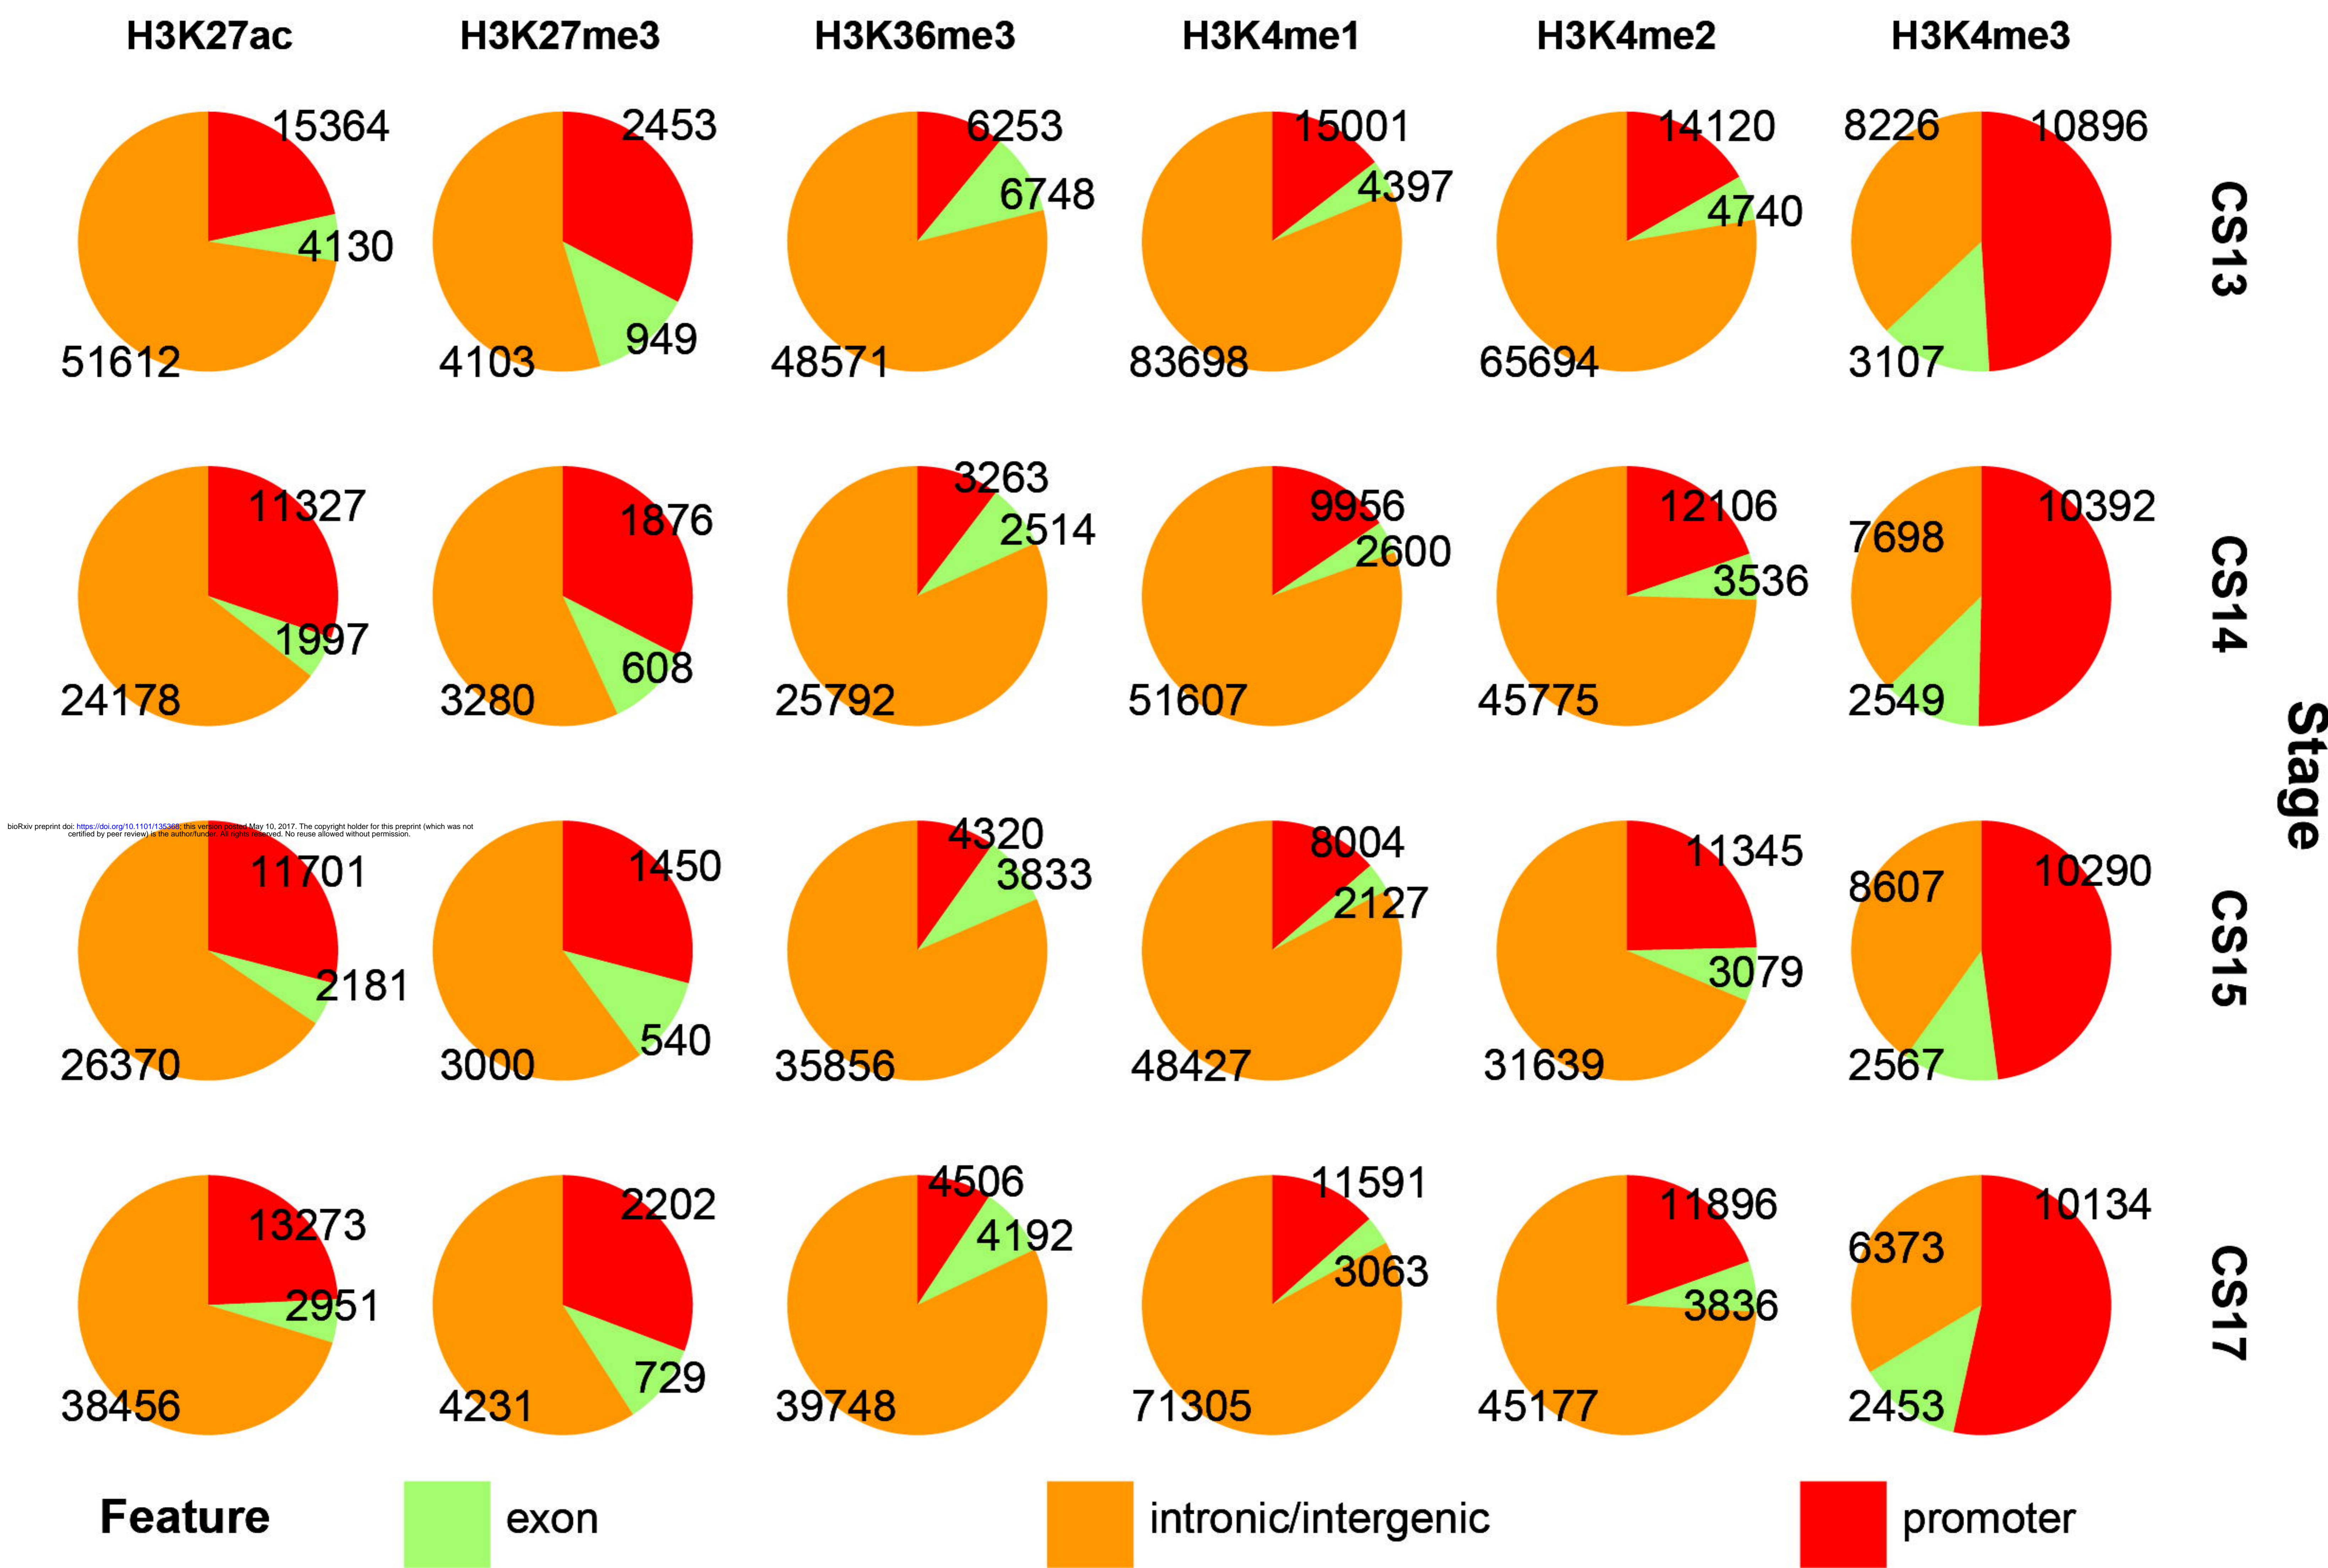



### a Imputed ChIP-Seq Signals for Craniofacial Tissues

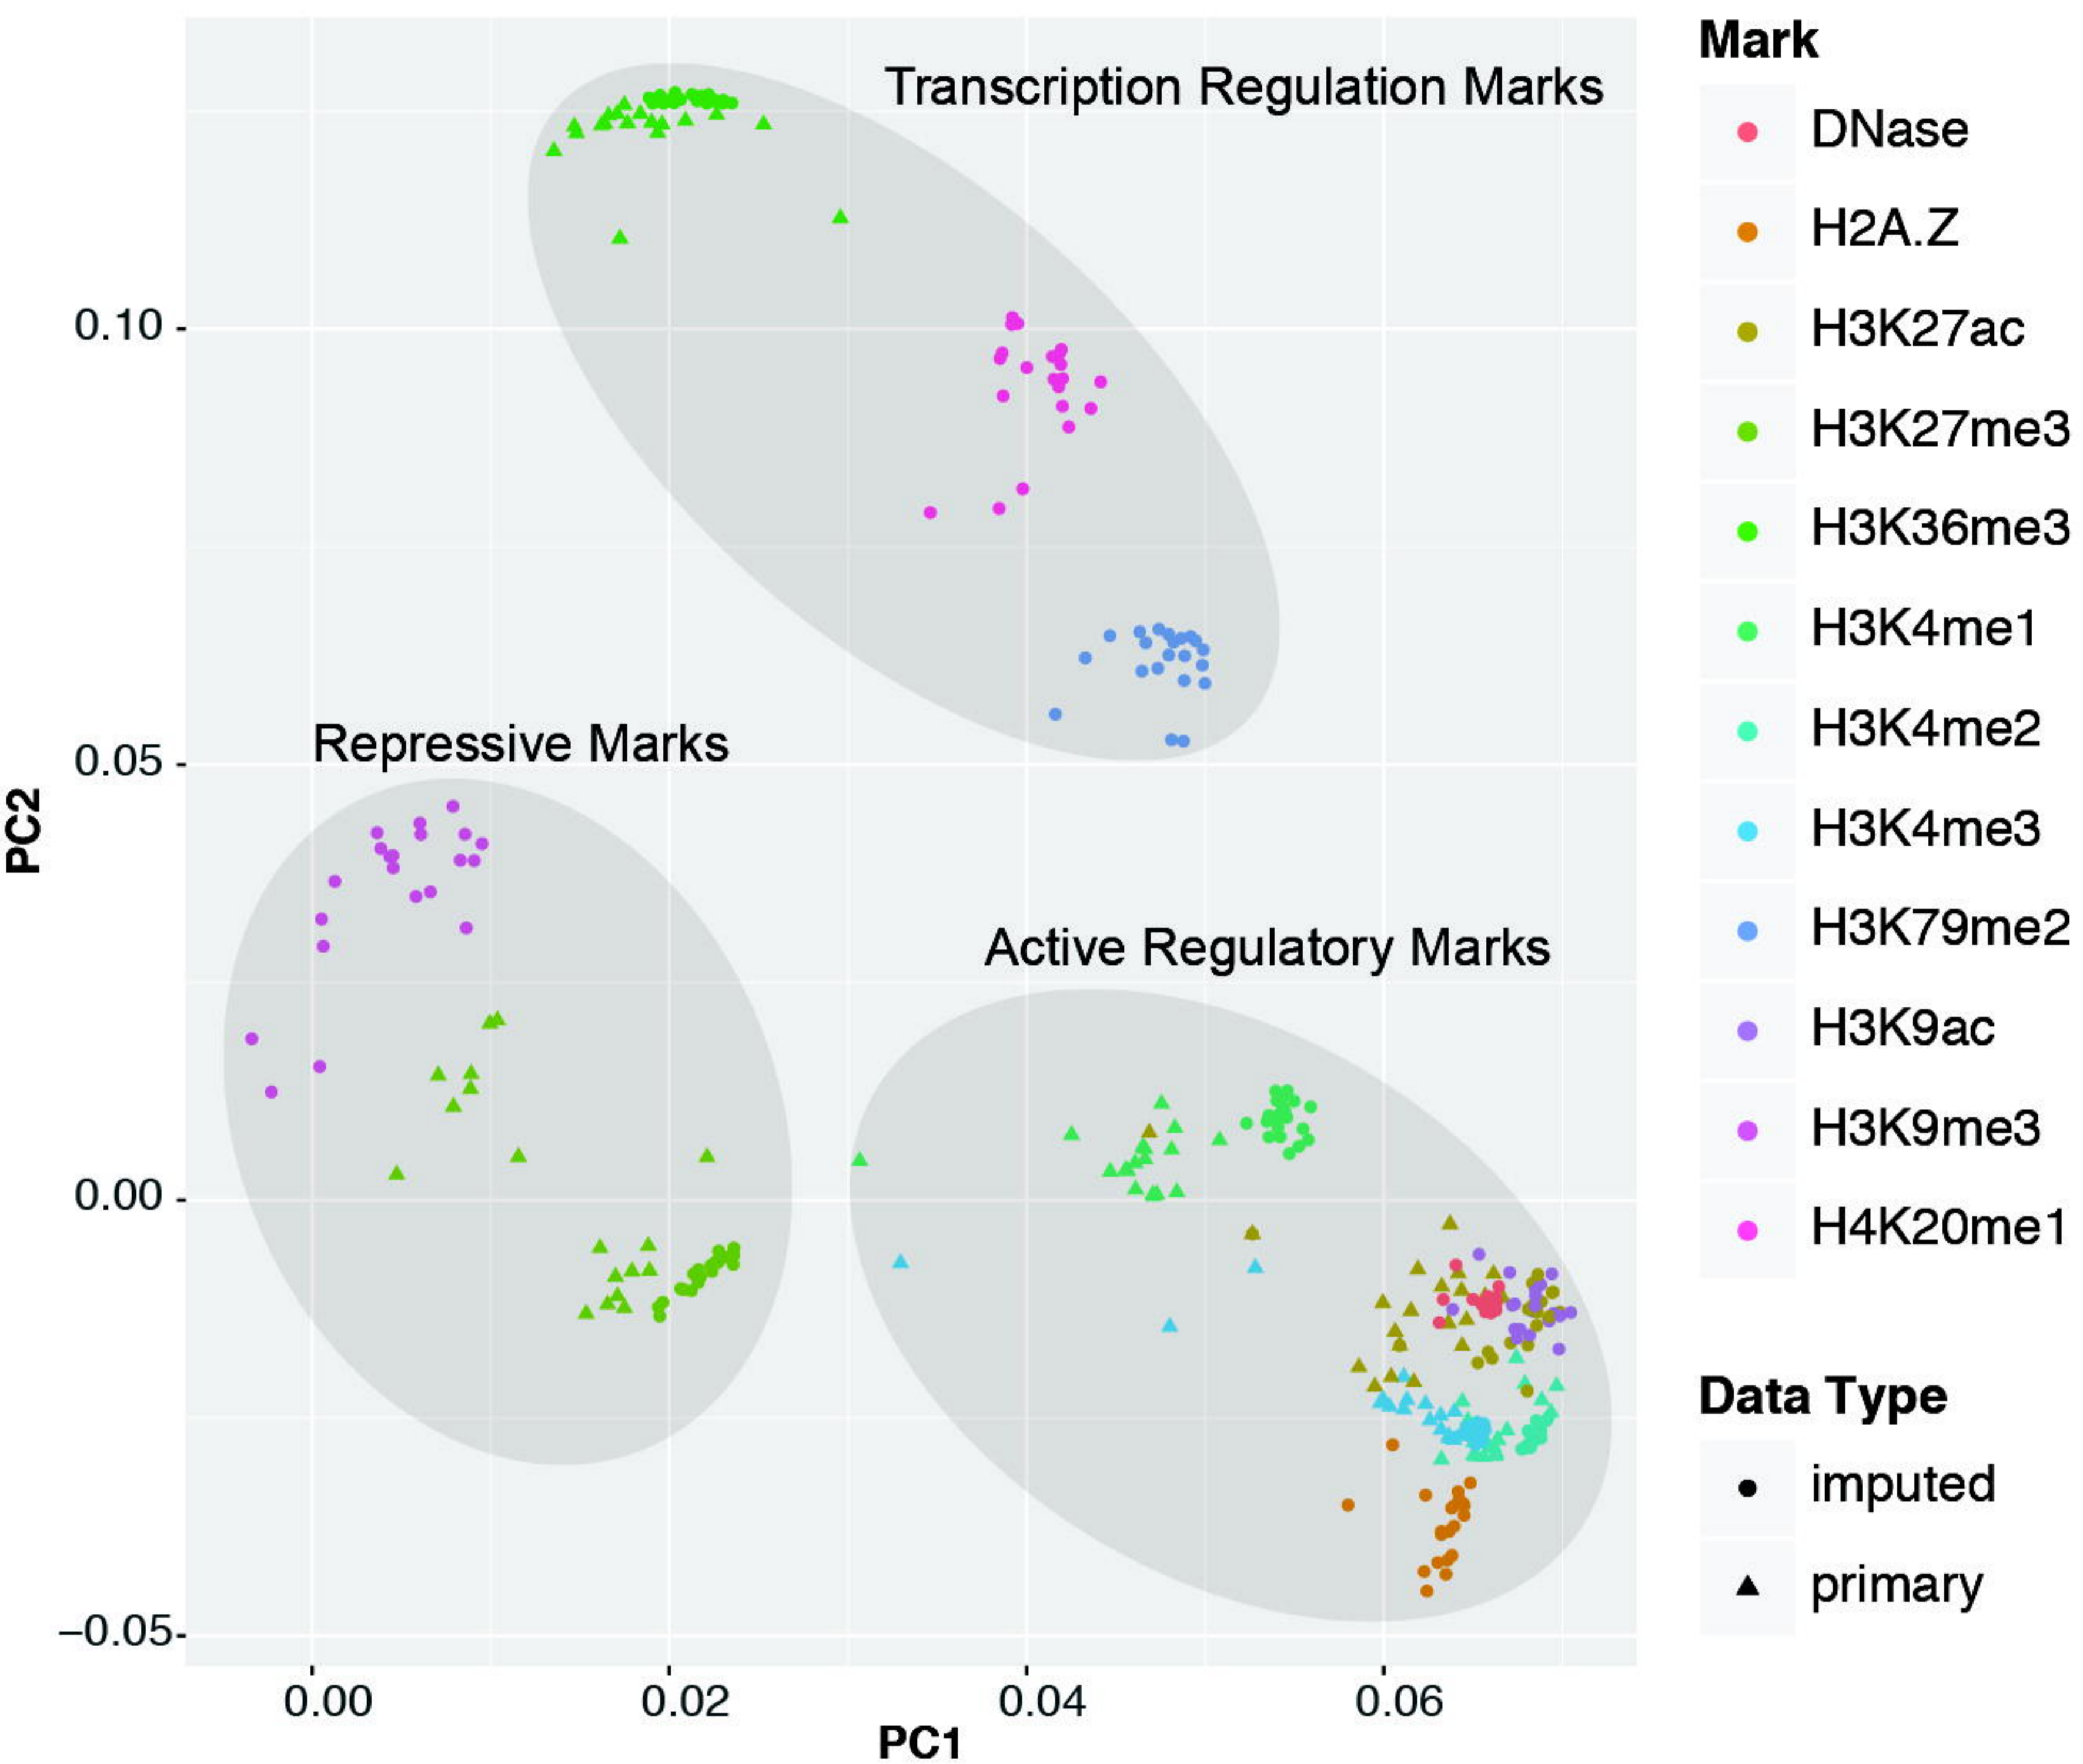

### b Cumulative Number of Chromatin States

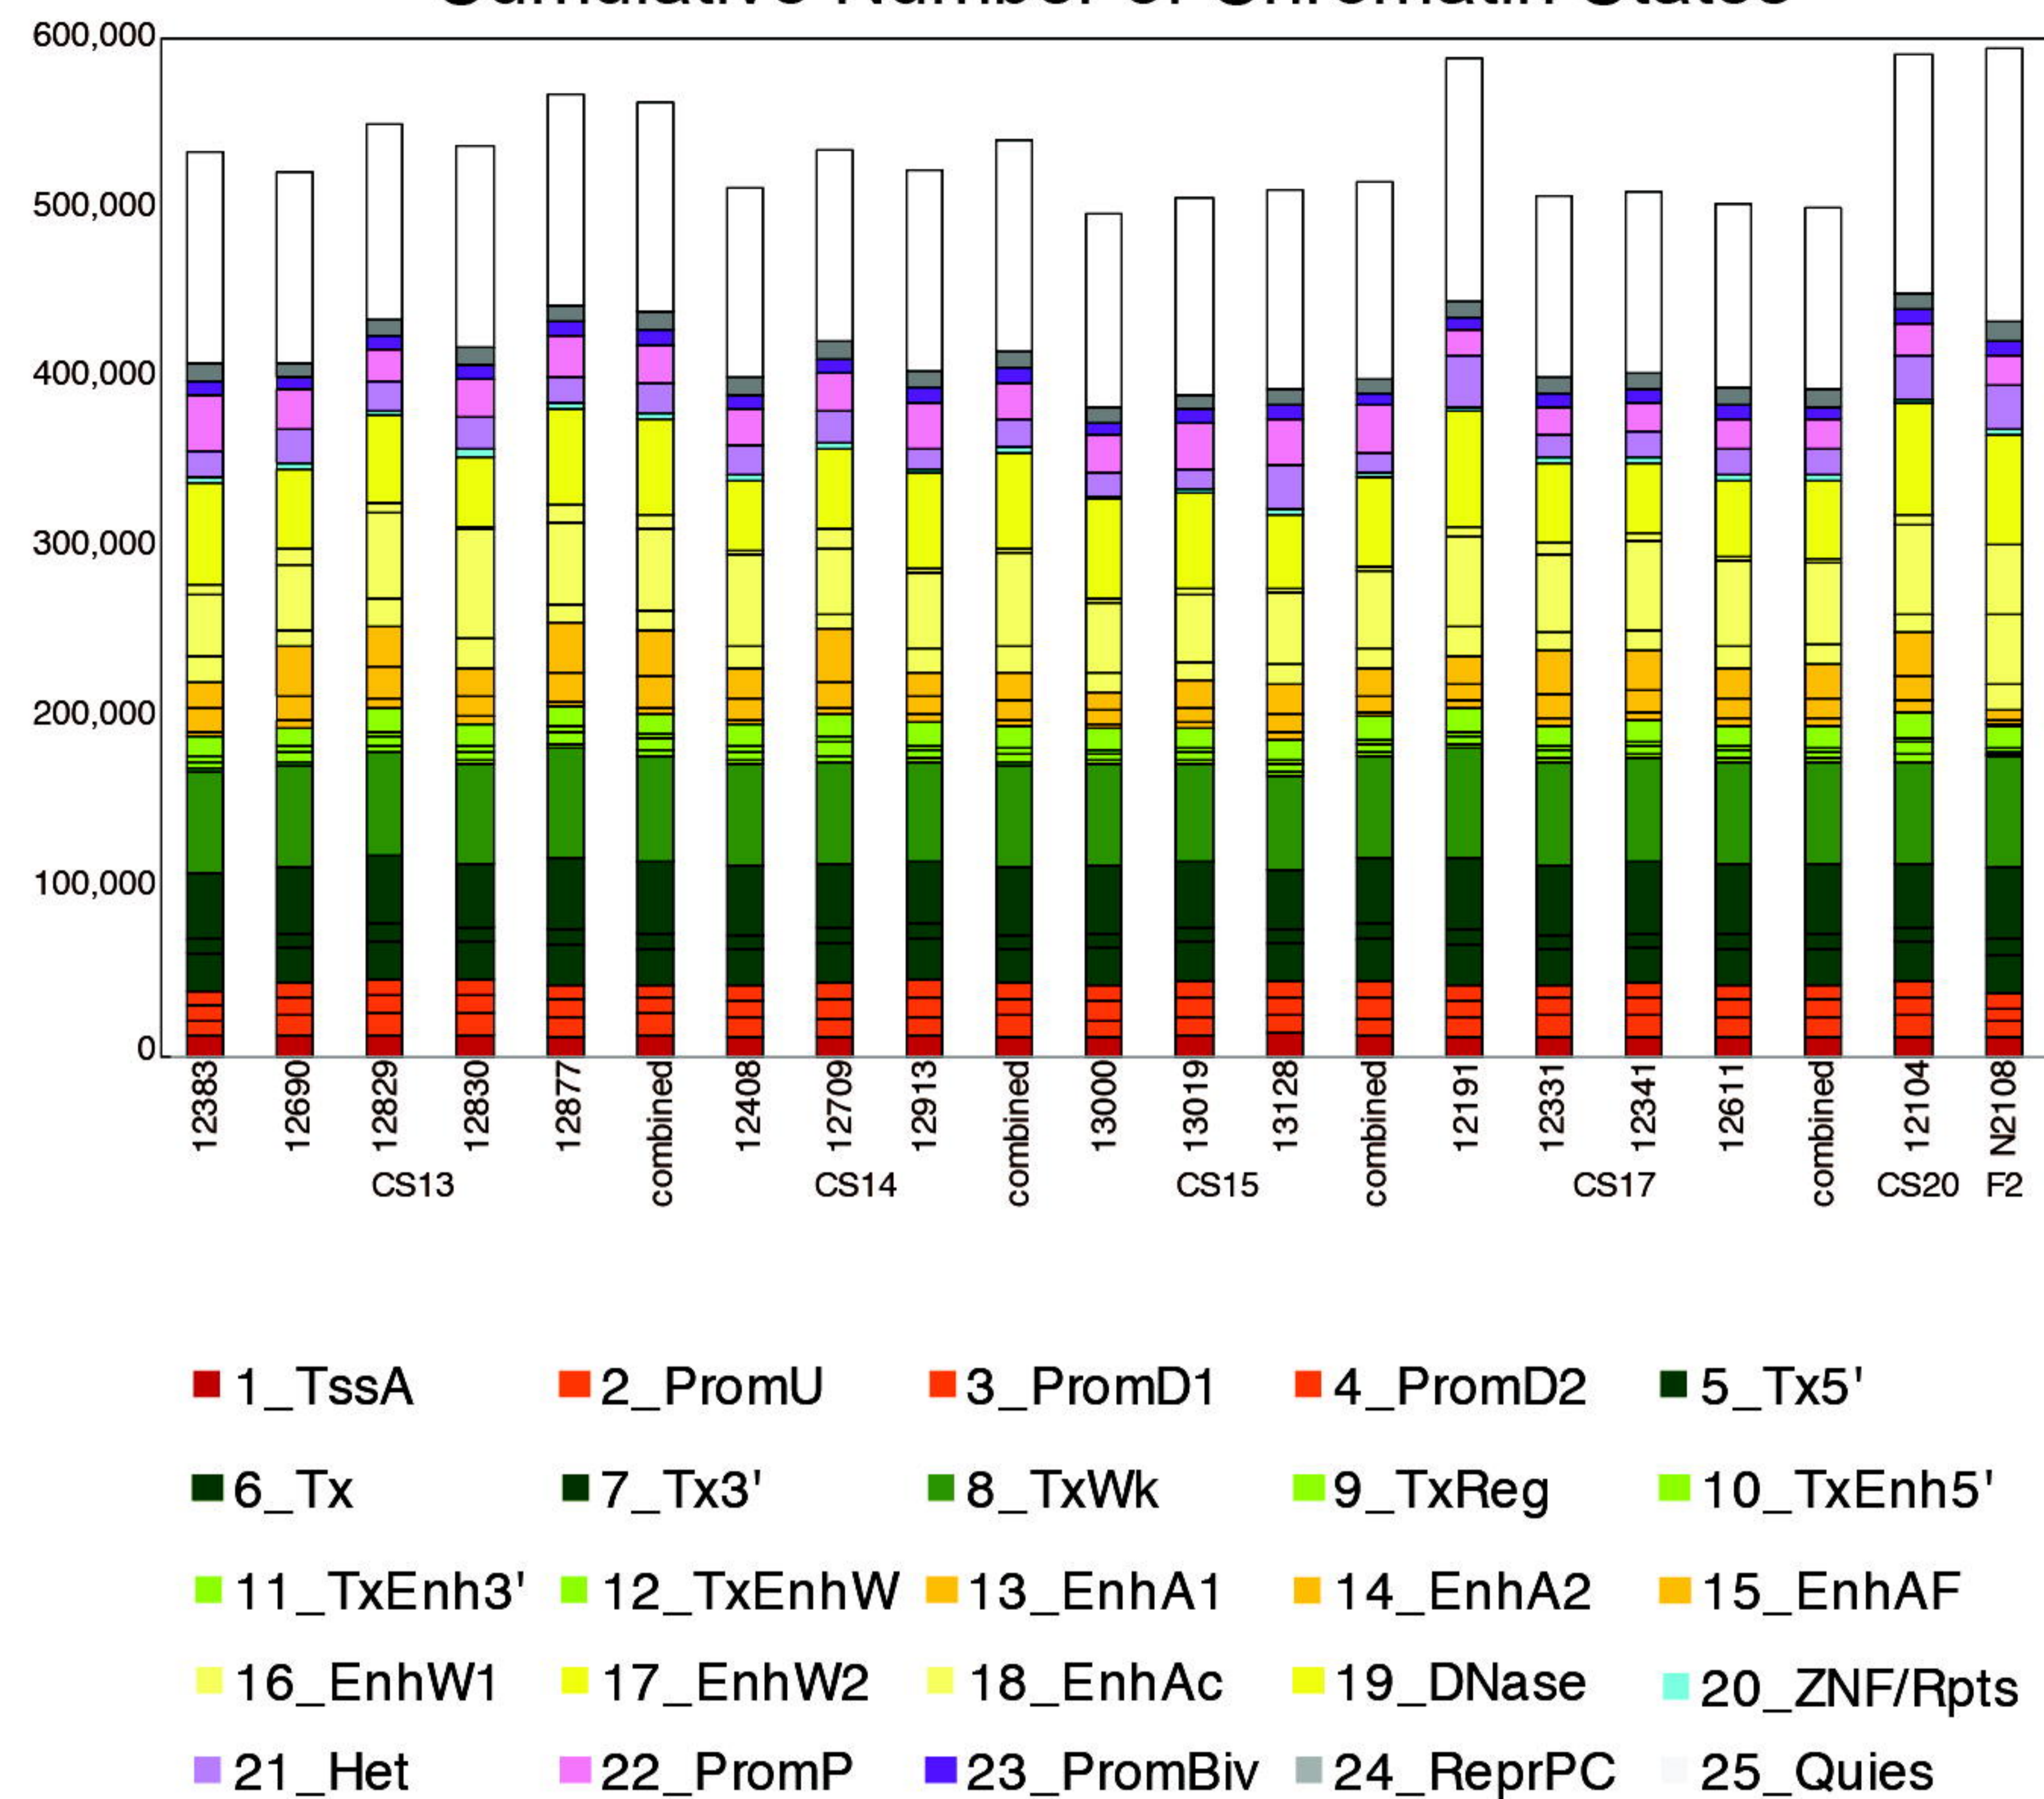

### c Cumulative Percentage Chromatin States

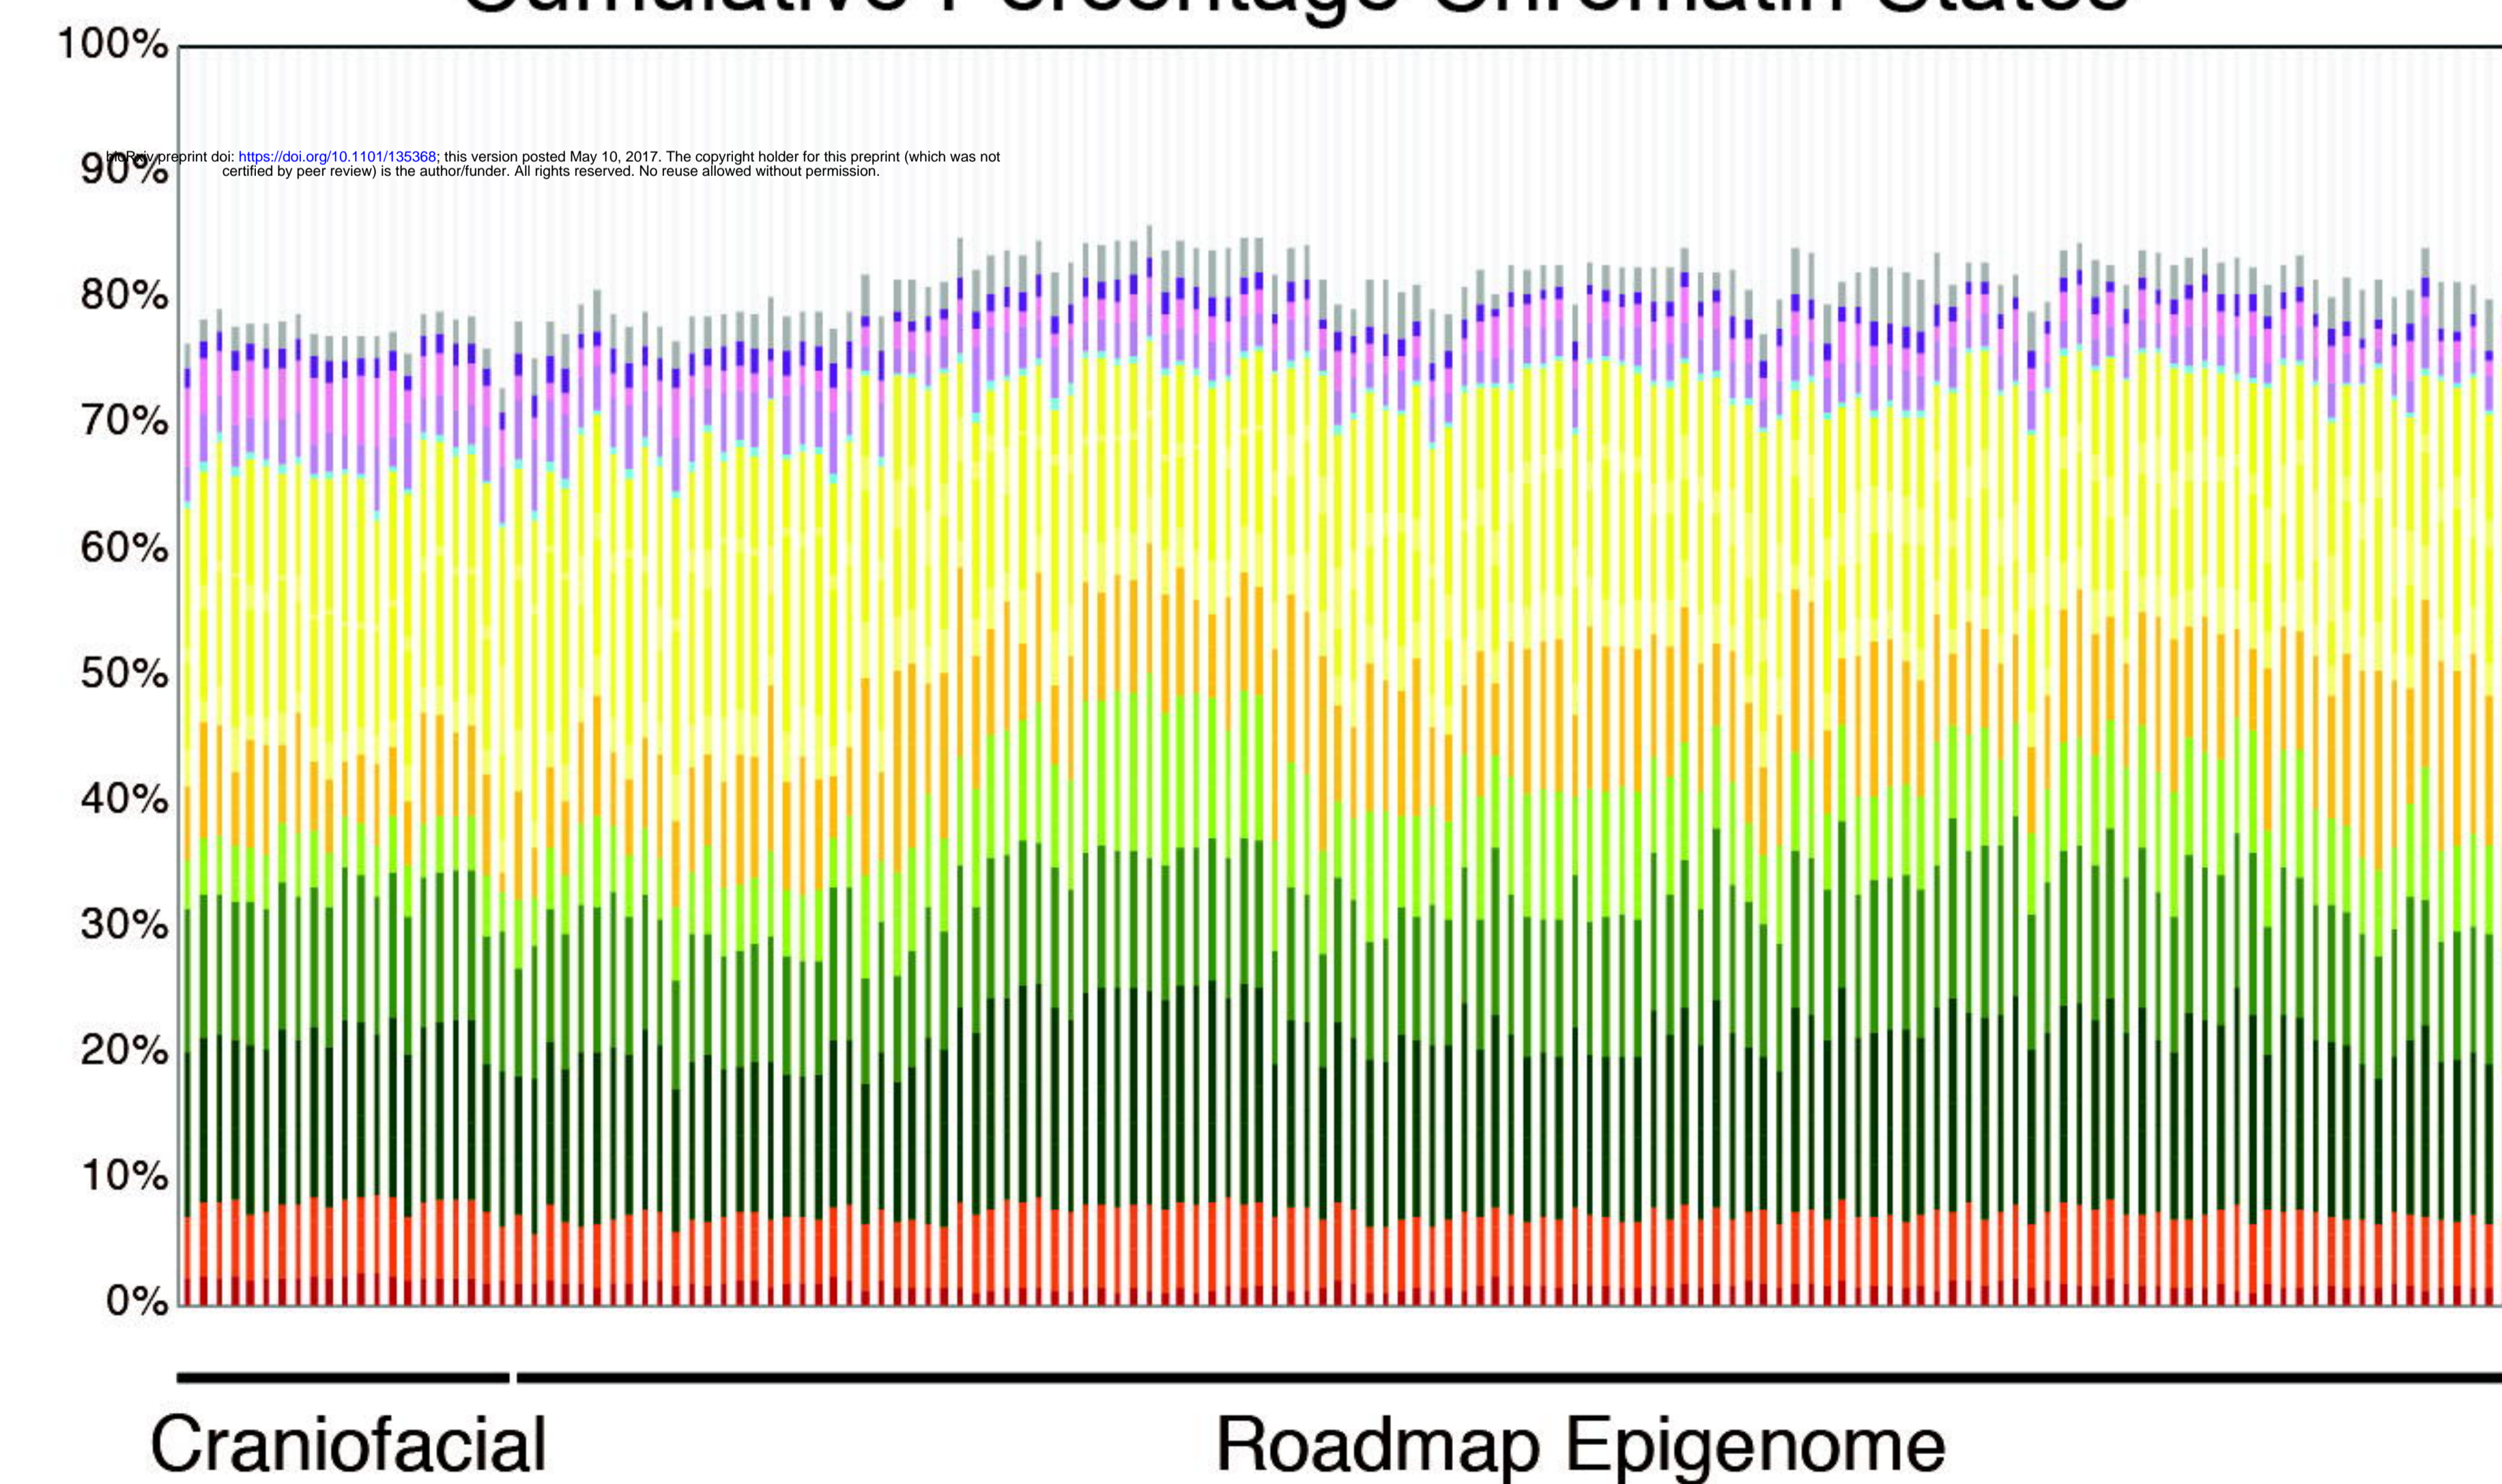

### d Average Number of Chromatin State Segments

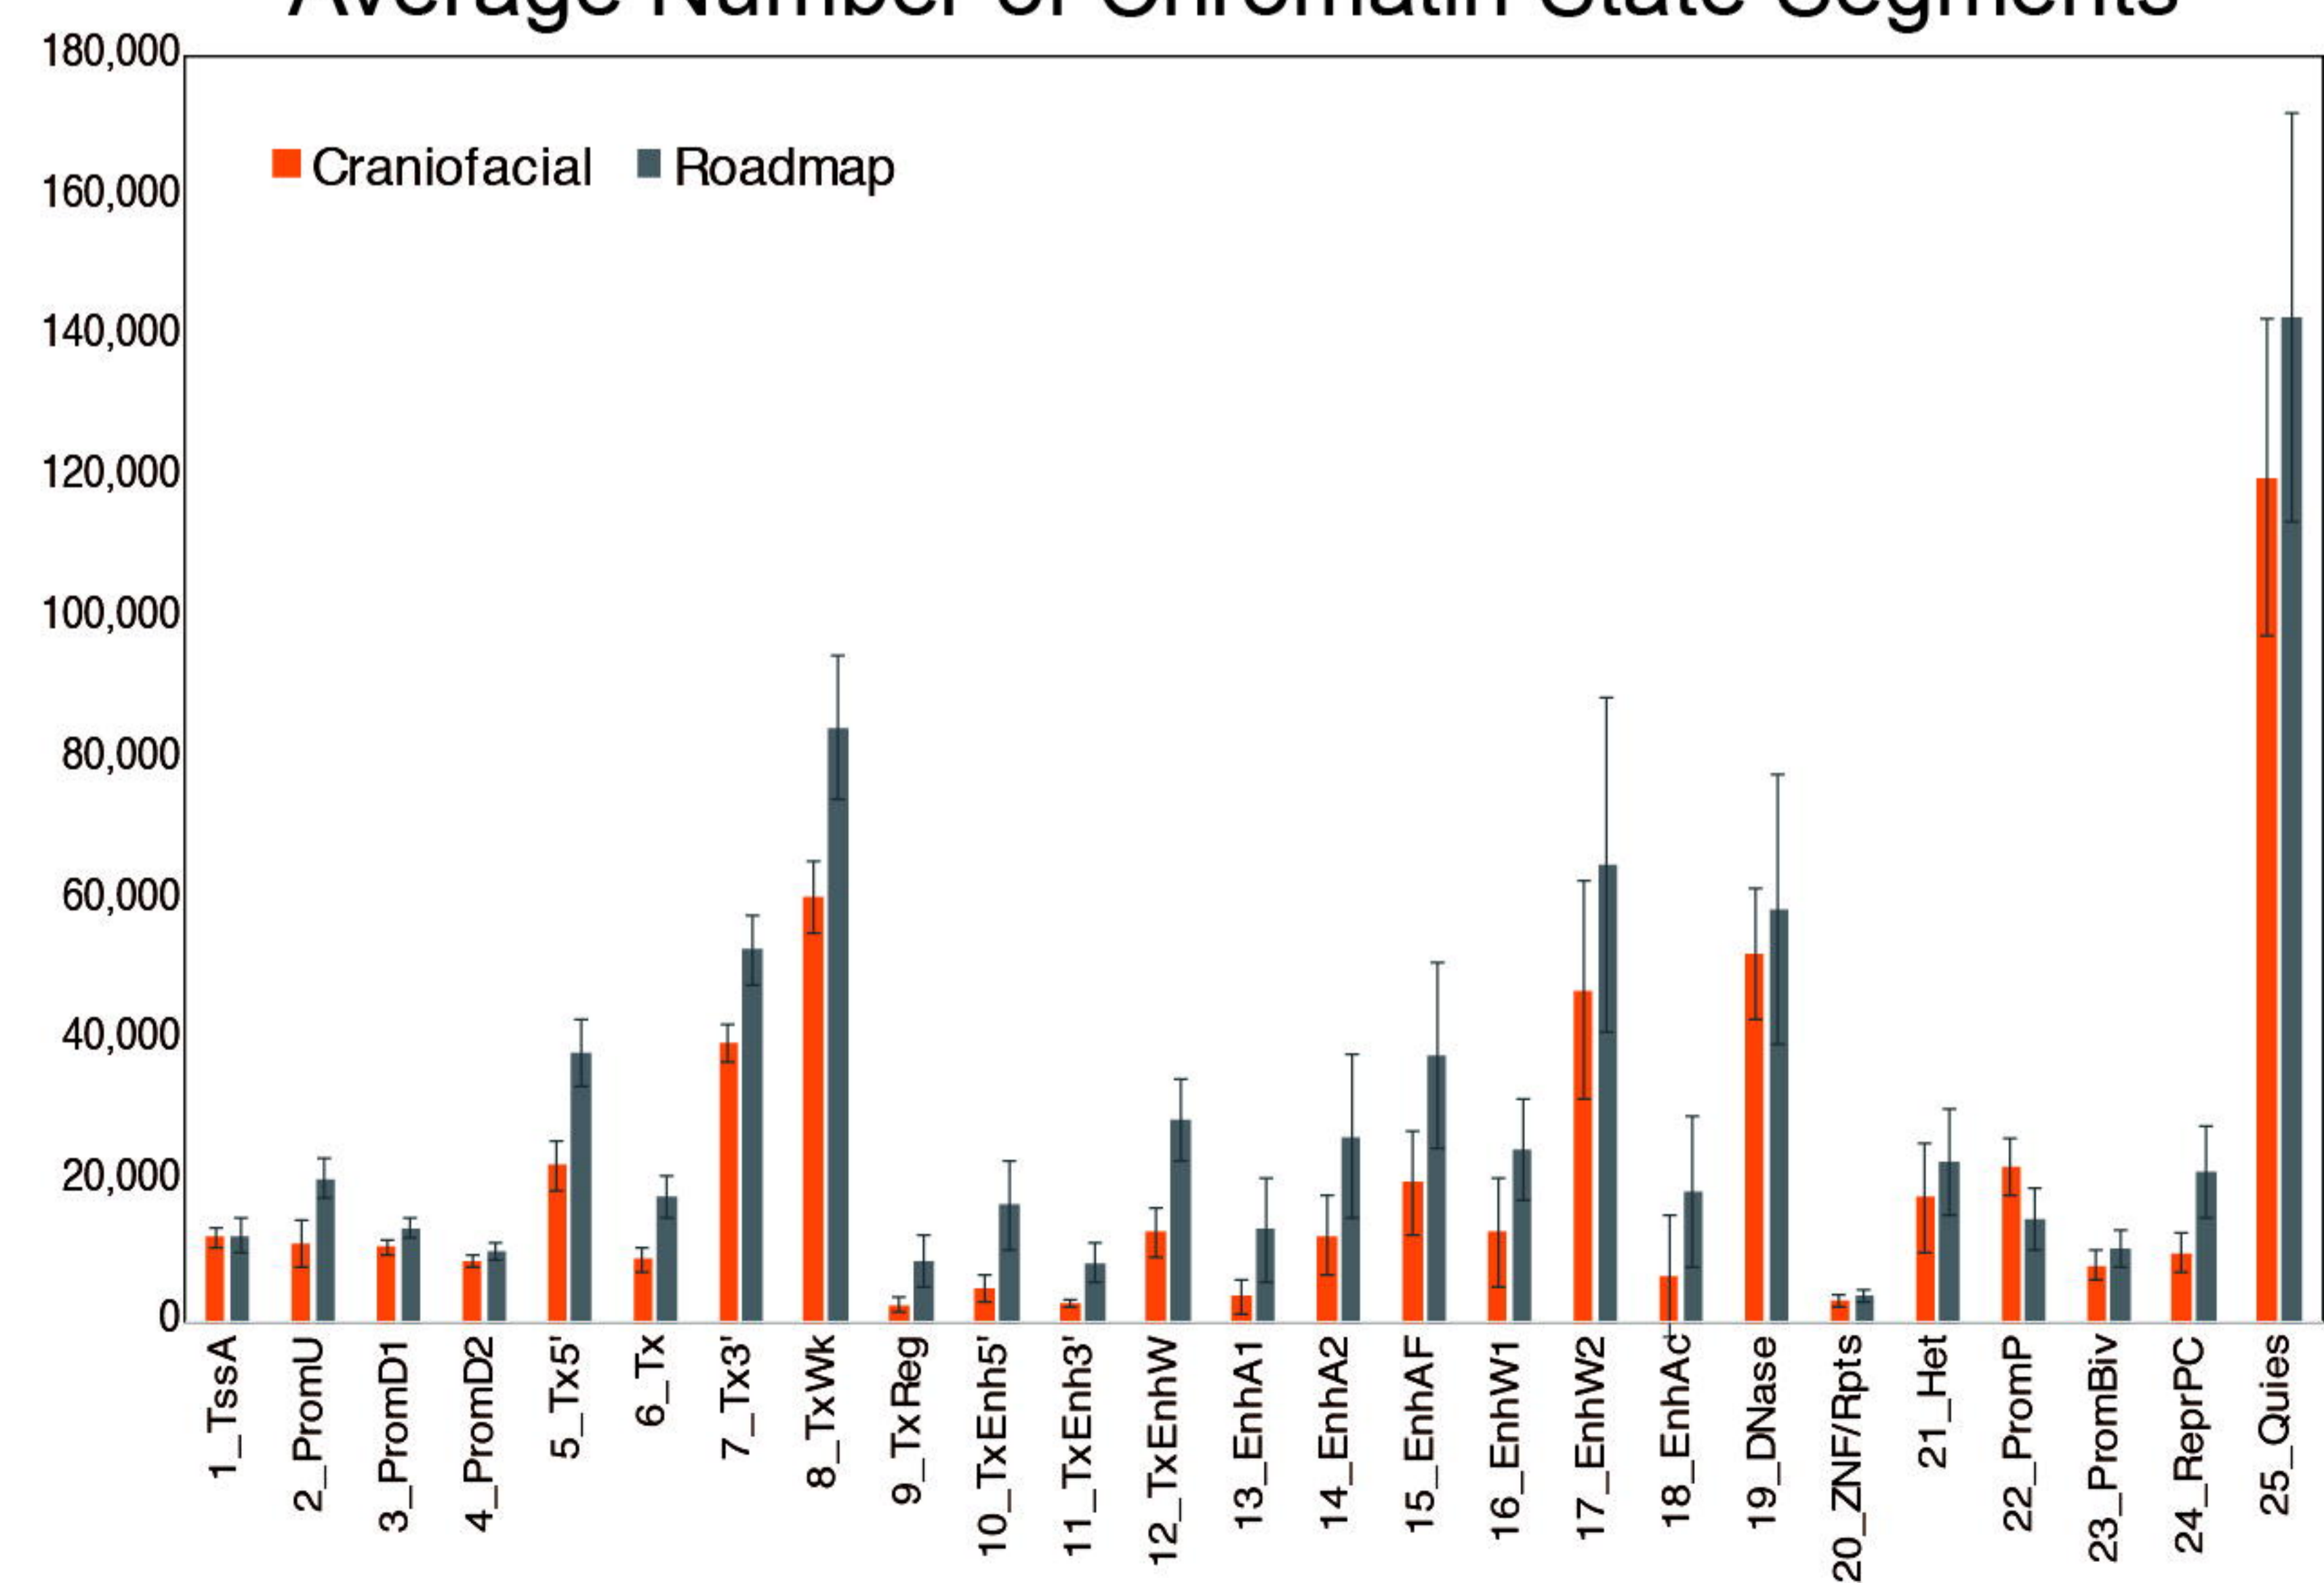



**a**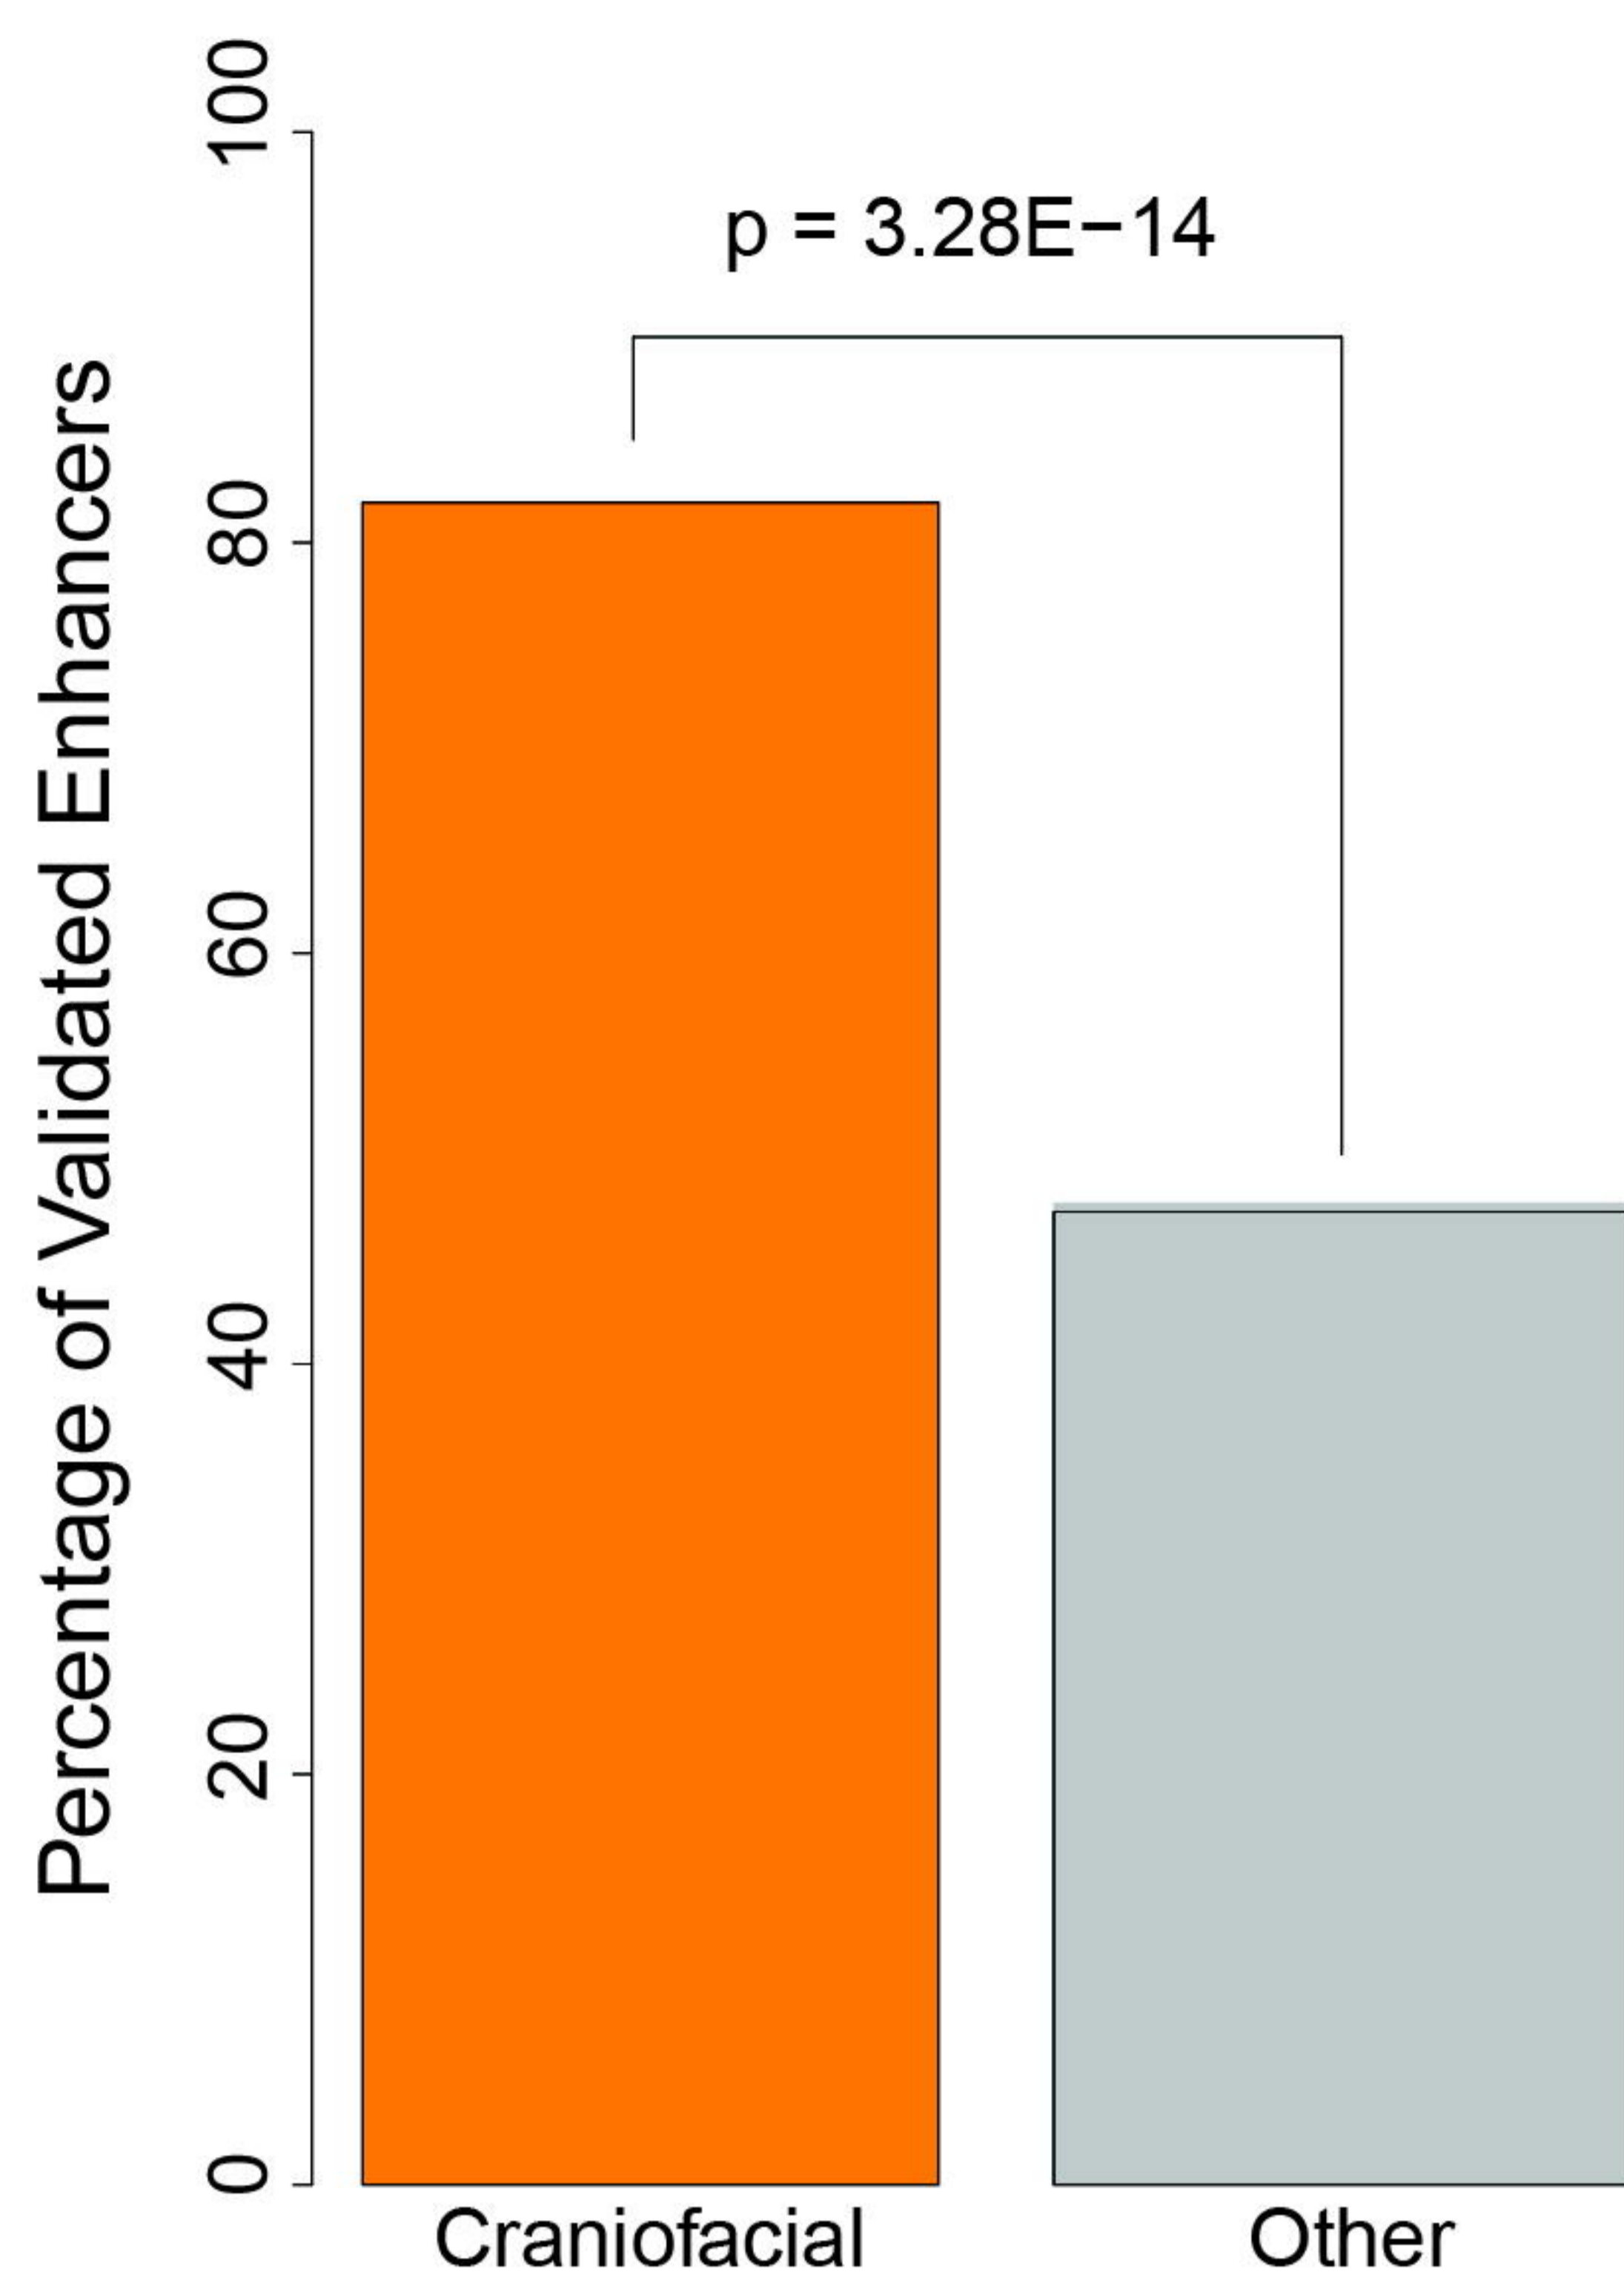**b**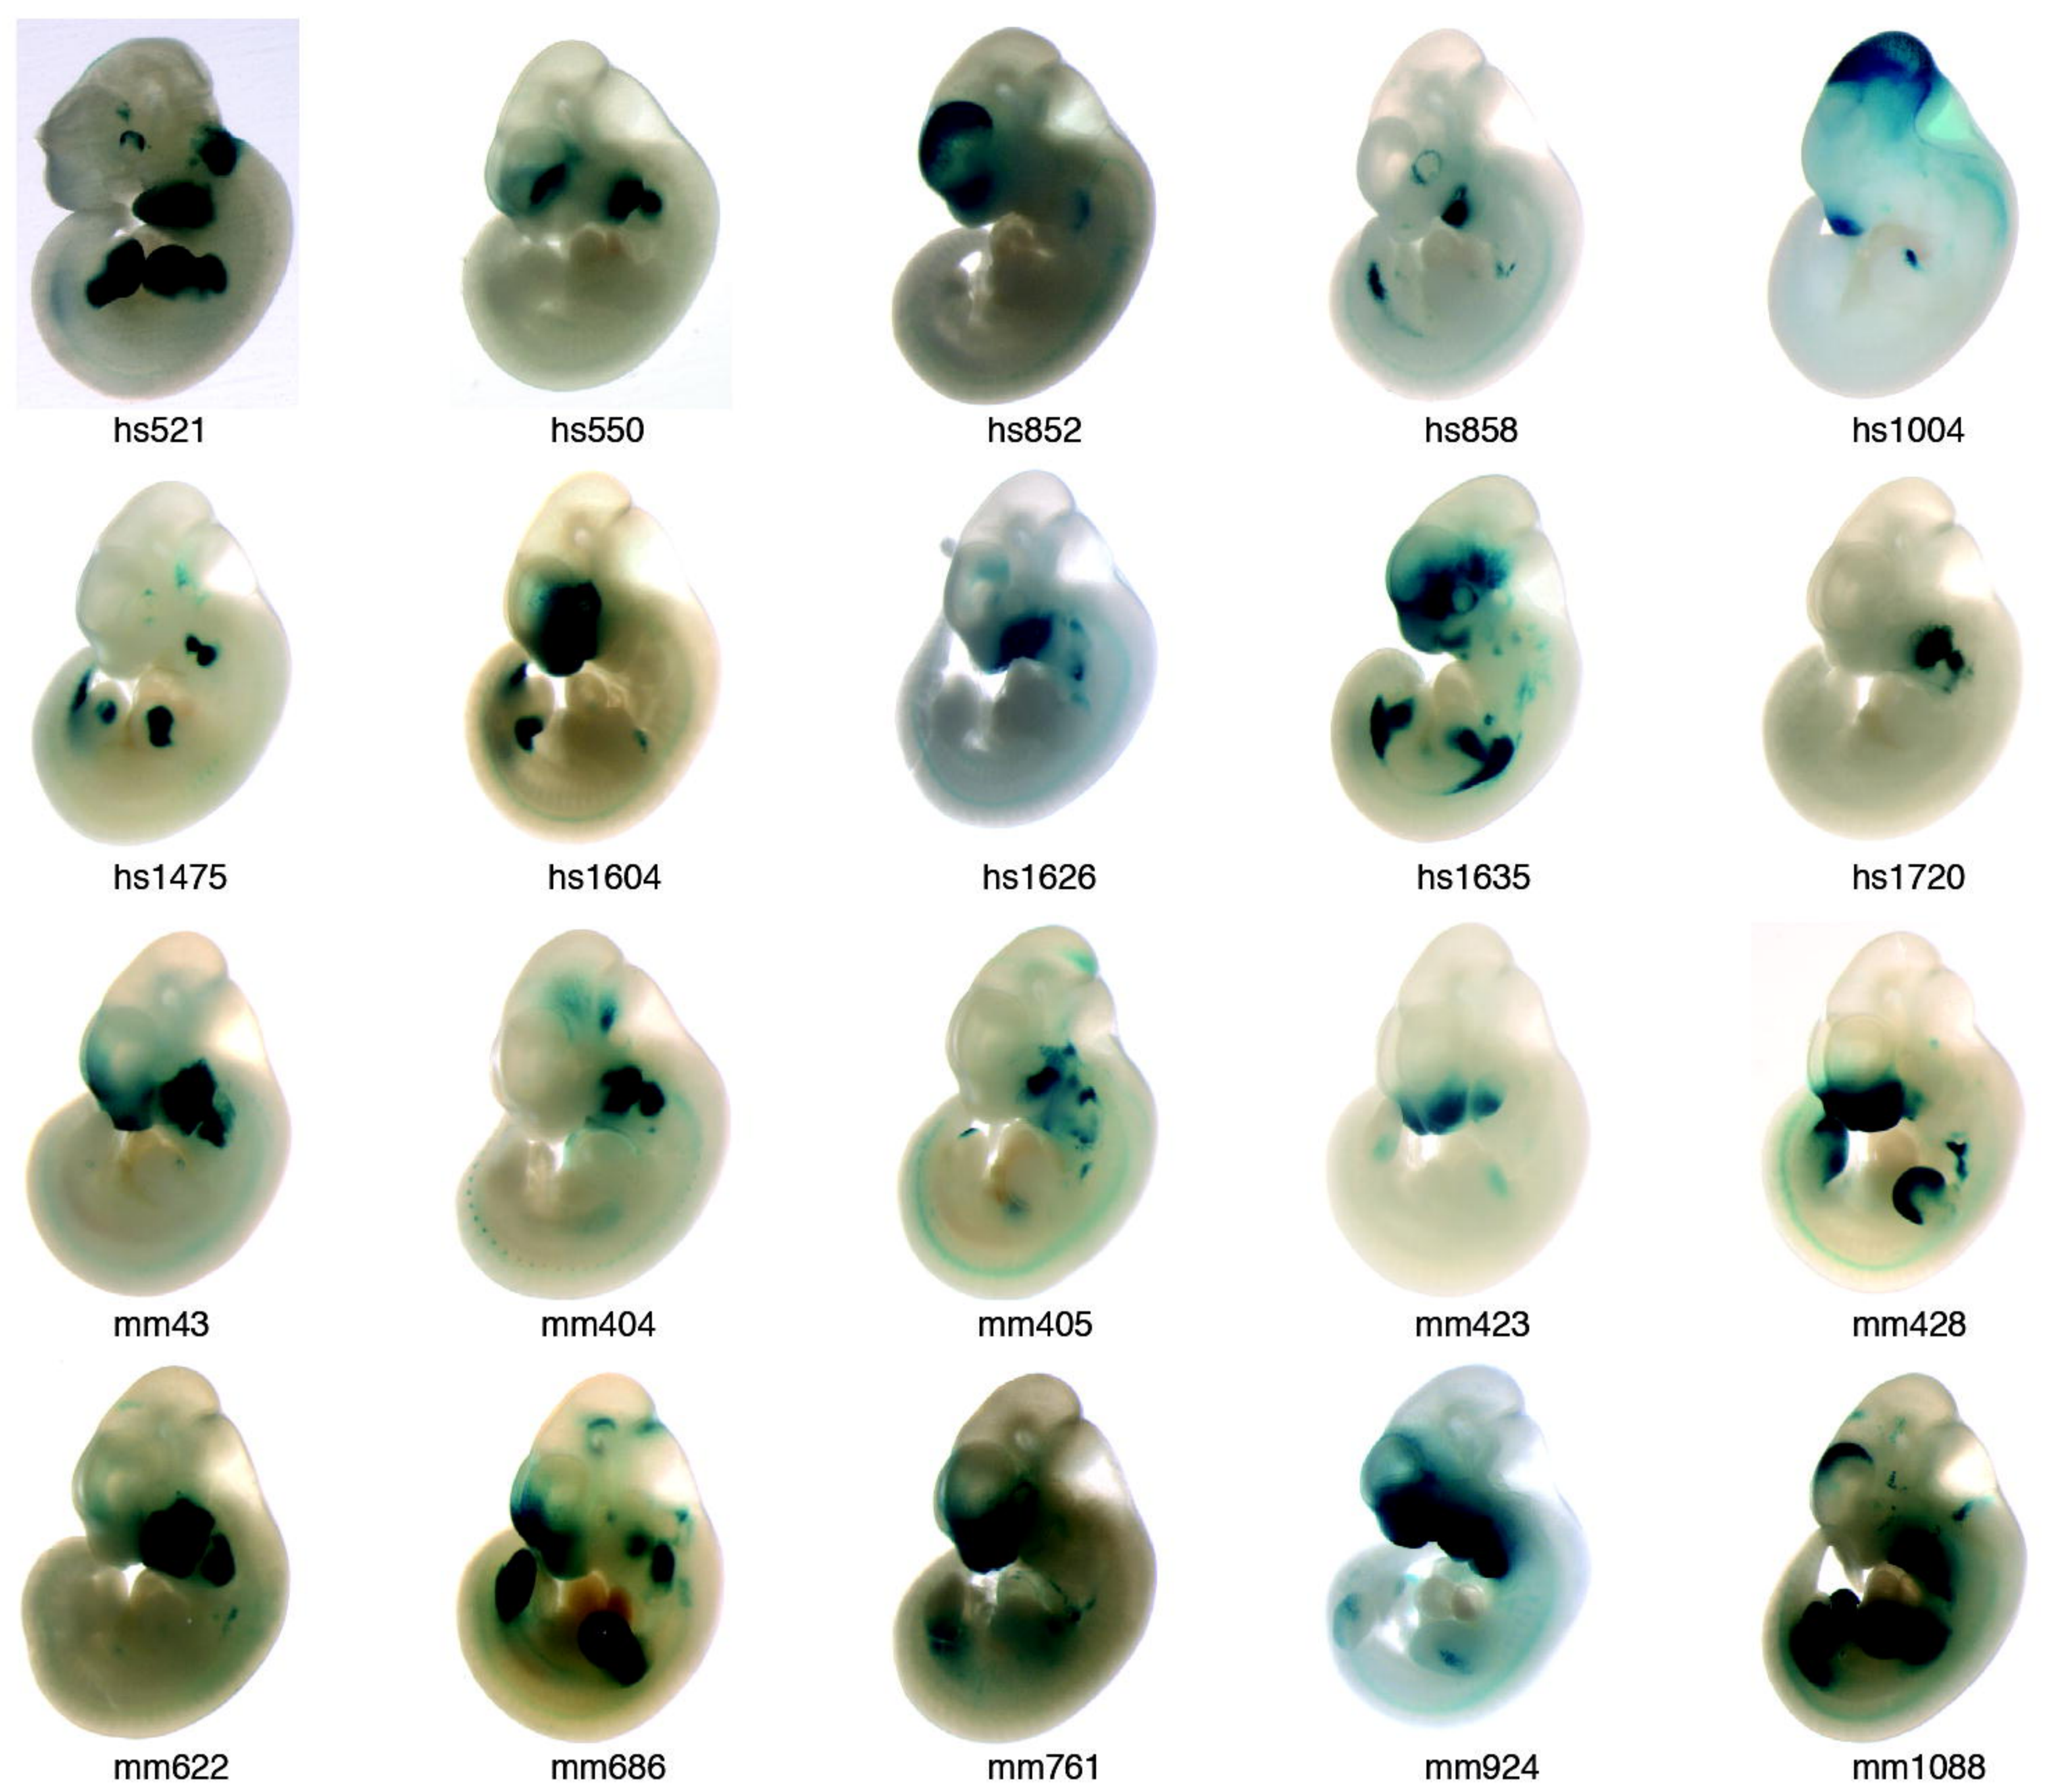**c**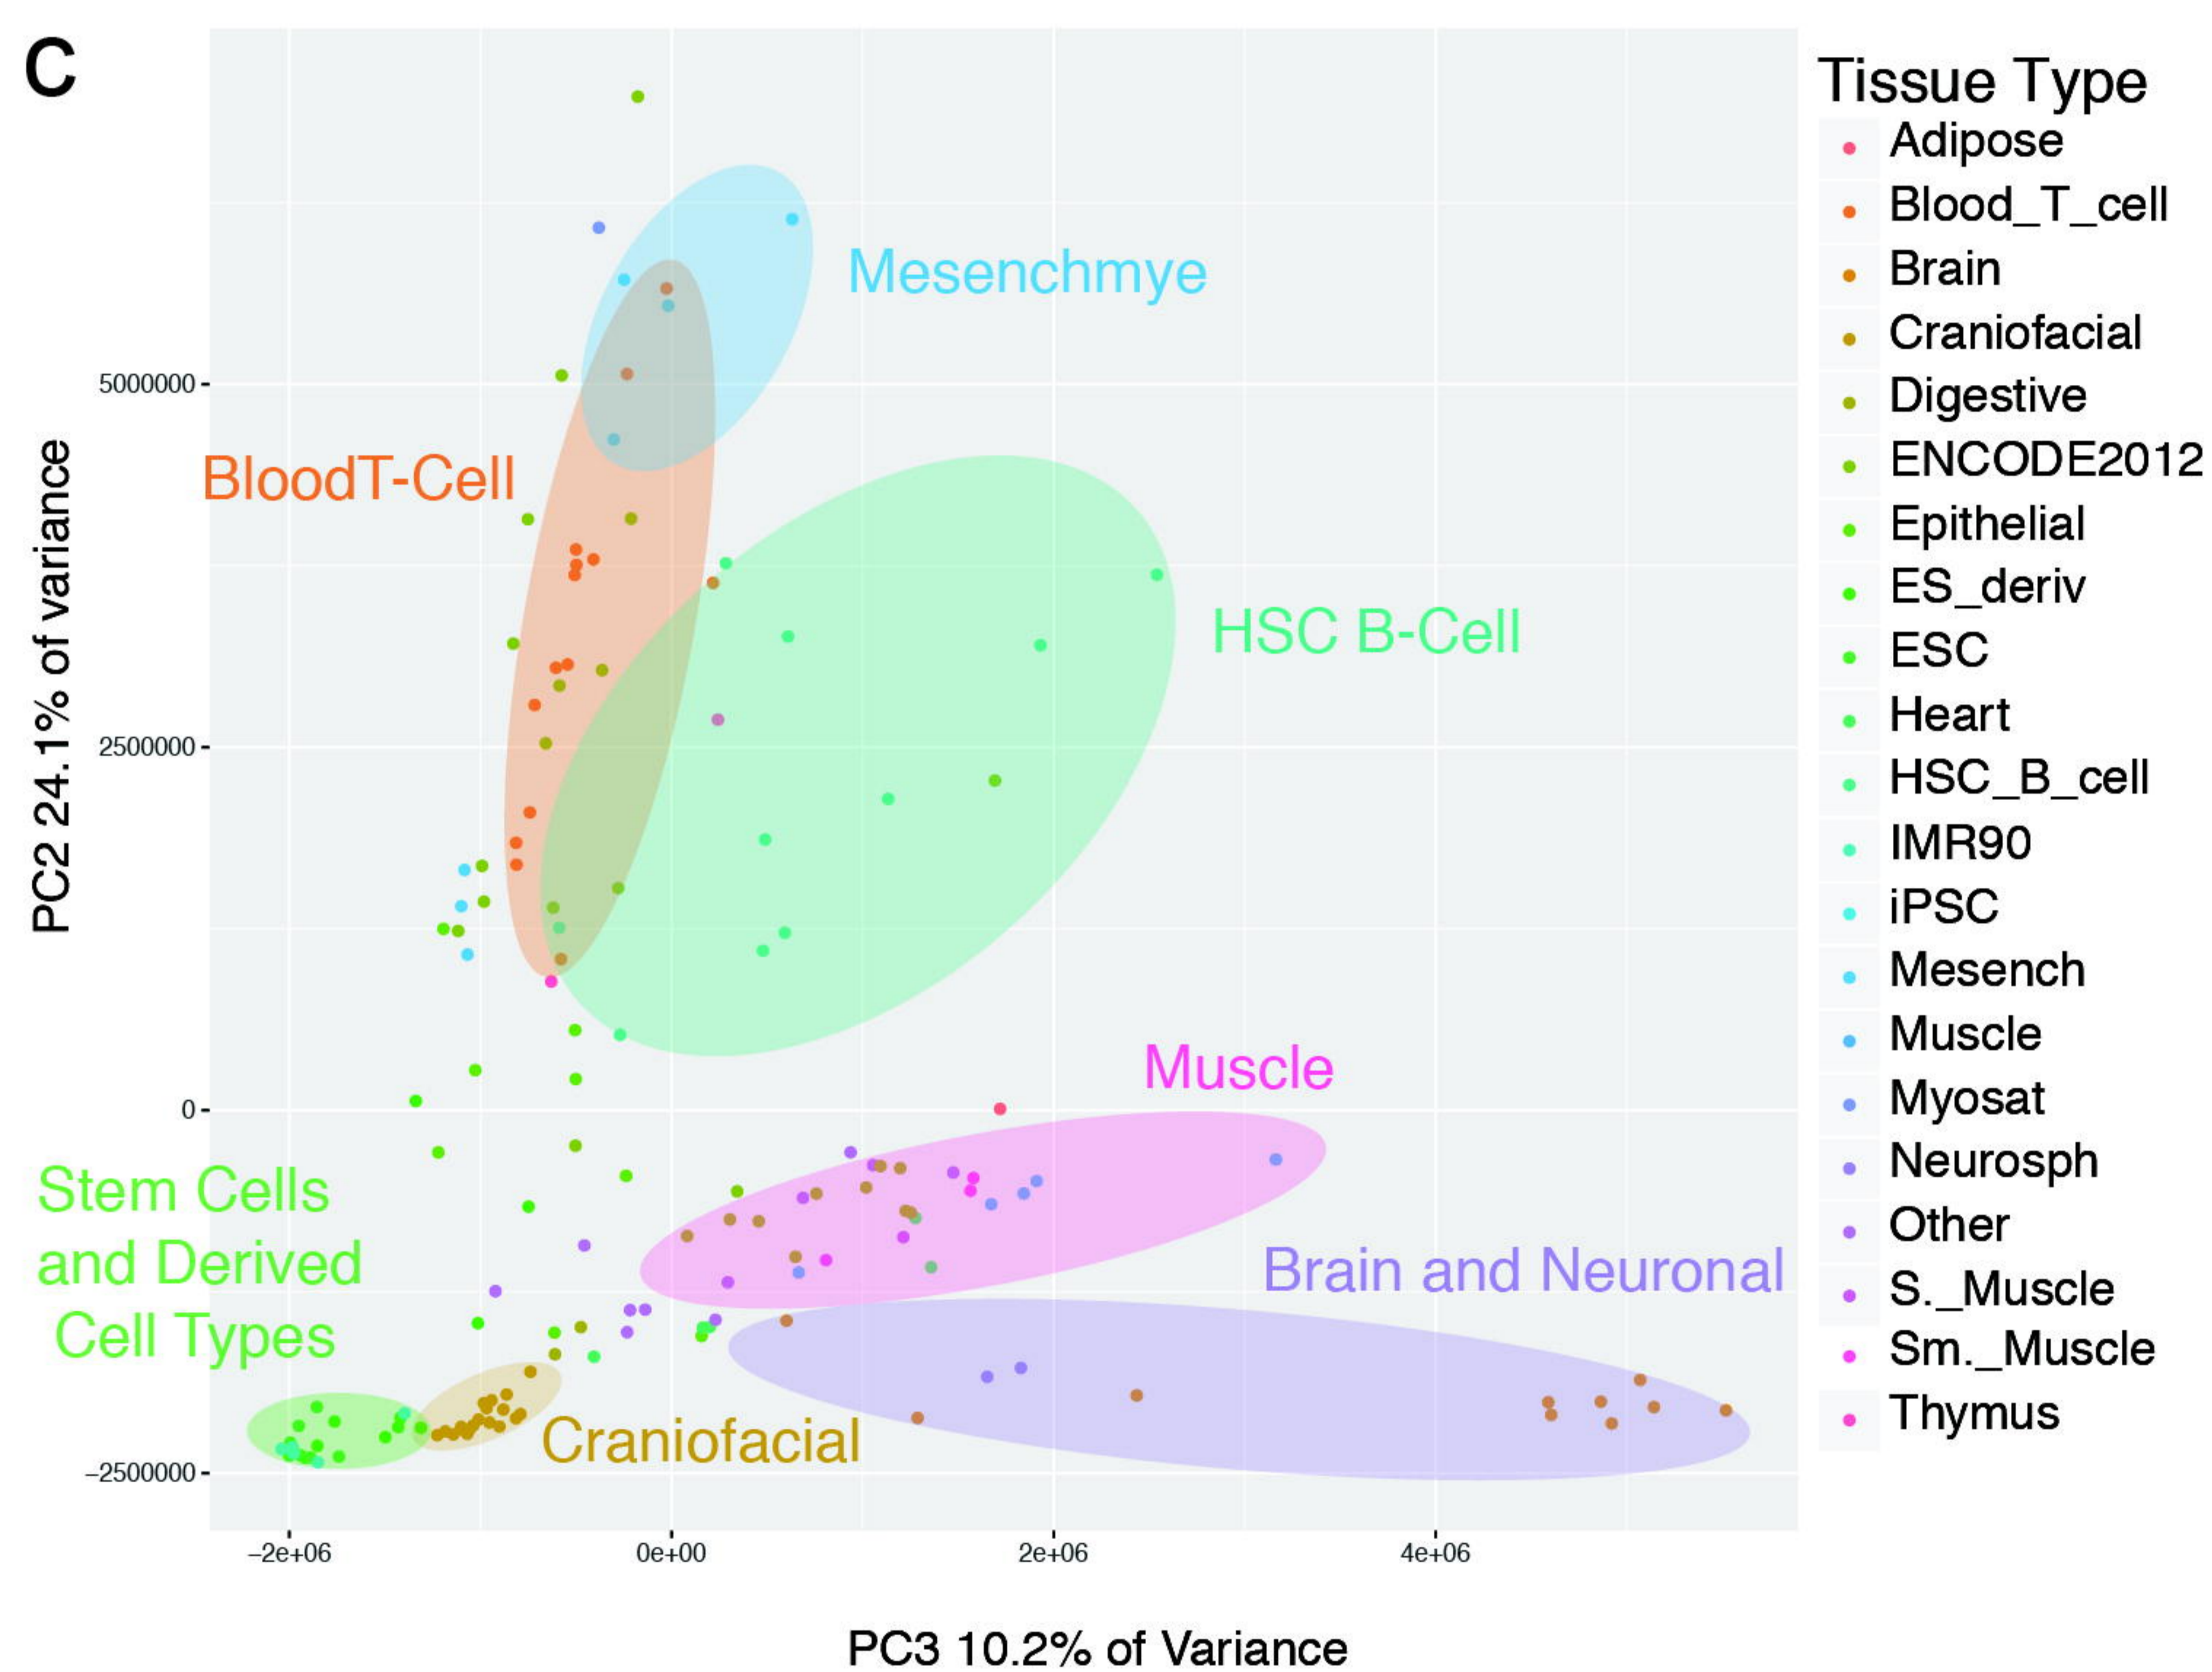**d**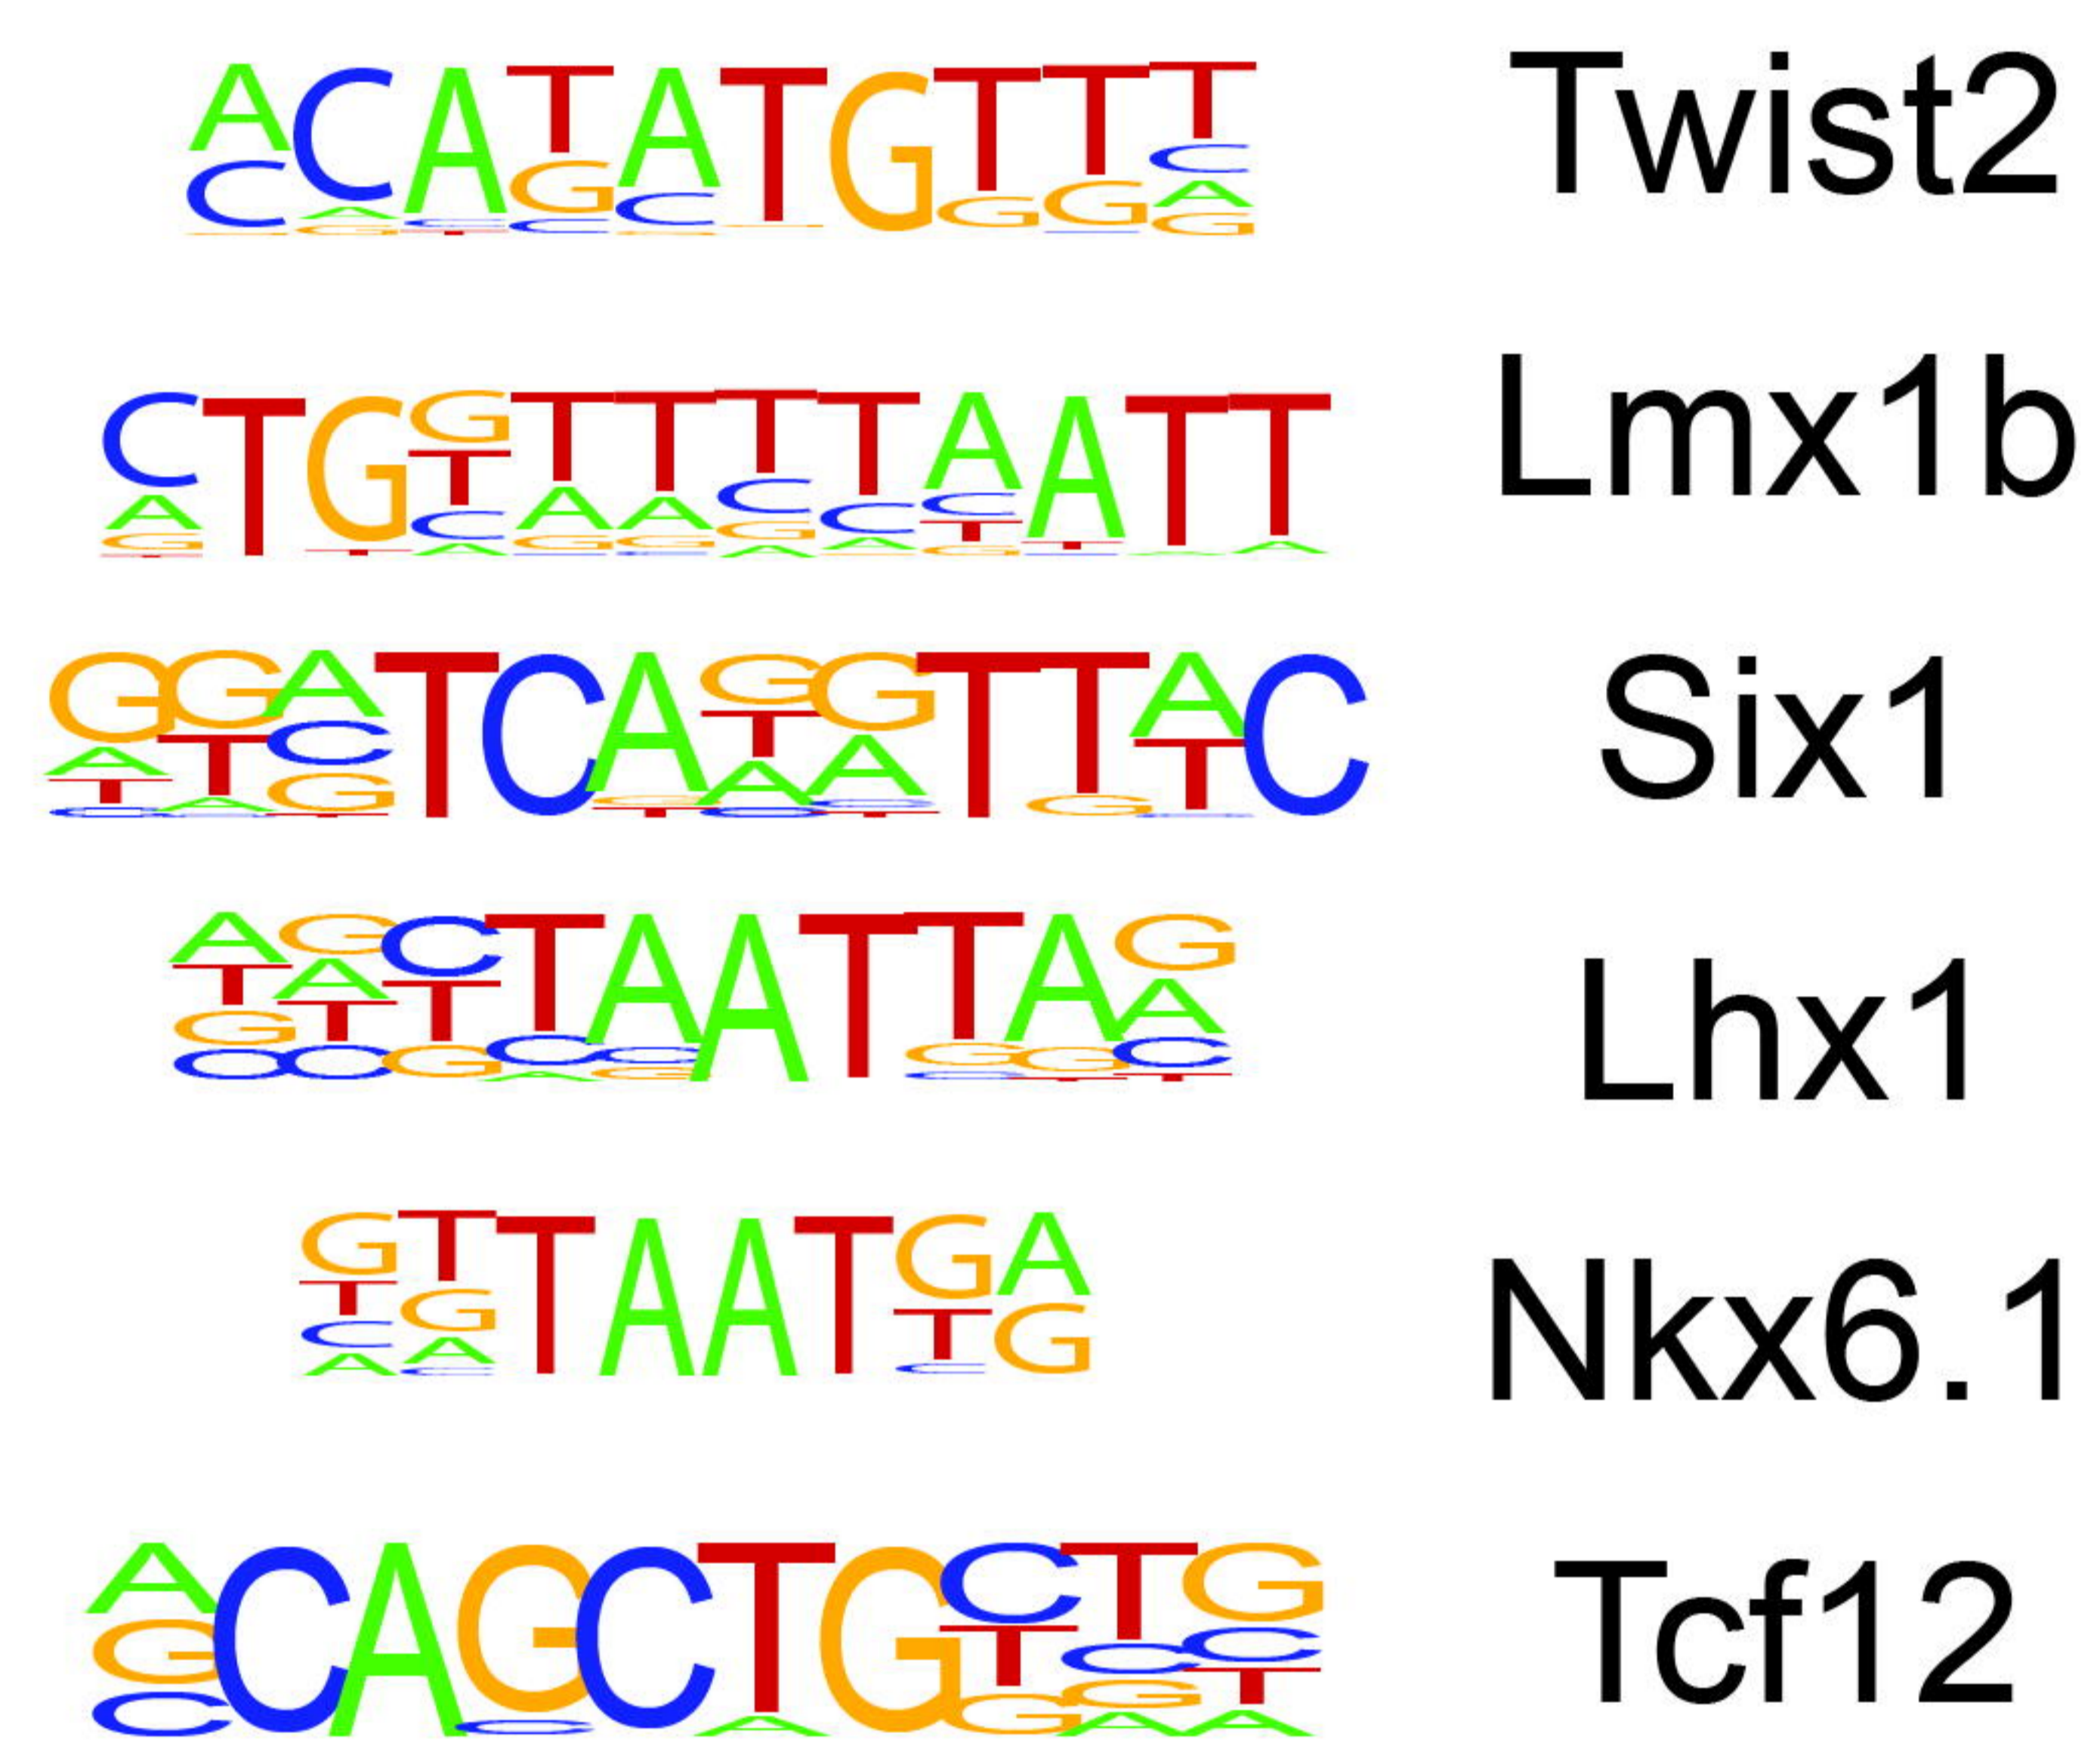**e**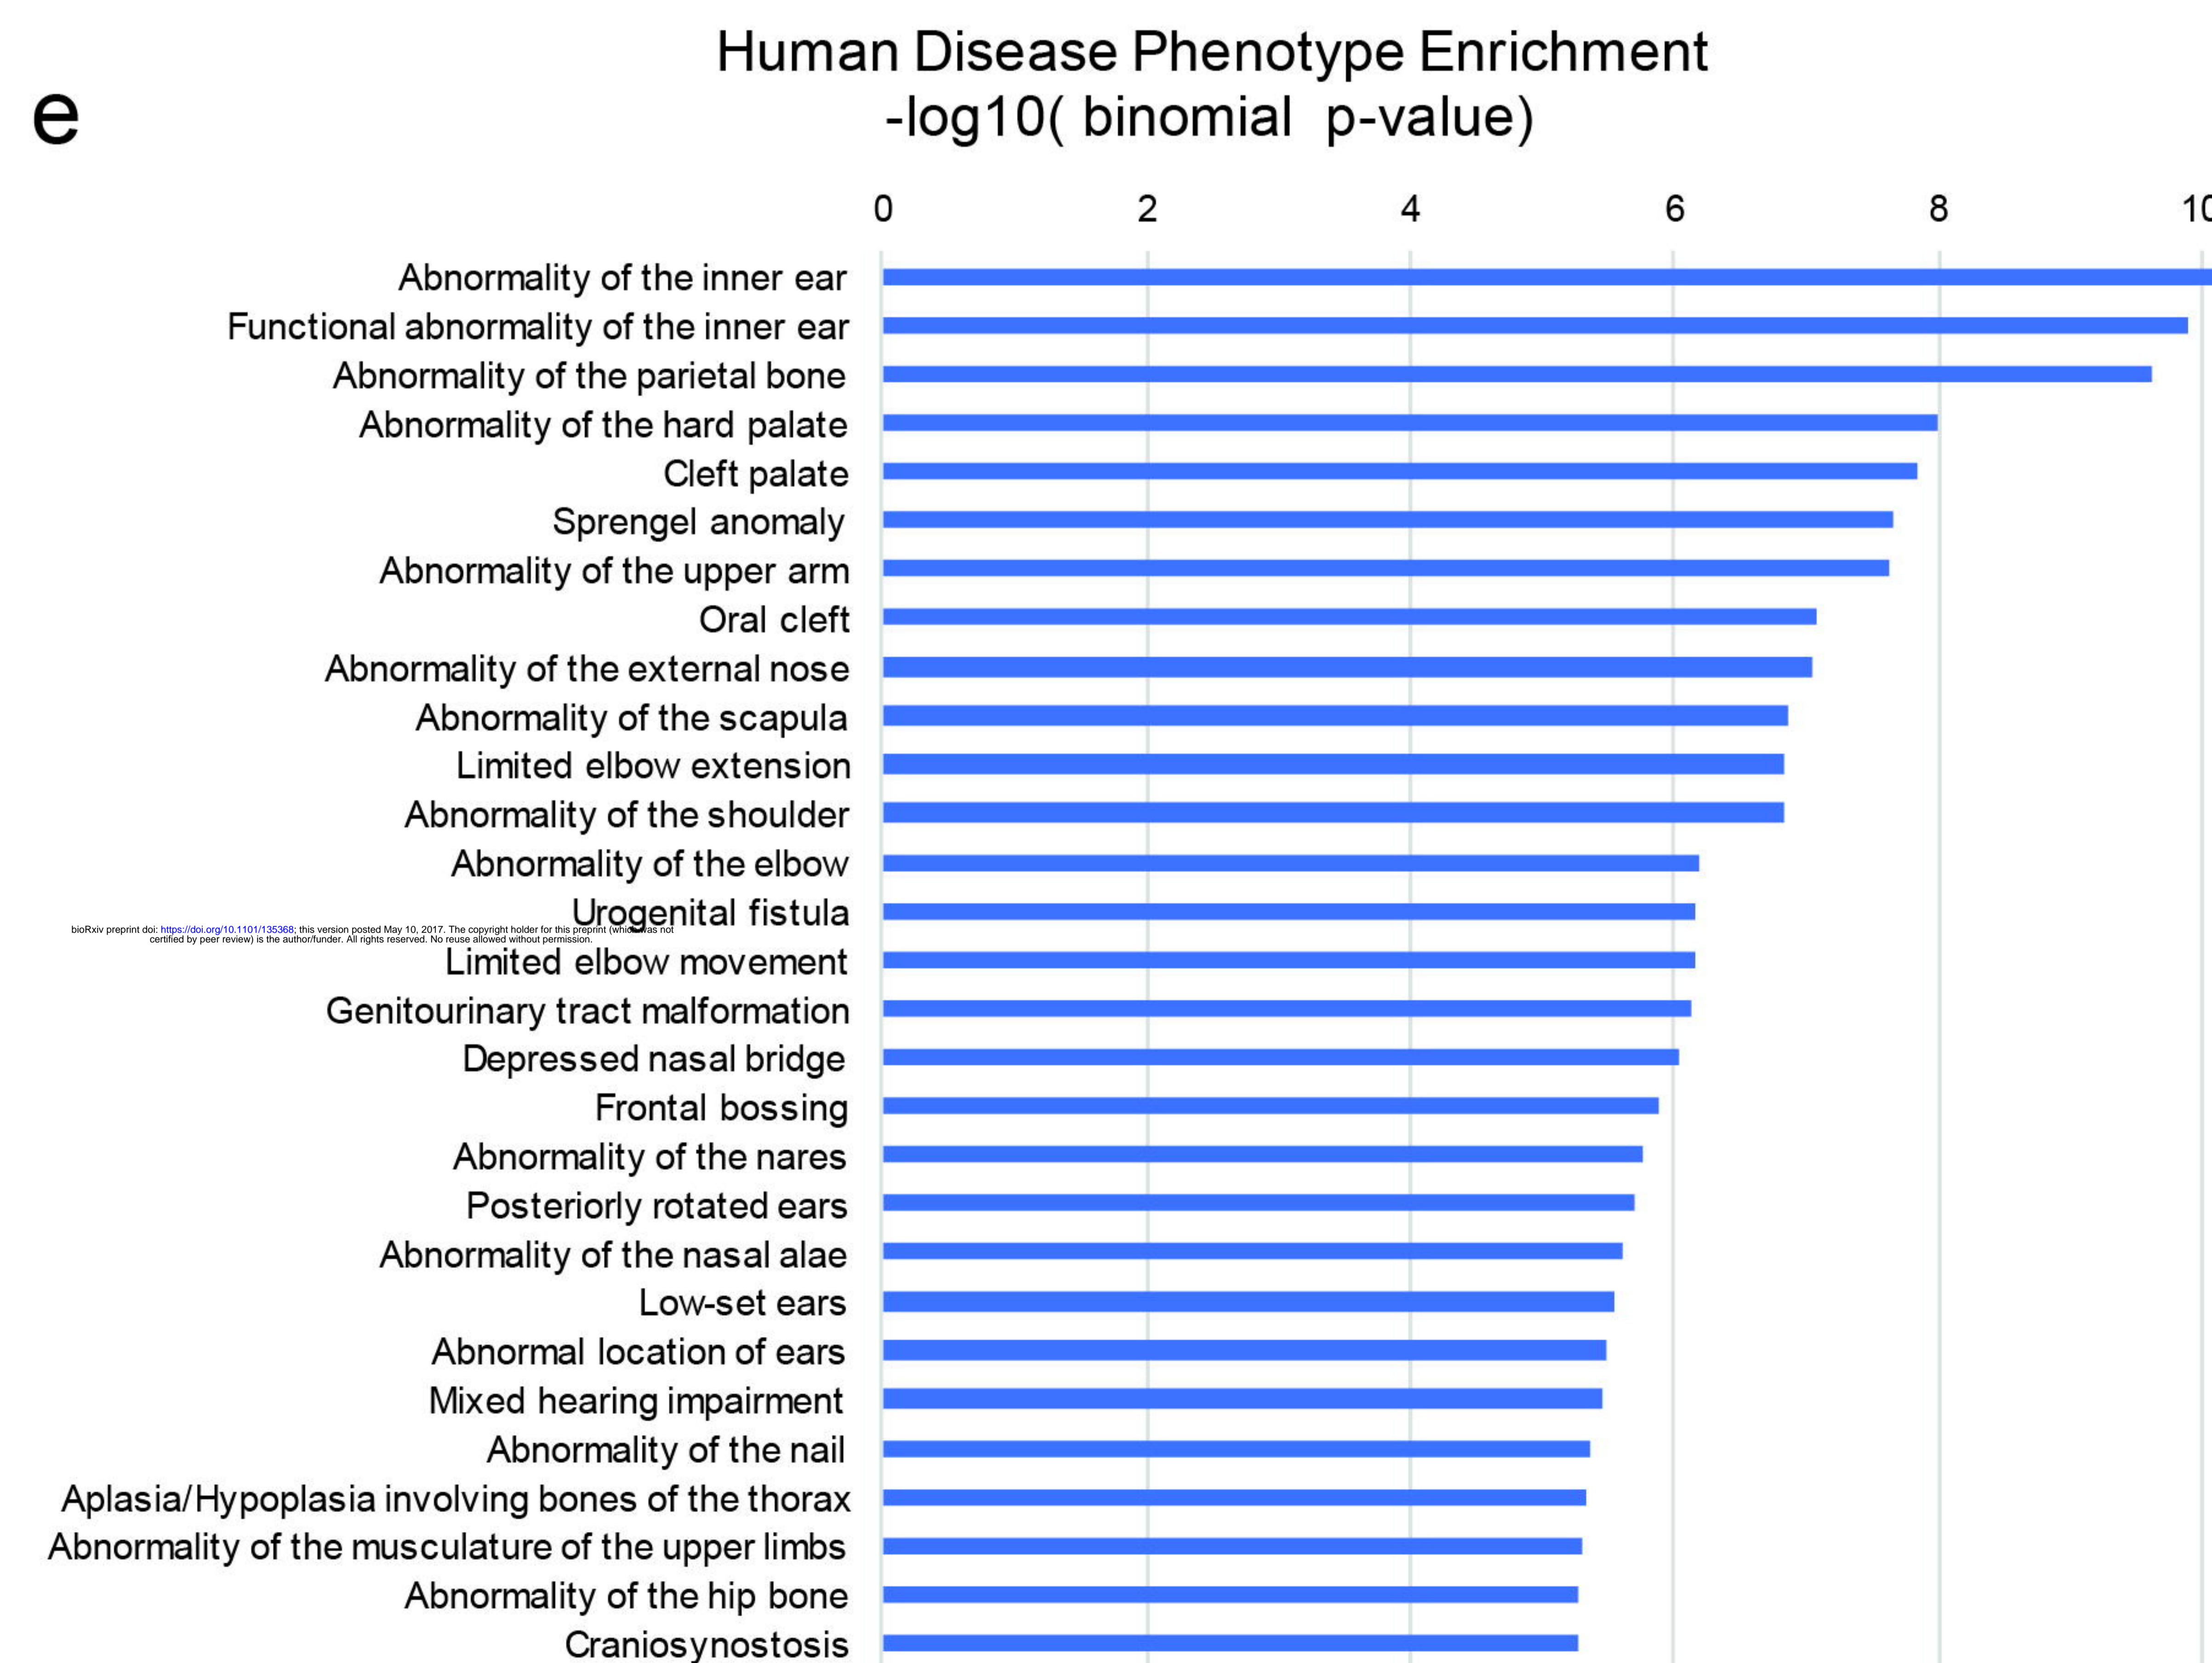**f**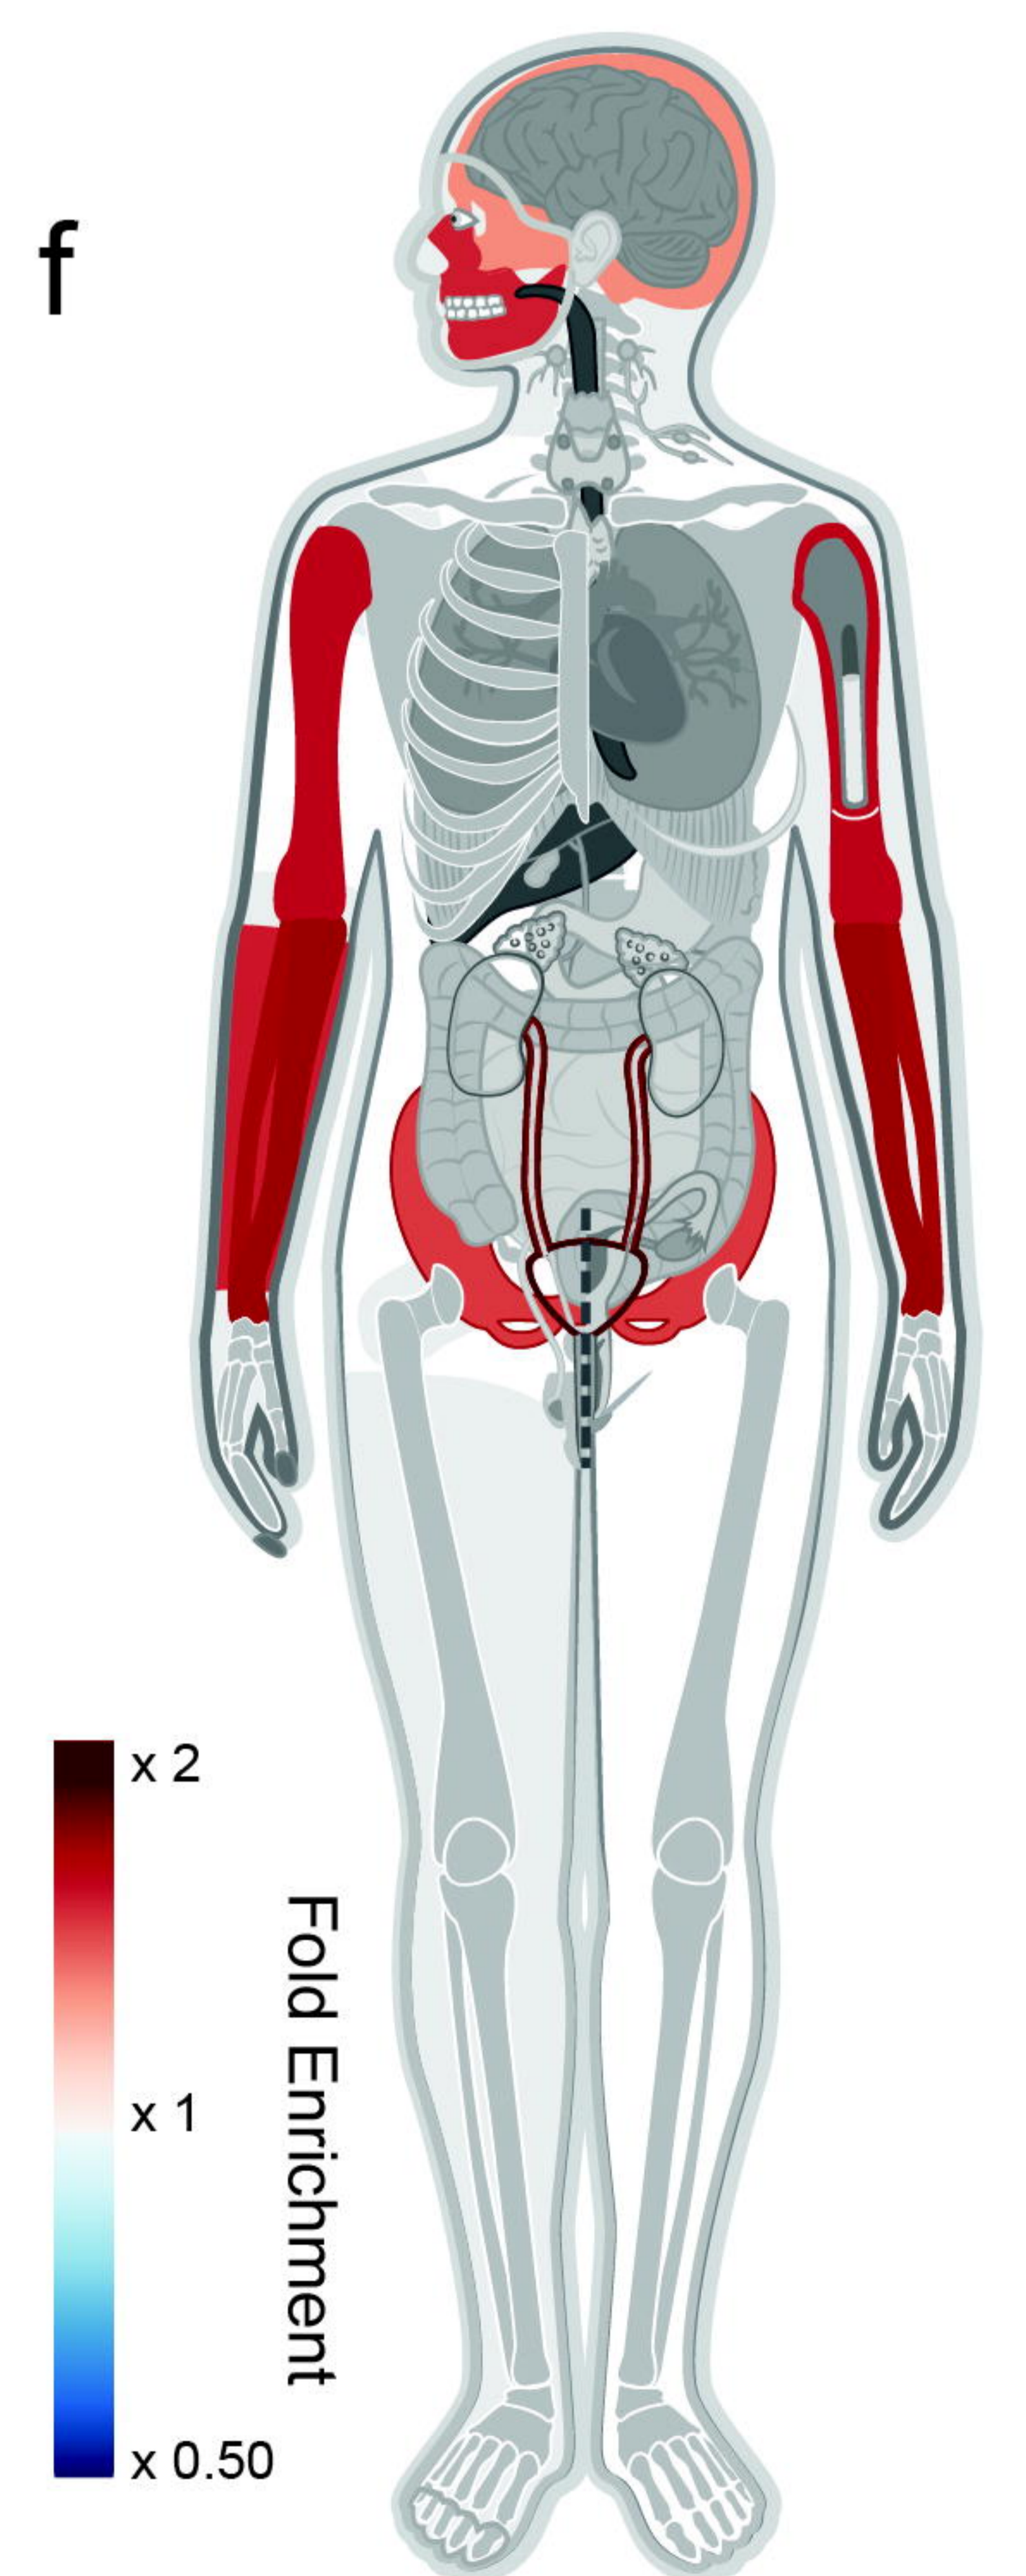



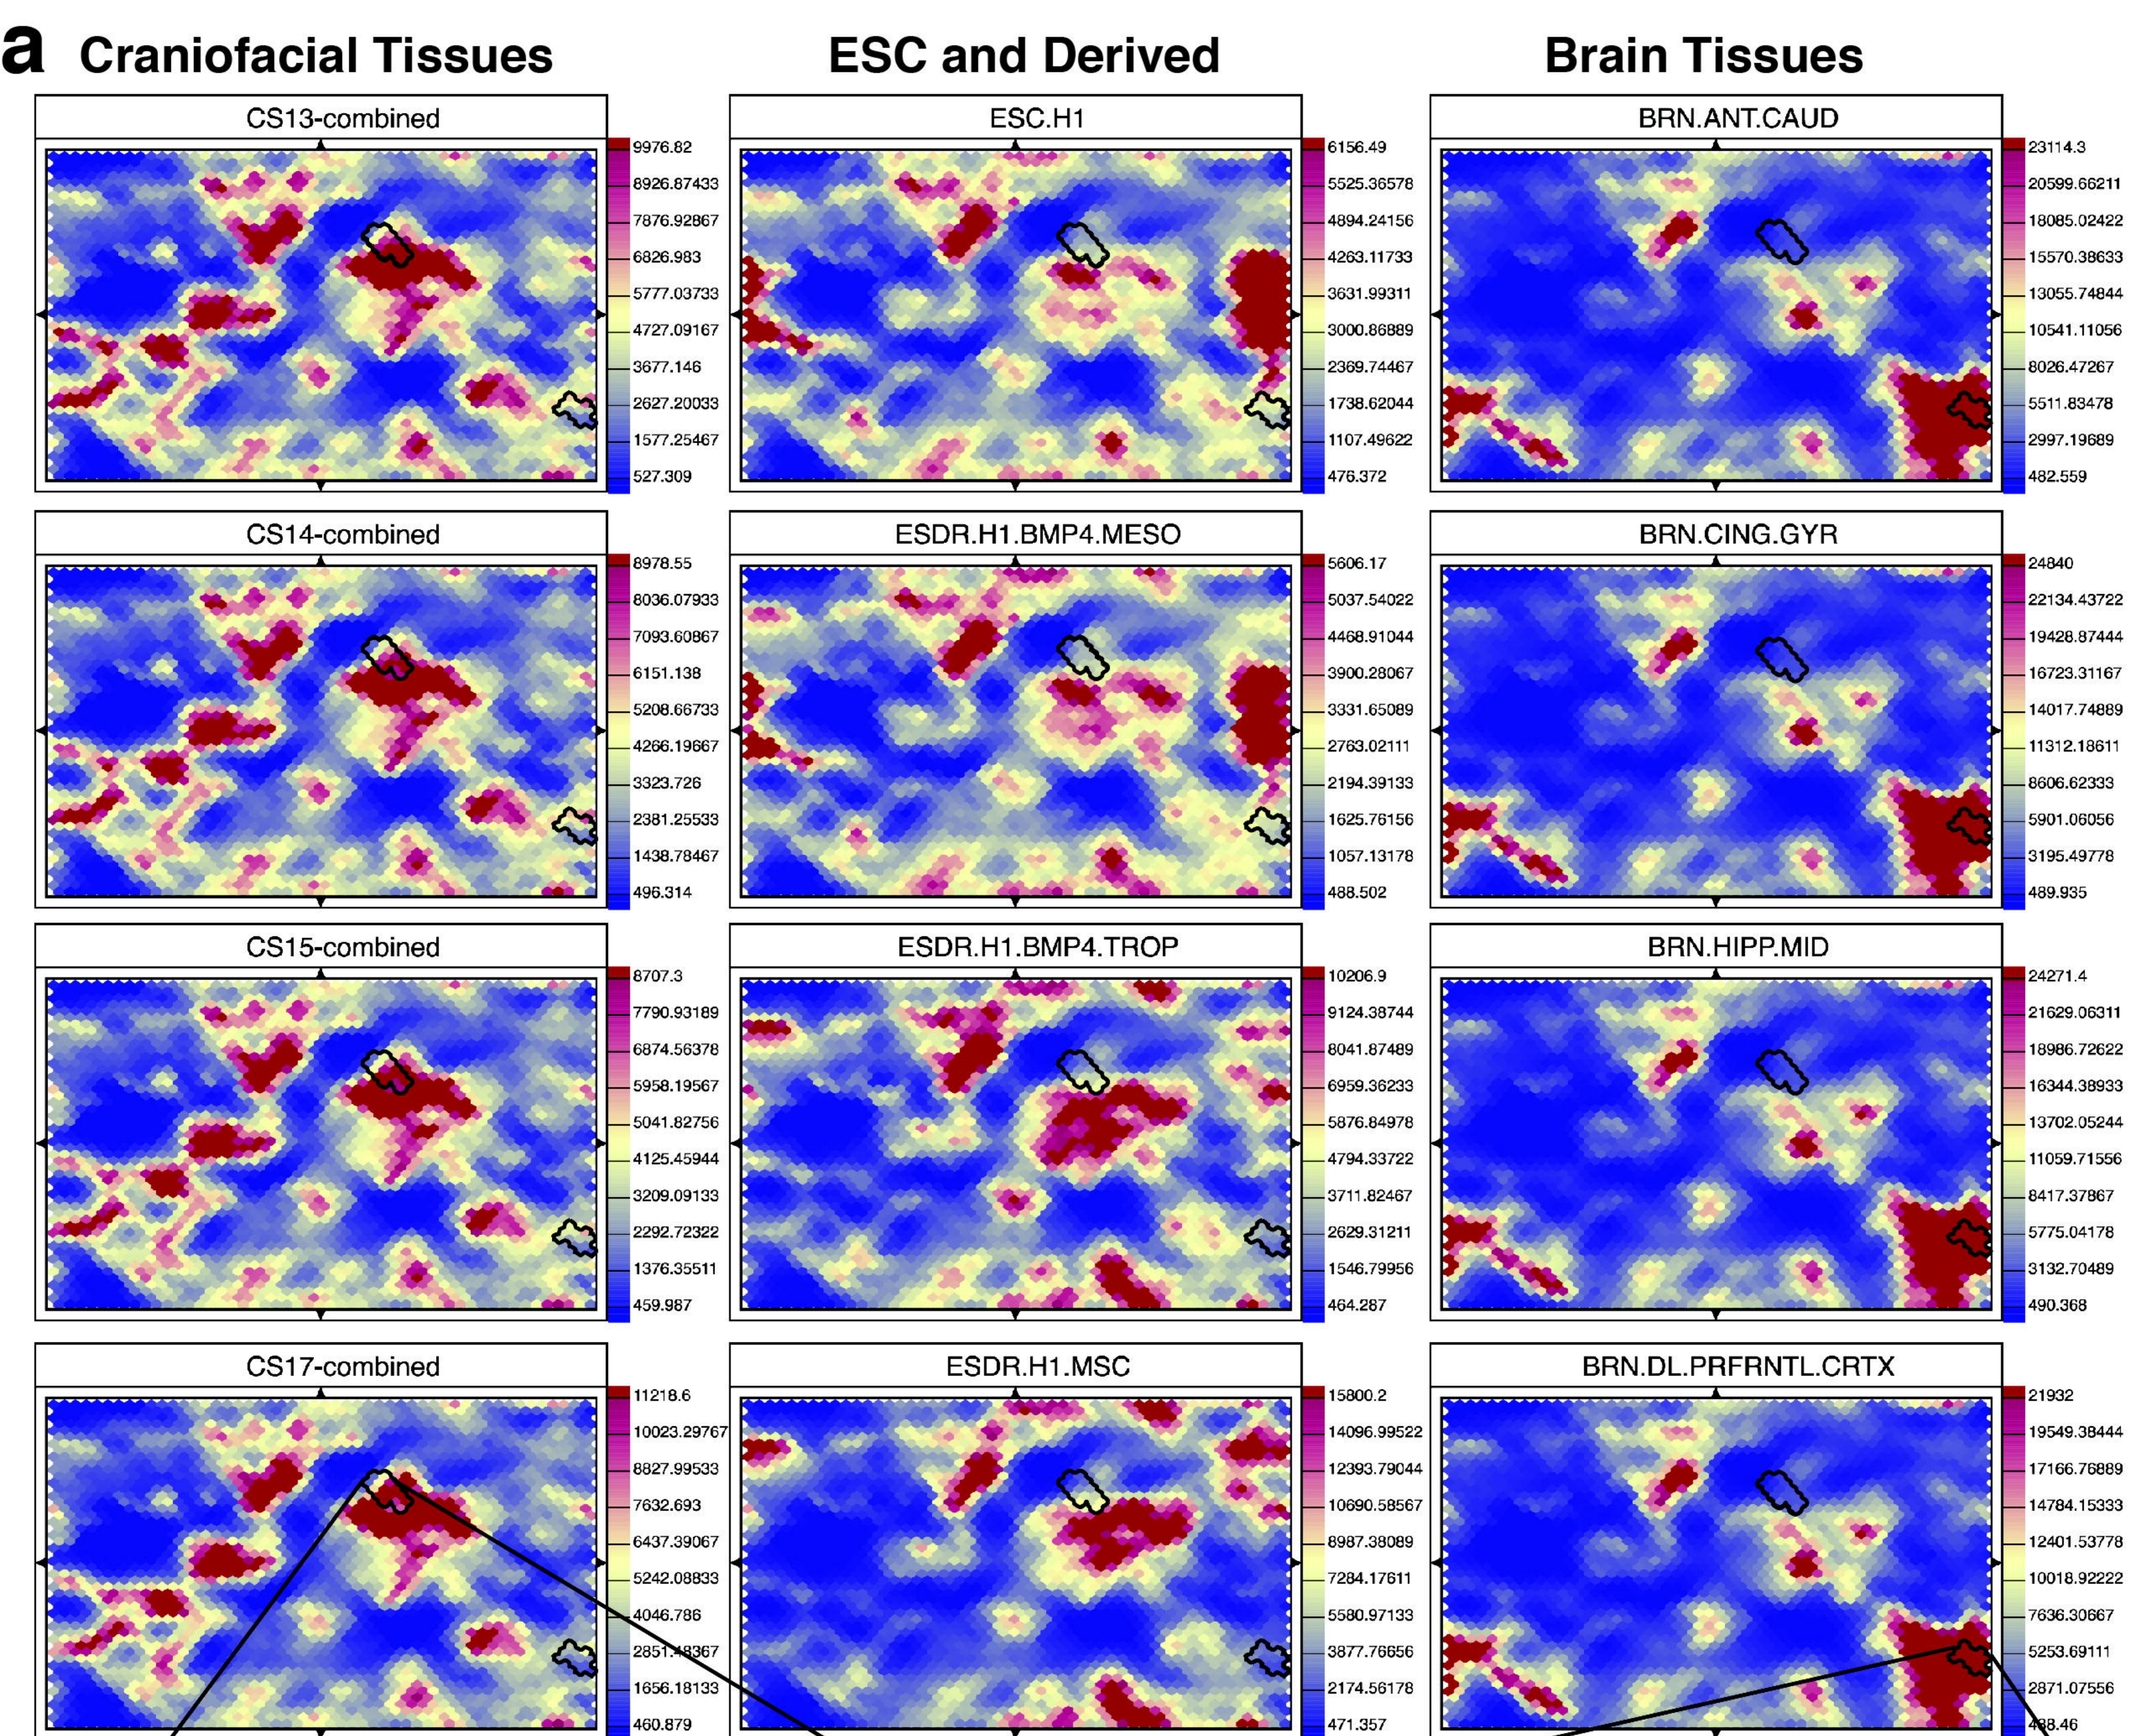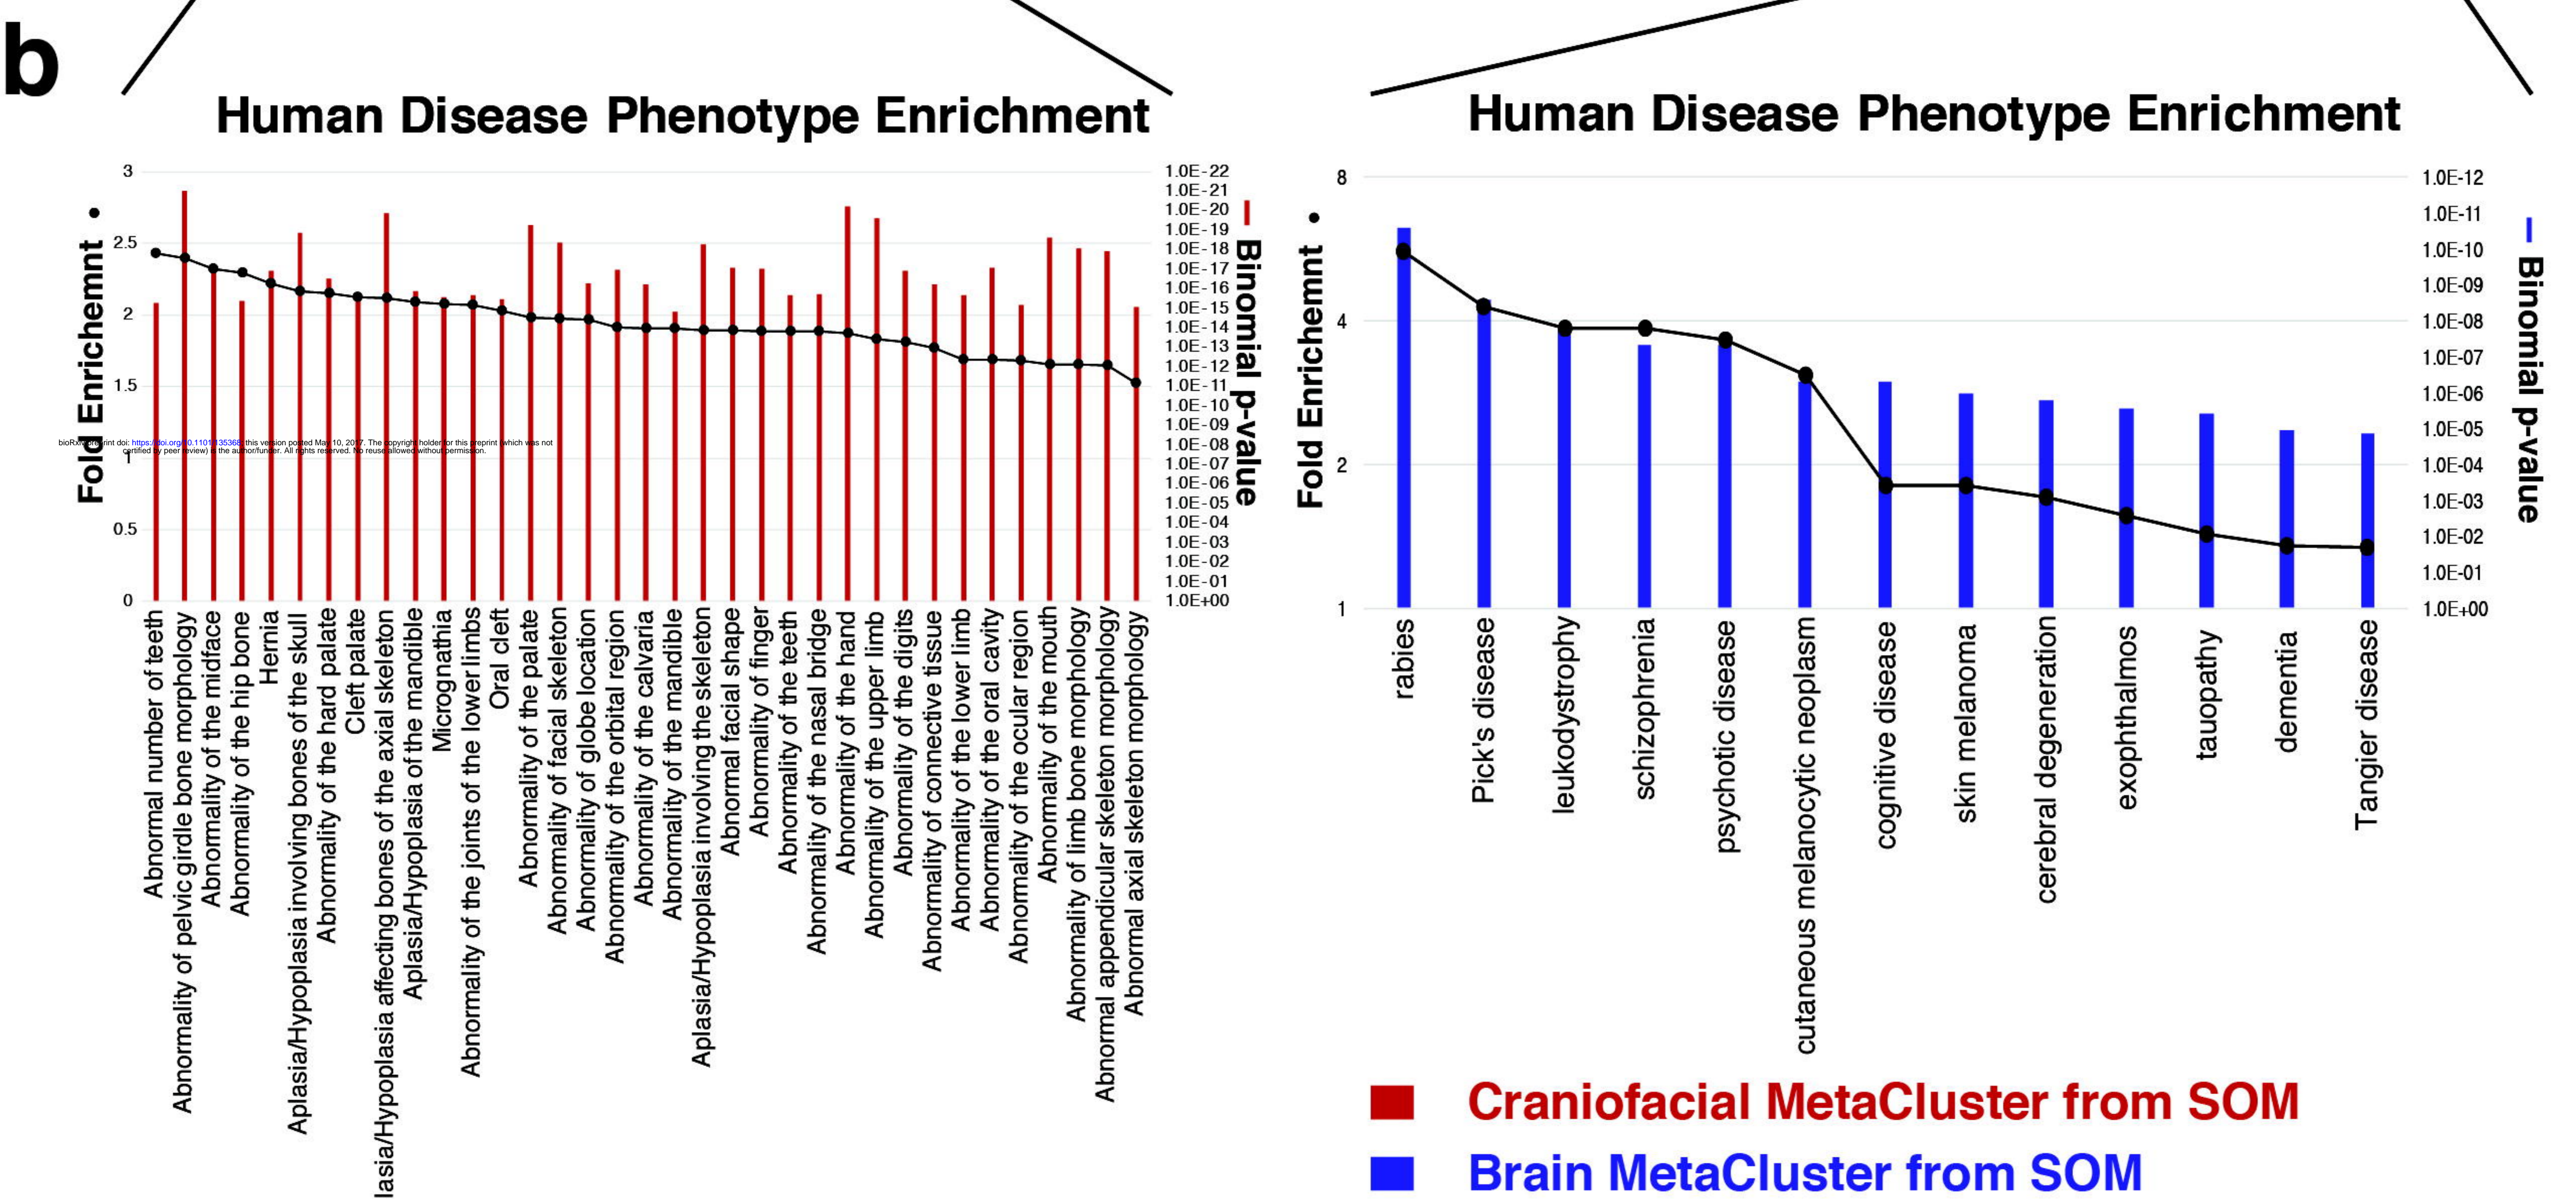



**a**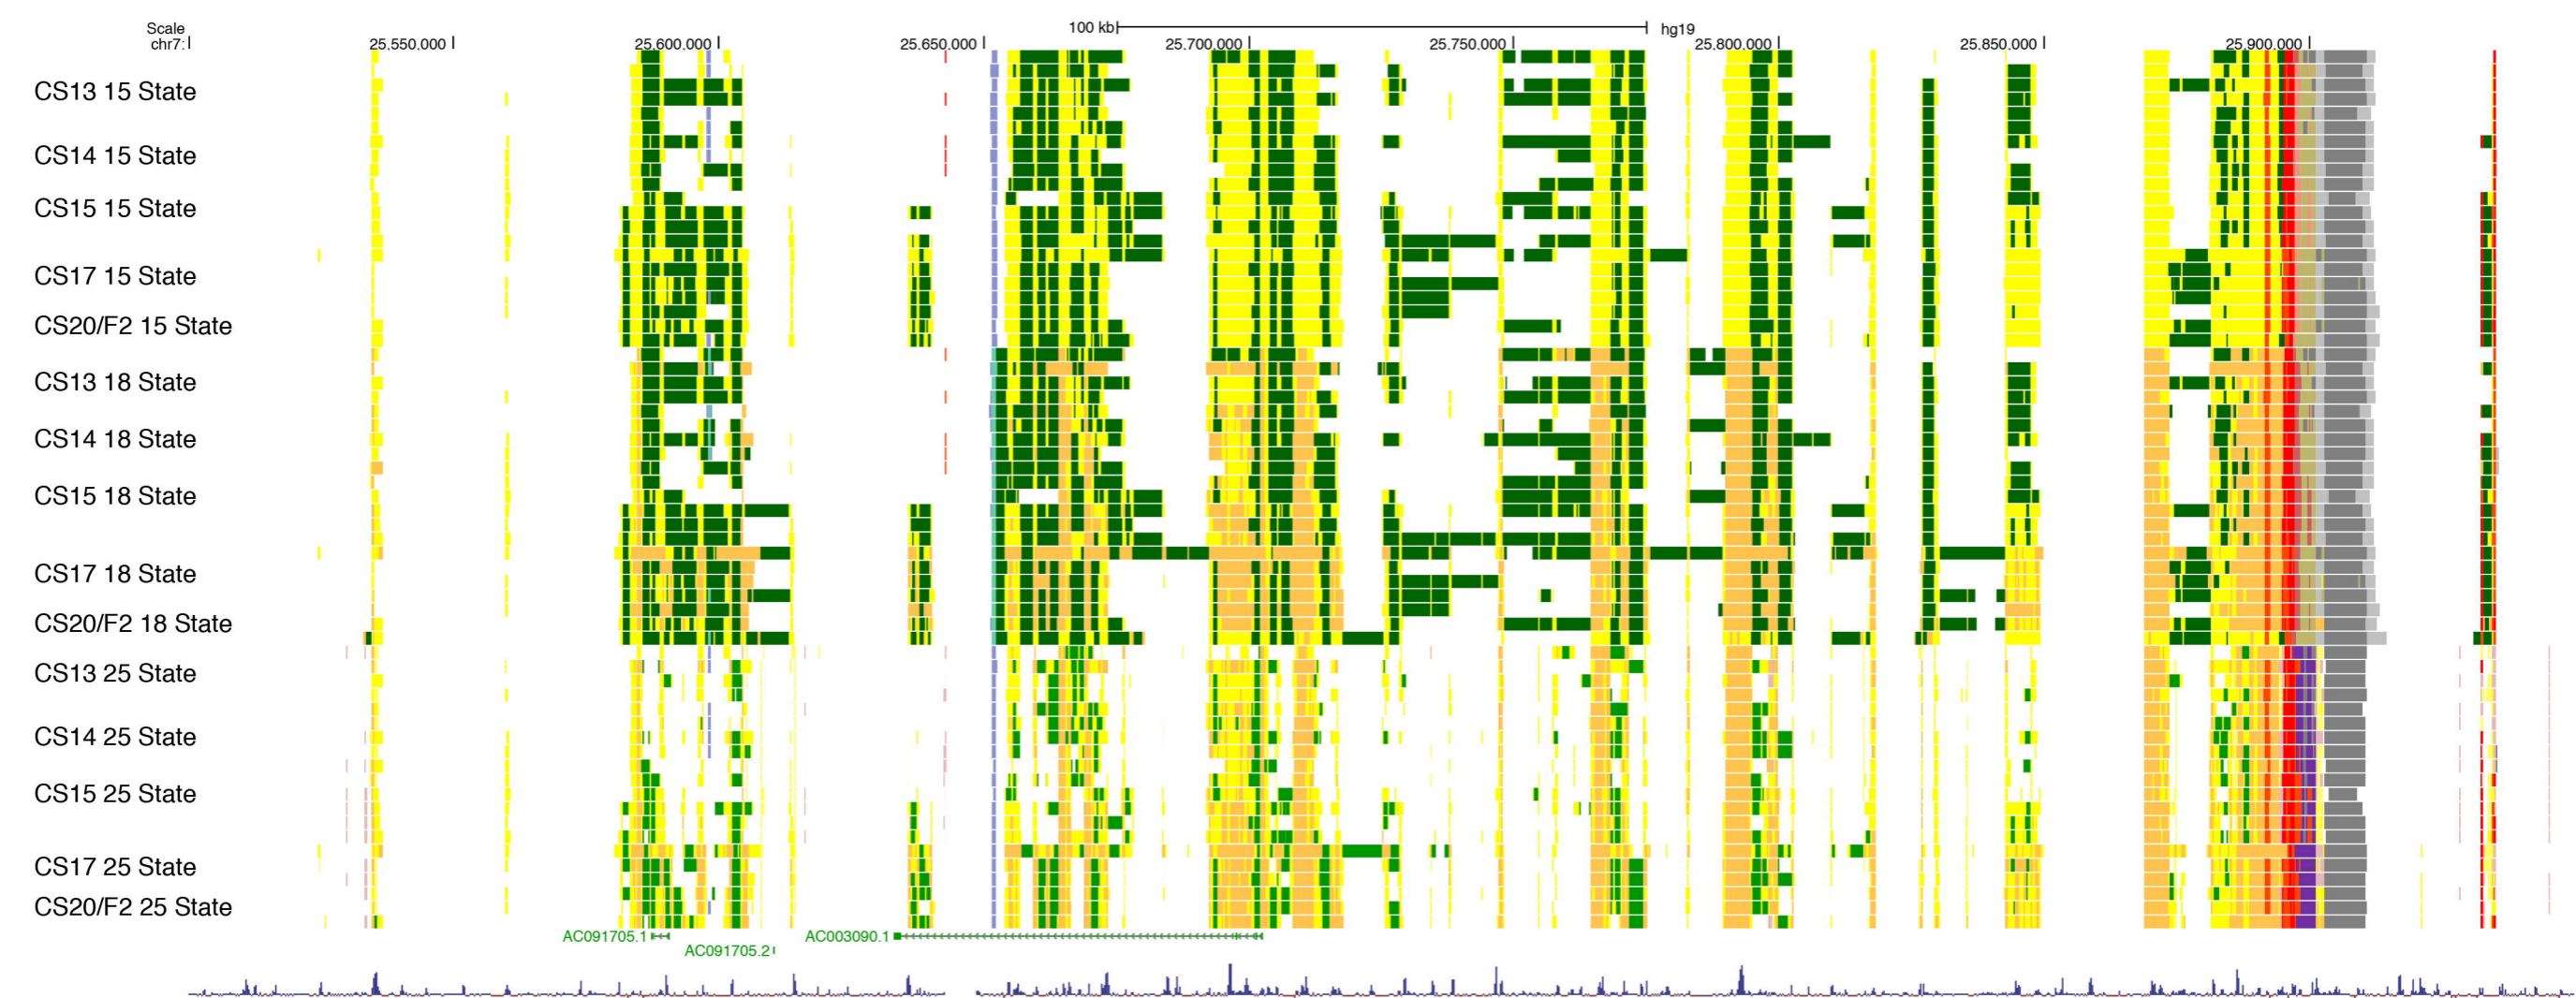**Mouse 4C Viewpoints****Enhancers**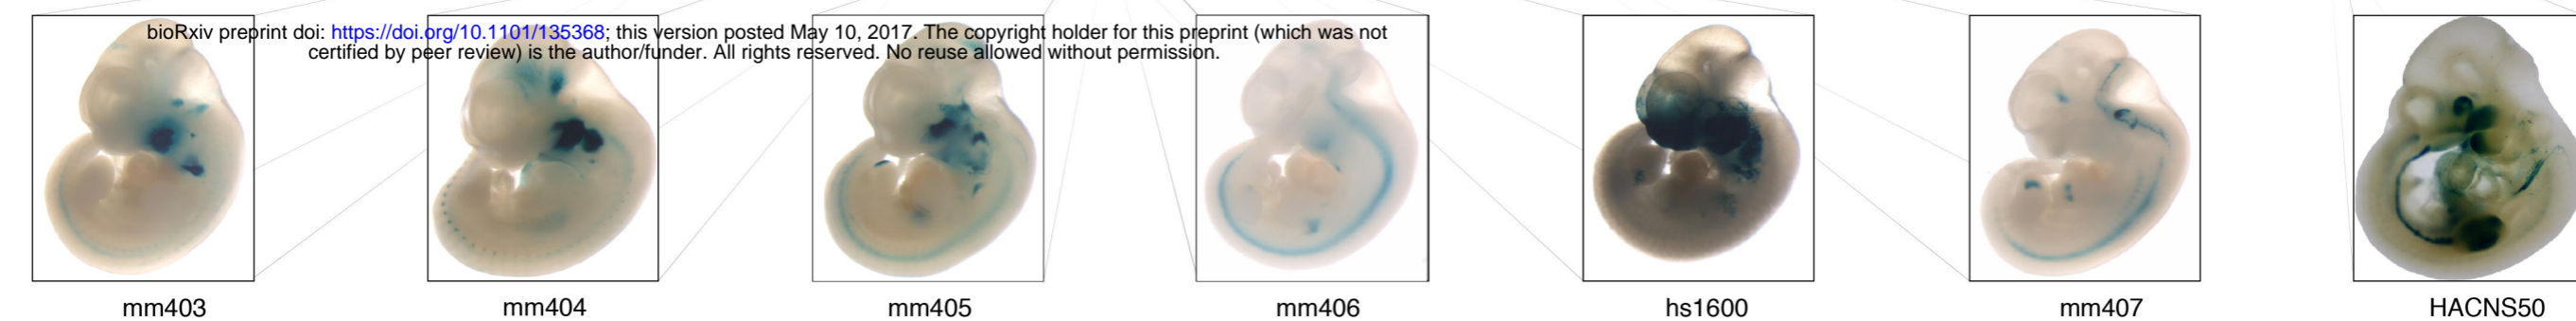**b**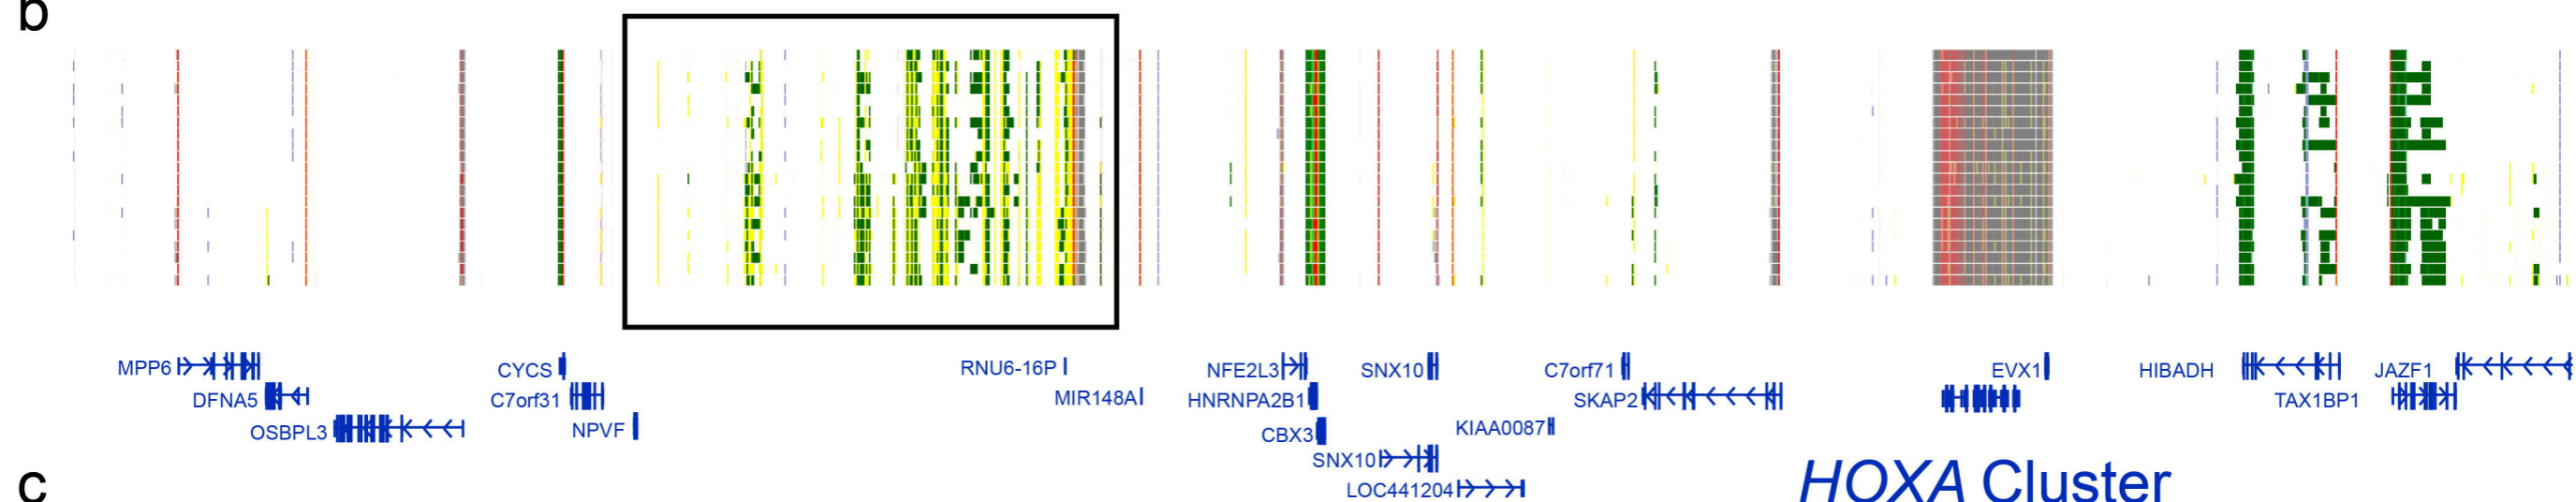**c**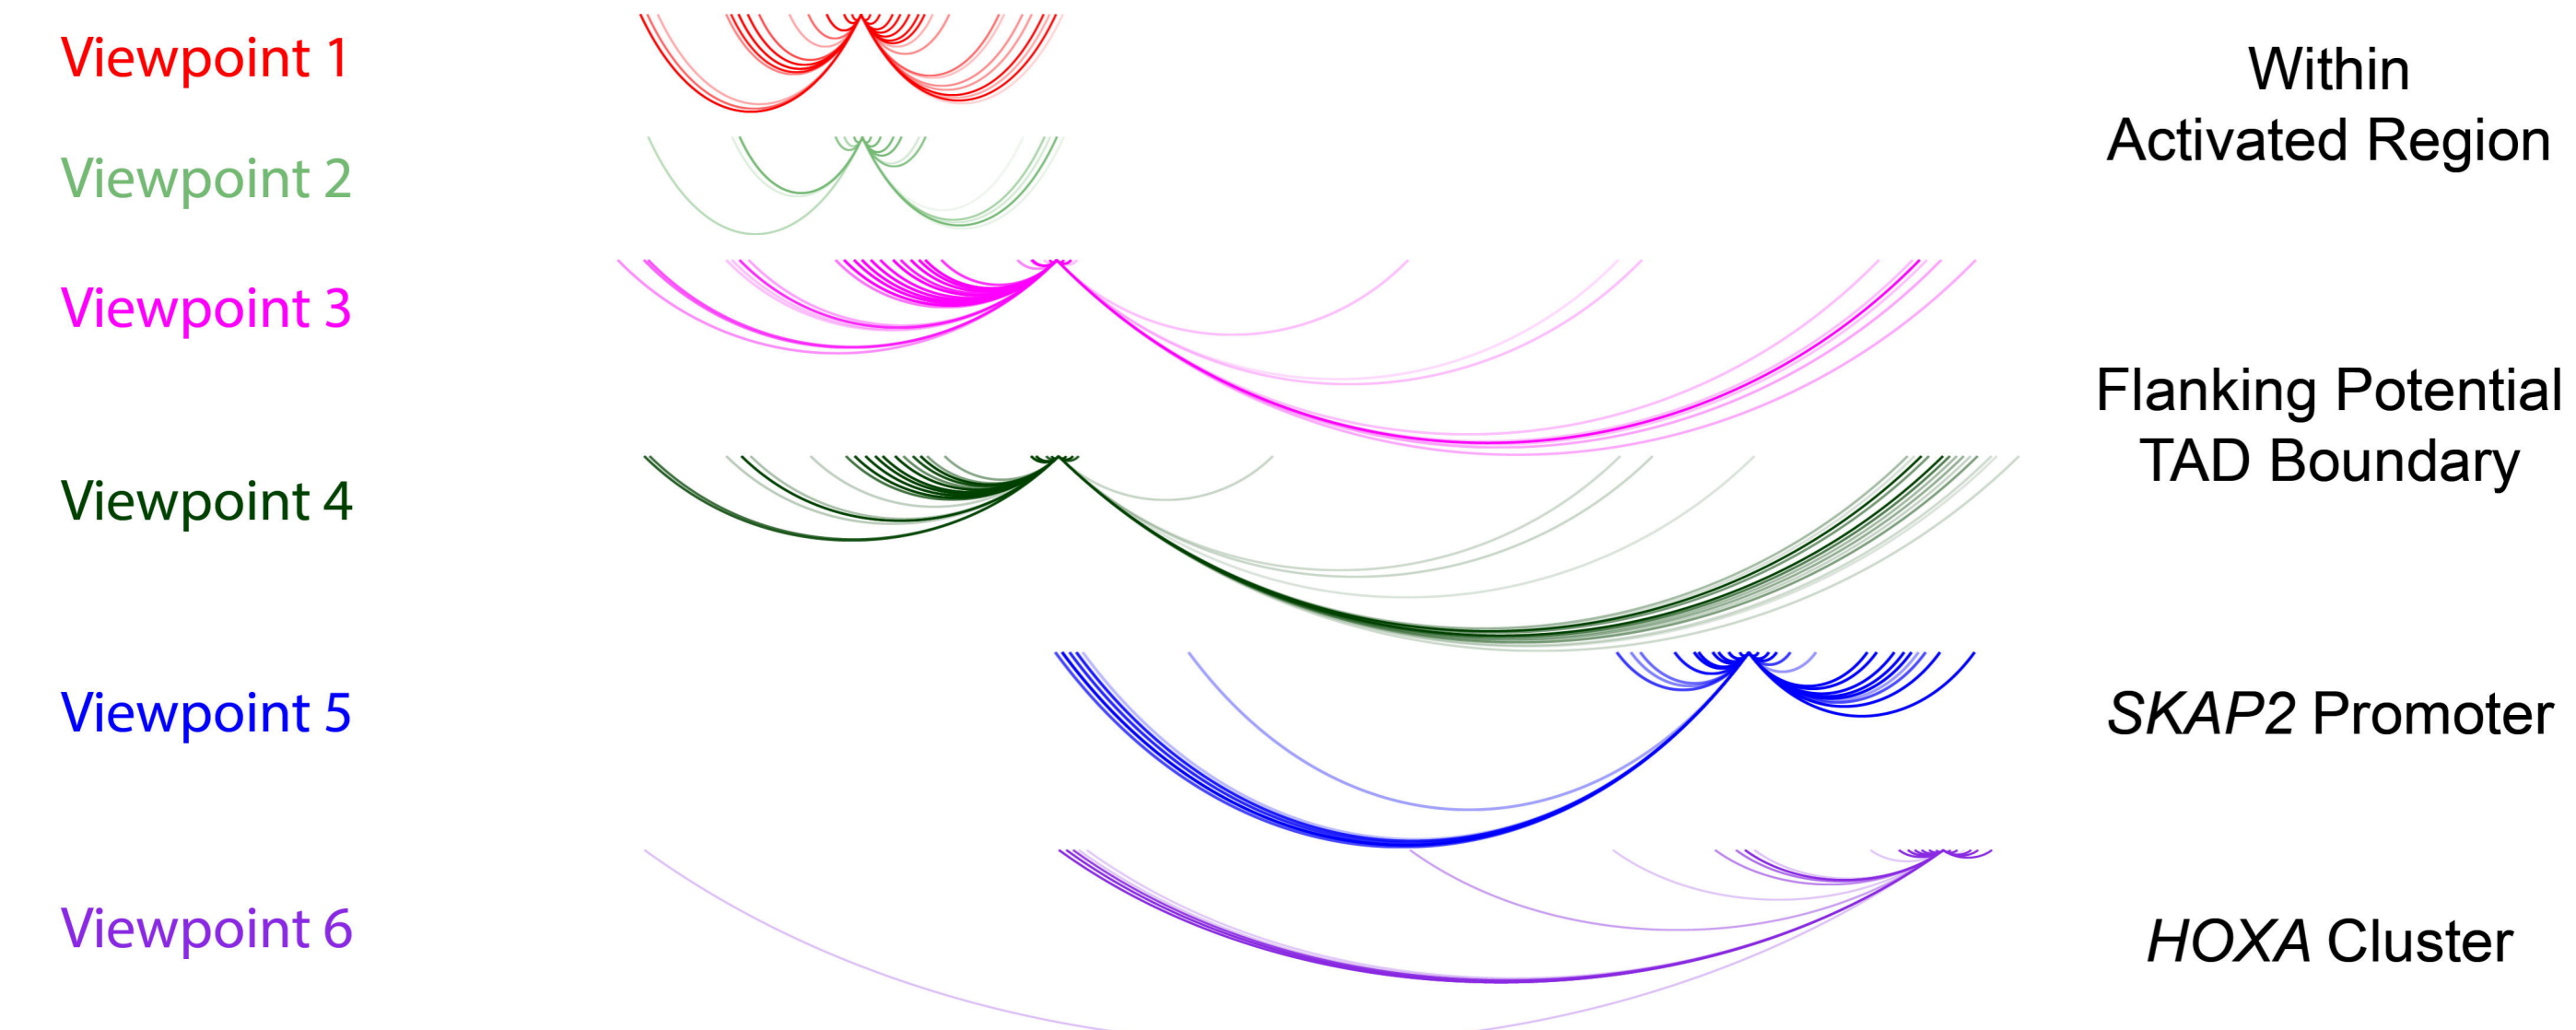

Source: http://www.biorxiv.org/content/10.1101/135368v1.full.pdf
